# Supplementary material
Source: publisher figshare collection journal article supplement (https://tandf.figshare.com/ndownloader/files/12805415)
Supplement: Supplementary file 1 [file 12805415]

**SUPPORTING INFORMATION**

**SYNTHESIS OF NOVEL CLASS OF 2-OXAZOLIDINONE BASED CHIRAL IONIC LIQUIDS**

Sagar P. Nehate, Himanshu M. Godbole* and Girij P. Singh

Lupin Limited, 46 & 47A, Village Nande, Taluka Mulshi, Pune 412115

Jessy E. Mathew, Gautham G Shenoy

Manipal Academy of Higher Education, Manipal, Karnataka, India-576104

**General Procedure for the Synthesis of Alkyl Bromide (1a - 1f)** [12]

In a round bottom flask dimethyl sulfoxide (50 mL) was added. Added 1, 3 di-bromo propane (61.7 g, 306 mmol) and powdered potassium hydroxide (4.47 g, 80 mmol) to the reaction mixture. Reaction mixture cooled to 15-20 °C. To the cooled reaction mixture, added ( S)-4-phenyloxazolidin-2-one (10 g, 61.3 mmol) in 4 to 5 lots at 5 minute intervals. The reaction mixture stirred further at 15-20 °C for 3-4 hrs. Water (150 mL) added to the reaction mixture and it extracted in dichloromethane (200 mL). Organic layer concentrated on laboratory rotary evaporator. The residue purified on silica gel column using cyclohexane/ethyl acetate to get (**1a)** as colorless oil. Yield: 13.1 g (75%). **1b to 1f** were prepared in the same manner as **1a.**

**(S)-3-(3-bromopropyl)-4-phenyloxazolidin-2-one** **(1a**): 1H NMR (500 MHz, CDCl3): δ, 2.00-2.09 (m, 2H), 2.99-3.02 (m, 1H), 3.34-3.38 (m, 2H), 3.49-3.52 (m, 1H), 4.17-4.20 (t, 1H), 4.64-4.68 (t, 1H), 4.79-4.82 (dd, 1H), 7.28-7.46 (m, 5H); 13C NMR (125 MHz, CDCl3): 158.3, 137.7, 129.4, 129.3, 127.0, 69.9, 60.4, 41.1, 30.2, 30.0; IR (neat), ν/cm-1: 1749; Anal. calcd for C12H14BrNO2:C, 50.72; H, 4.97; N, 4.93. Found: C, 50.60; H, 5.10; N, 4.85.

**(S)-3-(6-bromohexyl)-4-phenyloxazolidin-2-one (1b**): (S)-3-(6-bromohexyl)-4-phenyloxazolidin-2-one **(1b)** prepared in the same manner as **(1a)** from (S)-4-phenyloxazolidin-2-one and 1,6 dibromo hexane, as colorless oil,  1H NMR (500 MHz, CDCl3): δ, 1.27-1.30(m, 2H), 1.39-1.48(m, 4H), 1.80-1.83 (m, 2H), 2.80-2.85 (m, 1H), 3.37-3.46 (m, 3H), 4.12-4.15 (t, 1H), 4.62-4.65 (t, 1H), 4.77-4.80 (dd, 1H), 7.28-7.45 (5H); 13C NMR (125 MHz, CDCCl3): 158.3, 137.9, 129.3, 129.15, 127.0, 69.8, 59.8, 41.9, 33.7, 32.5, 27.6, 26.7, 25.7; IR (neat), ν/cm-1: 1748; Anal. calcd for C15H20BrNO2 : C, 55.23; H, 6.18; N, 4.29. Found: C, 55.30; H, 6.22; N, 4.35.

**(S)-3-(3-bromopropyl)-4-isopropyloxazolidin-2-one (1c): (**S)-3-(3-bromopropyl)-4-isopropyloxazolidin-2-one **(1c)** prepared in the same manner as **(1a)** from (S)-4-isopropyloxazolidin-2-one and 1,3 dibromo propane, as colorless oil, (Yield: 75 %); 1H NMR (500 MHz, CDCl3): δ, 0.86 -0.97 (dd, 6H), 2.10-2.25 (m, 3H), 3.08-3.22 (m, 1H), 3.40-3.45 (m, 1H), 3.47-3.53 (m, 1H), 3.72-3.80 (m, 1H), 4.04-4.09 (dd, 1H), 4.20-4.24 (t, 1H); 13C NMR (125 MHz, CDCCl3): 158.7, 62.5, 59.6, 39.3, 30.4, 27.8, 17.7, 14.3; IR (ν/cm-1) 1739; Anal. calcd for C9H16BrNO2: C, 43.22; H, 6.45; N, 5.60. Found: C, 43.05; H, 6.40; N, 5.53.

**(S)-3-(6-bromohexyl)-4-isopropyloxazolidin-2-one (1d):** (S)-3-(6-bromohexyl)-4-isopropyloxazolidin-2-one **(1d)** prepared in the same manner as **(1a)** from (S)-4-isopropyloxazolidin-2-one and 1,6 dibromo hexane, as colorless oil, (Yield: 78 %); 1H NMR (500 MHz, CDCl3): δ, 0.87 -0.93 (dd, 6H), 1.34-1.37(m, 2H), 1.47-1.60 (m, 4H), 1.84-1.90(m, 2H), 2.07-2.08 (m, 1H), 2.98-2.99 (m, 1H), 3.41-3.43 (m, 2H), 3.50 (m, 1H), 3.74-3.77 (m, 1H), 4.06-4.09 (dd, 1H), 4.20-4.24 (t, 1H); 13C NMR (125 MHz, CDCCl3): 158.4, 62.7, 58.9, 41.6, 33.8, 32.7, 27.7, 27.5, 27.0, 25.9, 24.9, 17.7, 14.2; IR (ν/cm-1) 1740; Anal. calcd for C12H22BrNO2: C, 49.32; H, 7.59; N, 4.79. Found: C, 49.50; H, 7.70; N, 4.71.

**(S)-4-benzyl-3-(3-bromopropyl)oxazolidin-2-one (1e**):(S)-4-benzyl-3-(3-bromopropyl)oxazolidin-2-one **(1e)** prepared in the same manner as **(1a)** from (S)-4-benzyloxazolidin-2-one and 1,3 dibromo propane, as colorless oil, 1H NMR (500 MHz, CDCl3): δ, 2.00-2.25 (m, 2H), 2.62-7.72 (m, 1H), 3.12-3.65 (m, 5H), 4.06-4.20 (m, 3H), 7.19-7.36 (m, 5H); 13C NMR (125 MHz, CDCl3): 158.1, 135.1, 128.9, 128.8, 127.0, 66.7, 56.4, 40.9, 38.4, 30.5, 30.2; IR (neat), ν/cm-1: 1750; Anal. calcd for C13H16BrNO2: C, 52.37; H, 5.41; N, 4.70. Found: C, 52.31; H, 5.50; N, 4.64.

**(S)-4-benzyl-3-(6-bromohexyl)oxazolidin-2-one (1f**):(S)-4-benzyl-3-(6-bromohexyl)oxazolidin-2-one **(1f)** prepared in the same manner as (1a) from (S)-4-benzyloxazolidin-2-one and 1,6 dibromo hexane, as colorless oil, 1H NMR (500 MHz, CDCl3): δ, 1.30-1.36(m, 2H), 1.46-1.49(m, 2H), 1.57-1.62(m, 2H), 1.85-1.88 (m, 2H), 2.67-2.72 (m, 1H), 3.09-3.14 (m, 2H), 3.40-3.43(m, 2H), 3.50-3.52( m, 1H), 4.00-4.04 (t, 1H), 4.18(t, 1H), 7.17-7.36 (m, 5H); 13C NMR (125 MHz, CDCl3): 158.1, 135.5, 129.0, 128.8, 127.2, 66.7, 56.0, 41.9, 38.5, 33.7, 32.5, 27.7, 27.2, 25.8; IR (neat), ν/cm-1: 1751; Anal. calcd for C16H22BrNO2: C, 56.48; H, 6.52; N, 4.12. Found: C, 56.70; H, 6.55; N, 4.00.

**General Procedure for the Synthesis of Ionic liquids/salts (2a):**

In a round bottom flask acetonitrile (20 mL) was added. (S)-3-(3-bromopropyl)-4-phenyloxazolidin-2-one (**1a)** (10 g, 35.2 mmol) and N-methyl imidazole (2.9 g, 35.2 mmol) were added to it. Then the reaction mixture was heated to 60-70 °C for 5-6 hrs. The reaction mixture was cooled to room temperature. It was then concentrated under reduced pressure. Water (50 mL) was added to the reaction mixture and the aqueous layer was washed with ethyl acetate (50 mL X 5). The aqueous layer was concentrated under reduced pressure to get **(2a)**. Light yellow viscous oil dried under high vacuum for 48 hrs at 50 °C.

**2a:** **(S)-3-methyl-1-(3-(2-oxo-4-phenyloxazolidin-3-yl)propyl)-1H-imidazol-3-ium bromide:** (Yield: 11.3 g, 87%); [α]20D = +25.5° (c = 1, methanol); Density ρ = 1.34 g/cm3; 1H NMR (500 MHz, CD3OD): δ, 1.96-2.11 (m, 2H), 2.88-2.95 (m, 1H), 3.33-3.38 (m, 1H), 3.93 (s, 3H), 4.17-4.30 (m, 3H), 4.73-4.89 (t, 1H), 5.02-5.06 (t, 1H), 7.40-7.64 (7H), 8.94, (s, 1H); 13C NMR (125 MHz, CD3OD): 160.8, 139.1, 138.0, 130.4, 130.2, 128.4, 124.9, 123.5, 71.5, 60.8, 47.9, 39.8, 36.6, 28.5; IR (ν/cm-1) 2936, 1719, 1638, 1168; Anal. calcd for C16H20N3O2Br: C, 52.47; H, 5.50; N, 11.47. Found: C, 52.50; H, 5.57; N, 11.42.

**2b: (S)-1-methyl-3-(6-(2-oxo-4-phenyloxazolidin-3-yl)hexyl)-1H-imidazol-3-ium-bromide:** **(2b)** prepared in the same manner as **(2a)** from (S)-3-(6-bromohexyl)-4-phenyloxazolidin-2-one **(1b)** and N-methyl imidazole, as light yellow oil:  **(**Yield: 11.6 g, 93%); [α]20D = +32.68° (c = 1, methanol); Density ρ = 1.29 g/cm3; 1H NMR (500 MHz, CD3OD): δ, 1.30 -1.44 (m, 6H), 1.88 (m, 2H), 2.82 (m, 1H), 3.35-3.38 (m, 1H), 3.93 (s, 3H), 4.12-4.20 (m, 3H), 4.71-4.74 (dd, 1H), 4.85-5.01 (dd, 1H), 7.37-7.45 (m, 5H), 7.60-7.67 (d, 2H), 8.99 (s, 1H); 13C NMR (125 MHz, CD3OD): 160.6, 139.1, 137.7, 130.3, 130.0, 128.3, 124.9, 124.8, 123.5, 71.4, 60.8, 49.5, 42.8, 36.6, 30.8, 27.5, 26.8, 26.4; IR (ν/cm-1) 2936, 1719, 1638, 1168 ; Anal. calcd for C19H26N3O2Br : C, 55.89; H, 6.42; N, 10.29. Found: C, 55.68; H, 6.53; N, 10.35.

**2c: (S)-1-(3-(4-isopropyl-2-oxooxazolidin-3-yl)propyl)-3-methyl-1H-imidazol-3-ium bromide**: **(2c)** prepared in the same manner as **(2a)** from **(**S)-3-(3-bromopropyl)-4-isopropyloxazolidin-2-one **(1c)** and N-methyl imidazole, as light yellow oil (Yield: 11.9 g, 90%); [α]20D = +23.6° (c=1, methanol); Density ρ = 1.38 g/cm3; 1H NMR (500 MHz, CD3OD): δ, 0.86 -0.97 (dd, 6H), 2.18-2.25 (m, 3H), 3.20-3.32 (m, 1H), 3.45-3.49 (m, 1H), 3.99 (s, 3H), 4.01-4.04 (m, 1H) 4.20-4.23 (m, 1H) 4.33-4.40 (m, 3H), 7.65-7.66 (d, 1H), 7.78-7.79 (d, 1H), 9.09 (s, 1H); 13C NMR (125 MHz, CD3OD): 160.8, 138.2, 124.9, 123.6, 64.5, 60.1, 48.1, 39.3, 36.6, 28.8, 28.3, 17.7, 14.3; IR (ν/cm-1) 2963, 1727,1486, 1440, 1170; Anal. calcd for C13H22N3O2Br: C, 47.00; H, 6.67; N, 12.65. Found: C, 47.10; H, 6.76; N, 12.49.

**2d : (S)-3-(6-(4-isopropyl-2-oxooxazolidin-3-yl)hexyl)-1-methyl-1H-imidazol-3-ium-bromide:** **(2d)** prepared in the same manner as **(2a)** from (S)-3-(6-bromohexyl)-4-isopropyloxazolidin-2-one **(1d)** and N-methyl imidazole as yellow color viscous oil: (Yield: 11.8 g, 92%); [α]20D = +27.4°(c=1, methanol); Density ρ = 1.32 g/cm3; 1H NMR (500 MHz, CD3OD): δ, 0.86-0.97 (dd, 6H),1.43(m, 4H), 1.60-1.66 (m, 2H),1.96-1.97(m, 2H), 2.14-2.17(m, 1H), 3.06-3.10 (m, 1H), 3.41-3.46(m, 1H), 3.94-3.98(m, 1H), 4.02(s, 3H) 4.17-4.19 (m, 1H) 4.30-4.35 (m, 3H), 7.68-7.77 (d, 2H), 9.14 (s, 1H); 13C NMR (125 MHz, CD3OD): 160.5, 137.7, 124.8, 123.5, 64.3, 60.0, 50.5, 42.4, 36.6, 30.8, 28.5, 27.7, 26.9, 26.5, 17.8, 14.5; IR (ν/cm-1) 2930, 1726,1572, 1430, 1168; Anal. calcd for C16H28N3O2Br: C, 51.34; H, 7.54; N, 11.23 . Found: C, 50.93; H, 7.80; N, 11.50.

**2e: (S)-1-(3-(4-benzyl-2-oxooxazolidin-3-yl)propyl)-3-methyl-1H-imidazol-3-ium-bromide : (2e)** prepared in the same manner as **(2a)** from S)-4-benzyl-3-(3-bromopropyl)oxazolidin-2-one **(1e)** and N-methyl imidazole as a yellow color viscous oil:  **(**Yield: 11.1 g, 87%); [α]20D = +25.7°(c=1, methanol); Density ρ = 1.40 g/cm3; 1H NMR (500 MHz, CD3OD): δ, 2.19-2.23 (m, 2H), 2.81-2.85 (q, 1H), 3.14-3.18 (q,1H), 3.31-3.34 (m, 1H), 3.46-4.49 (t, 1H), 3.74(s, 1H), 3.95 (s, 3H) , 4.116-4.12 (d, 1H), 4.28-4.34 (m, 4H) , 7.10-7.35 (m, 5H) , 7.61-7.61 (d , 1H) , 7.63-7.74 (d, 1H); 13C NMR (125 MHz, CD3OD): 160.8, 137.3, 130.6, 129.9, 128.1, 125.0, 123.7, 68.5, 57.3, 48.2, 39.9, 38.8, 36.7, 29.3; Anal. calcd for C17H22N3O2Br: C, 53.69; H, 5.83; N, 11.05. Found: C, 53.90; H, 5.74; N, 11.20.

**2f : (S)-3-(6-(4-benzyl-2-oxooxazolidin-3-yl)hexyl)-1-methyl-1H-imidazol-3-ium-bromide :** **(2f)** prepared in the same manner as **(2a)** from (S)-4-benzyl-3-(6-bromohexyl)oxazolidin-2-one **(1f)** and N-methyl imidazole as a pale yellow oil **,** (Yield: 11.2 g, 90%); [α]20D = +21.3° (c=1, methanol); Density ρ = 1.34 g/cm3; 1H NMR (500 MHz, CD3OD): δ, 1.37-1.41 (m, 4H), 1.60-1.62 (m, 2H), 1.91-1.92 (m, 2H), 2.79-2.83 (m, 1H), 3.09-3.13 (m, 2H), 3.32-3.43 (m, 1H), 3.95 (s, 3H) , 4.07-4.10 (d, 1H), 4.21-4.27 (m, 4H) , 7.26-7.35 (m, 5H) , 7.59-7.68 (d, 2H) , 9.05(s, 1H); 13C NMR (125 MHz, CD3OD): 160.6, 137.8, 137.3, 130.4, 129.8, 128.0, 124.9, 123.6, 68.2, 57.2,50.7, 42.6, 39.0, 36.5, 30.9, 27.9, 26.8, 26.5; IR (ν/cm-1) 2936, 1732, 1572, 1454, 1168; Anal. calcd for C20H28N3O2Br: C, 56.87; H, 6.68; N, 9.95 . Found: C, 56.82; H, 6.84; N, 9.90.

**2g : (S)-4-methyl-4-(3-(2-oxo-4-phenyloxazolidin-3-yl)propyl)morpholin-4-ium-bromide: (2g)** prepared in the same manner as **(2a)** from (S)-3-(3-bromopropyl)-4-phenyloxazolidin-2-one (**1a)** and N-methyl morphilone as a white solid, Yield: 12 g, 88%); mp: 175-177°C; [α]20D = +23.6°(c=1, methanol); 1H NMR (500 MHz, CD3OD): δ, 1.89 -2.04(m, 2H), 3.07-3.16 (m, 1H), 3.32 (s, 3H), 3.41-3.49 (m, 7H), 3.98-4.00 (t, 4H), 4.24-4.27 (dd, 1H), 4.76-4.79(t, 1H), 5.02-5.04 (dd, 1H), 7.43-7.49 (m, 5H); 13C NMR (125 MHz, CD3OD): 160.9, 139.4, 130.5, 130.3, 128.5, 71.6, 64.3, 61.5, 61.1, 47.0, 40.8, 21.1; IR (ν/cm-1) 2925, 1730, 1478, 1421; Anal. calcd for C17H25N2O3Br: C, 52.99; H, 6.54; N, 7.27. Found: C, 53.04; H, 6.60; N, 7.15.

**2h: (S)-4-methyl-4-(6-(2-oxo-4-phenyloxazolidin-3-yl)hexyl)morpholin-4-ium-bromide:** **(2h)** prepared in the same manner as **(2a)** from (S)-3-(6-bromohexyl)-4-phenyloxazolidin-2-one **(1b)** and N-methyl morphilone as a white solid (Yield: 11.4 g, 87%); mp: 210-212°C; [α]20D = +37.7 ° (c=1, methanol); 1H NMR (500 MHz, CD3OD): δ, 1.36-1.39(q, 4H), 1.48-1.50 (t, 2H), 1.75 -1.85(m, 2H), 2.83(m, 1H), 3.21 (s, 3H), 3.30-3.31 (m, 1H), 3.45-4.51 (m, 6H), 4.00(m, 4H), 4.12-4.15(dd, 1H), 4.65-4.73 (t, 1H), 4.99-5.00(t, 1H), 7.37-7.44 (m, 5H) ; 13C NMR (125 MHz, CD3OD): 160.7, 139.5, 130.3, 130.0, 128.3, 71.5, 66.4, 61.5, 61.0, 60.0, 47.3, 42.8, 27.6, 26.9, 26.7, 22.3; IR (ν/cm-1) 2945, 1737, 1489, 1421; Anal. calcd for C20H31N2O3Br: C, 56.21; H, 7.31; N, 6.55. Found: C, 56.33; H, 7.29; N, 6.50.

**2i: (S)-4-(3-(4-isopropyl-2-oxooxazolidin-3-yl)propyl)-4-methylmorpholin-4-ium-bromode :** **(2i)** prepared in the same manner as **(2a)** from **(**S)-3-(3-bromopropyl)-4-isopropyloxazolidin-2-one **(1c)** and N-methyl morphilone as a white solid (Yield: 12.6 g, 90%); mp: 132-134°C; [α]20D = +35.6° (c=1, methanol); 1H NMR (500 MHz, CD3OD): δ, 0.87 -0.97 (dd, 6H), 2.21-2.23 (m, 3H), 3.24-3.29 (m, 1H), 3.32(s, 3H), 3.53-3.63 (m, 7H), 4.01-4.06 (m, 5H), 4.20-4.24 (m, 1H), 4.38-4.42 (t, 1H); 13C NMR (125 MHz, CD3OD): 160.9, 64.5, 64.2, 61.6, 61.2, 61.1, 60.5, 47.2, 39.7, 28.4, 21.1, 17.7, 14.4; IR (ν/cm-1) 2962, 1725,1484, 1434, 1243; Anal. calcd for C14H27N2O3Br: C, 47.87; H, 7.75; N, 7.97. Found: C, 47.83; H, 7.79; N, 8.05.

**2j : (S)-4-(6-(4-isopropyl-2-oxooxazolidin-3-yl)hexyl)-4-methylmorpholin-4-ium-bromide : (2j)** prepared in the same manner as **(2a)** from (S)-3-(6-bromohexyl)-4-isopropyloxazolidin-2-one **(1d)** and N-methyl morphilone as a white solid (Yield: 12.1 g, 90%); mp: 168-170°C; [α]20D = +25.5° (c=1, methanol); 1H NMR (500 MHz, CD3OD): δ, 0.87 -0.96 (dd, 6H),1.47-1.49(m, 4H), 1.55-1.60(m, 2H) 1.85-1.87 (m, 2H), 2.15-2.16(m, 1H), 3.06-3.10 (m, 1H), 3.26(s, 3H), 3.45-3.59(m, 7H), 3.94-4.03(q, 1H) 4.17-4.20 (m, 4H) 4.30-4.35 (t, 1H), 4.81 (t, 1H); 13C NMR (125 MHz, CD3OD): 160.8, 66.4, 64.3, 61.6, 61.0, 60.3, 47.3, 42.4, 28.6, 27.8, 27.1, 26.8, 22.4, 17.8, 14.5; IR (ν/cm-1) 2955, 1746, 1430, 1142; Anal. calcd for C17H33N2O3Br: C, 51.91; H, 8.46; N, 7.12. Found: C, 52.01; H, 8.70; N, 7.15.

**2k : (S)-4-(3-(4-benzyl-2-oxooxazolidin-3-yl)propyl)-4-methylmorpholin-4-ium-bromide : (2k)** prepared in the same manner as **(2a)** from (S)-4-benzyl-3-(3-bromopropyl)oxazolidin-2-one **(1e)** and N-methyl morphilone as a light yellow viscous oil, (Yield: 12 g, 90%); [α]20D = +26.1° (c=1, methanol); Density ρ = 1.36 g/cm3; 1H NMR (500 MHz, CD3OD): δ, 2.14(m, 2H), 2.86-2.88 (q, 1H), 3.19-3.29 (q, 1H), 3.40-3.41 (m, 1H), 3.50-3.60 (m, 7H), 4.02-4.13(m, 4H), 4.31-4.30 (dd, 1H) ,4.32-4.33 (q, 2H), 7.28-7.35 (m, 5H) ; 13C NMR (125 MHz, CD3OD): 160.8, 137.3, 130.6, 129.9, 128.2, 68.5, 64.3, 61.7, 61.4, 61.3, 57.7, 47.4, 40.5, 38.9, 21.6 ; Anal. calcd for C18H27N2O3Br: C, 54.14; H, 6.82; N, 7.02. Found: C, 54.10; H, 6.92; N, 7.05.

**2l: (S)-4-(6-(4-benzyl-2-oxooxazolidin-3-yl)hexyl)-4-methylmorpholin-4-ium-bromide : (2l)** prepared in the same manner as **(2a)** from (S)-4-benzyl-3-(6-bromohexyl)oxazolidin-2-one **(1f)** and N-methyl morphilone as a light yellow viscous oil,  **(**Yield: 11.4 g, 88%); [α]20D = +22.3° (c=1, methanol); Density ρ = 1.34 g/cm3; 1H NMR (500 MHz, CD3OD): δ, 1.44-1.45 (m, 4H), 1.60-1.65 (m, 2H), 1.83-1.84 (m, 2H), 2.83-2.85 (m, 1H), 3.10-3.19 (m, 2H), 3.74(s, 1H), 3.25 (s, 3H) , 3.45-3.55 (m, 7H), 4.02-4.08 (m, 4H) , 4.20-4.25 (m, 1H), 4.26-4.27 (m, 2H) 7.28-7.36 (m,5H); 13C NMR (125 MHz, CD3OD): 160.4, 137.3, 130.4, 129.7, 128.0, 68.1, 66.4, 61.5, 60.9, 57.0, 42.7, 38.8, 28.0, 27.4, 26.7, 22.4; IR (ν/cm-1) 2935, 1731, 1430, 1251; Anal. calcd for C21H33N2O3Br: C, 57.14; H, 7.54; N, 6.35. Found: C, 56.95; H, 7.49; N, 6.38.

**2m: (S)-1-methyl-1-(3-(2-oxo-4-phenyloxazolidin-3-yl)propyl)pyrrolidin-1-ium-bromide :** **(2m)** prepared in the same manner as **(2a)** from (S)-3-(3-bromopropyl)-4-phenyloxazolidin-2-one (**1a)** and N-methyl pyrrolidine as yellow color oil, (Yield: 11.2 g, 86%); [α]20D = +24.3°(c=1, methanol); Density ρ = 1.32 g/cm3; 1H NMR (500 MHz, CD3OD) : δ, 1.95 -2.01(m, 2H), 2.21 (m, 4H), 2.82 (s, 3H), 3.01-3.08(m, 1H), 3.33-3.53 (m, 7H), 4.20-4.24 (dd, 1H), 4.74-4.79 (t, 1H), 5.03-5.07 (dd, 1H), 7.39-7.49 (m, 5H) ; 13C NMR (125 MHz, CD3OD): 160.7, 139.4, 130.4, 130.2, 128.5, 71.5, 65.5, 62.9, 61.2, 40.8, 23.2, 22.4; IR (ν/cm-1) 2974, 1735, 1477, 1239; Anal. calcd for C17H25N2O2Br: C, 55.29; H, 6.82; N, 7.59. Found: C, 55.22; H, 6.90; N, 7.62.

**2n : (S)-1-methyl-1-(6-(2-oxo-4-phenyloxazolidin-3-yl)hexyl)pyrrolidin-1-ium-bromide :** **(2n)** prepared in the same manner as **(2a)** from (S)-3-(6-bromohexyl)-4-phenyloxazolidin-2-one **(1b)** and N-methyl pyrrolidine as yellow color oil, (Yield: 11.3 g, 90%); [α]20D = +28.2°(c=1, methanol); Density ρ = 1.30 g/cm31H NMR (500 MHz, CD3OD): δ, 1.35-1.39(q, 4H), 1.50-1.51 (t, 2H), 1.79 -1.82(m, 2H), 2.25(m, 4H), 2.81-2.83(m, 1H), 3.11 (s, 3H), 3.38-3.42 (m, 3H), 3.56-3.62 (m, 4H), 4.12-4.15(dd, 1H), 4.72-4.79 (dd, 1H), 5.03-5.06(t, 1H), 7.40-7.48 (m, 5H) ; 13C NMR (125 MHz, CD3OD): 151.1, 130.1, 120.8, 120.5, 118.8, 61.9, 55.8, 51.3, 33.4, 18.1, 17.4, 17.3, 15.0, 13.0; IR (ν/cm-1) 2936, 1738, 1460, 1240; Anal. calcd for C20H31N2O2Br: C, 58.39; H, 7.60; N, 6.81. Found: C, 58.30; H, 7.71; N, 6.90.

**2o: (S)-1-(3-(4-isopropyl-2-oxooxazolidin-3-yl)propyl)-1-methylpyrrolidin-1-ium-bromide : (2o)** prepared in the same manner as **(2a)** from **(**S)-3-(3-bromopropyl)-4-isopropyloxazolidin-2-one **(1c)** and N-methyl pyrrolidine as a white solid, (Yield: 11.9 g, 89%; mp: 124-127°C; [α]20D = +25.1° (c=1, methanol); 1H NMR (500 MHz, CD3OD): δ, 0.80 -0.84(d, 3H), 0.90-94 (d, 3H), 1.96-2.01(m, 2H), 2.08 (m, 5H), 2.99 (s, 3H), 3.01-3.08(m, 1H), 3.38-3.53 (m, 7H), 3.84-3.89 (m, 1H), 4.08-4.11(m, 1H), 4.22-4.26 (m, 1H); 13C NMR (125 MHz, CD3OD): 160.9, 65.6, 64.5, 63.0, 60.5, 39.9, 28.5, 23.2, 22.5, 17.7, 14.3 ; IR (ν/cm-1) 2964, 1727,1484, 1435, 1251; Anal. calcd for C14H27N2O2Br: C, 50.15; H, 8.12; N, 8.36. Found: C, 50.20; H, 7.98; N, 8.43.

**2p : (S)-1-(6-(4-isopropyl-2-oxooxazolidin-3-yl)hexyl)-1-methylpyrrolidin-1-ium-bromide :** **(2p)** prepared in the same manner as **(2a)** from (S)-3-(6-bromohexyl)-4-isopropyloxazolidin-2-one **(1d)** and N-methyl pyrrolidine as a white solid (Yield: 12.1 g, 94%); mp: 153-155°C; [α]20D = +26.4° (c=1, methanol); 1H NMR (500 MHz, CD3OD): δ, 0.87 -0.96 (dd,6H), 1.46-1.48(m, 4H), 1.55-1.60(m, 2H) 1.84-1.87 (m, 2H), 2.15-2.16(m, 1H), 3.06-3.09 (m, 1H), 3.11(s, 3H), 3.45-3.48(m, 3H), 3.56-3.60(m, 4H), 3.93-9.95 (q, 1H) 4.17-4.20 (dd, 1H), 4.29-4.33 (t, 1H); 13C NMR (125 MHz, CD3OD): 160.9, 65.4, 64.3, 60.3, 42.4, 28.6, 27.8, 27.1, 26.9, 24.6, 22.5, 17.7, 14.4; IR (ν/cm-1) 2938, 1749, 1429, 1252; Anal. calcd for C17H33N2O2Br: C, 54.11; H, 8.81; N, 7.42. Found: C, 54.50; H, 8.66; N, 7.37.

**2q: (S)-1-(3-(4-benzyl-2-oxooxazolidin-3-yl)propyl)-1-methylpyrrolidin-1-ium-bromide:** **(2q)** prepared in the same manner as **(2a)** from (S)-4-benzyl-3-(3-bromopropyl)oxazolidin-2-one **(1e)** and N-methyl pyrrolidine as a pale yellow viscous oil, (Yield: 11.3 g, 88%); [α]20D = +27.8° (c=1, methanol); Density ρ = 1.38 g/cm3; 1H NMR (500 MHz, CD3OD): δ, 2.11-2.22(m, 6H), 2.85-2.88 (q, 1H), 3.11-3.29 (s, 3H), 3.20-3.21 (t, 1H), 3.50-3.60 (m, 8H), 4.12-4.13(dd, 1H), 4.31-4.30 (dd, 1H) ,4.31-4.33 (q, 2H), 7.27-7.36 (m, 5H) ; 13C NMR (125 MHz, CD3OD): 160.6, 137.2, 130.5, 129.8, 128.1, 68.4, 65.6, 65.6, 63.0, 57.5, 40.4, 38.8,23.5, 22.5; IR (ν/cm-1) 2934, 1741, 1454, 1248; Anal. calcd for C18H27N2O2Br: C, 56.40; H, 7.10; N, 7.31. Found: C, 56.36; H, 7.15; N, 7.40.

**2r: (S)-1-(6-(4-benzyl-2-oxooxazolidin-3-yl)hexyl)-1-methylpyrrolidin-1-ium-bromide :** **(2r)** prepared in the same manner as **(2a)** from (S)-4-benzyl-3-(6-bromohexyl)oxazolidin-2-one **(1f)** and N-methyl pyrrolidine as a pale yellow viscous oil, (Yield: 11 g, 88%); [α]20D = +24.9°(c=1, methanol); Density ρ = 1.35 g/cm3; 1H NMR (500 MHz, CD3OD): δ, 1.40-1.43 (m, 4H), 1.60-1.62 (m, 2H), 1.83-1.84 (m, 2H), 2.22 (m, 4H), 2.81-2.83 (m, 1H), 3.07(s, 3H), 3.08(m, 2H), 3.30-3.31 (m, 2H) , 3.68-3.37 (m, 1H), 4.25-4.26 (m, 1H) , 4.27-4.28(m, 2H), 7.27-7.36 (m,5H); 13C NMR (125 MHz, CD3OD): 160.6, 137.3, 130.4, 129.8, 128.0, 68.2, 65.4, 57.2, 42.7, 38.9, 28.0, 27.0, 26.7, 24.6, 22.5; IR (ν/cm-1) 2937, 1738, 1429, 1250; Anal. calcd for C21H33N2O2Br: C, 59.29; H, 7.82; N, 6.59. Found: C, 58.85; H, 7.90; N, 6.75.

**Spectral data of compound (2a):**


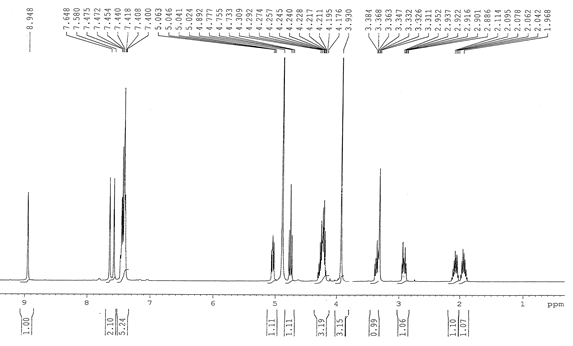


1H NMR of **2a**


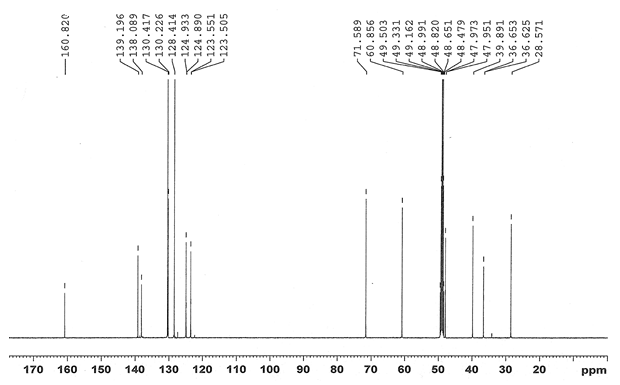


13C NMR of **2a**

**Spectral data of compound (2b):**


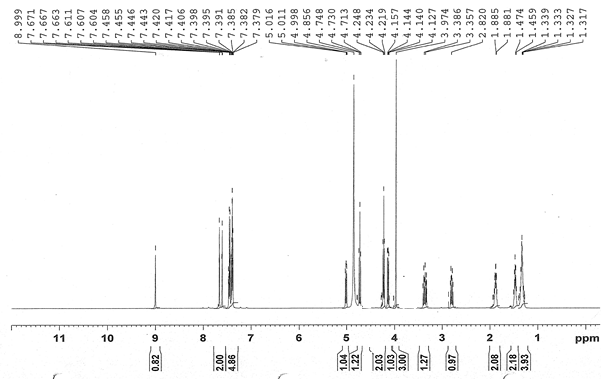


1H NMR of **2b**


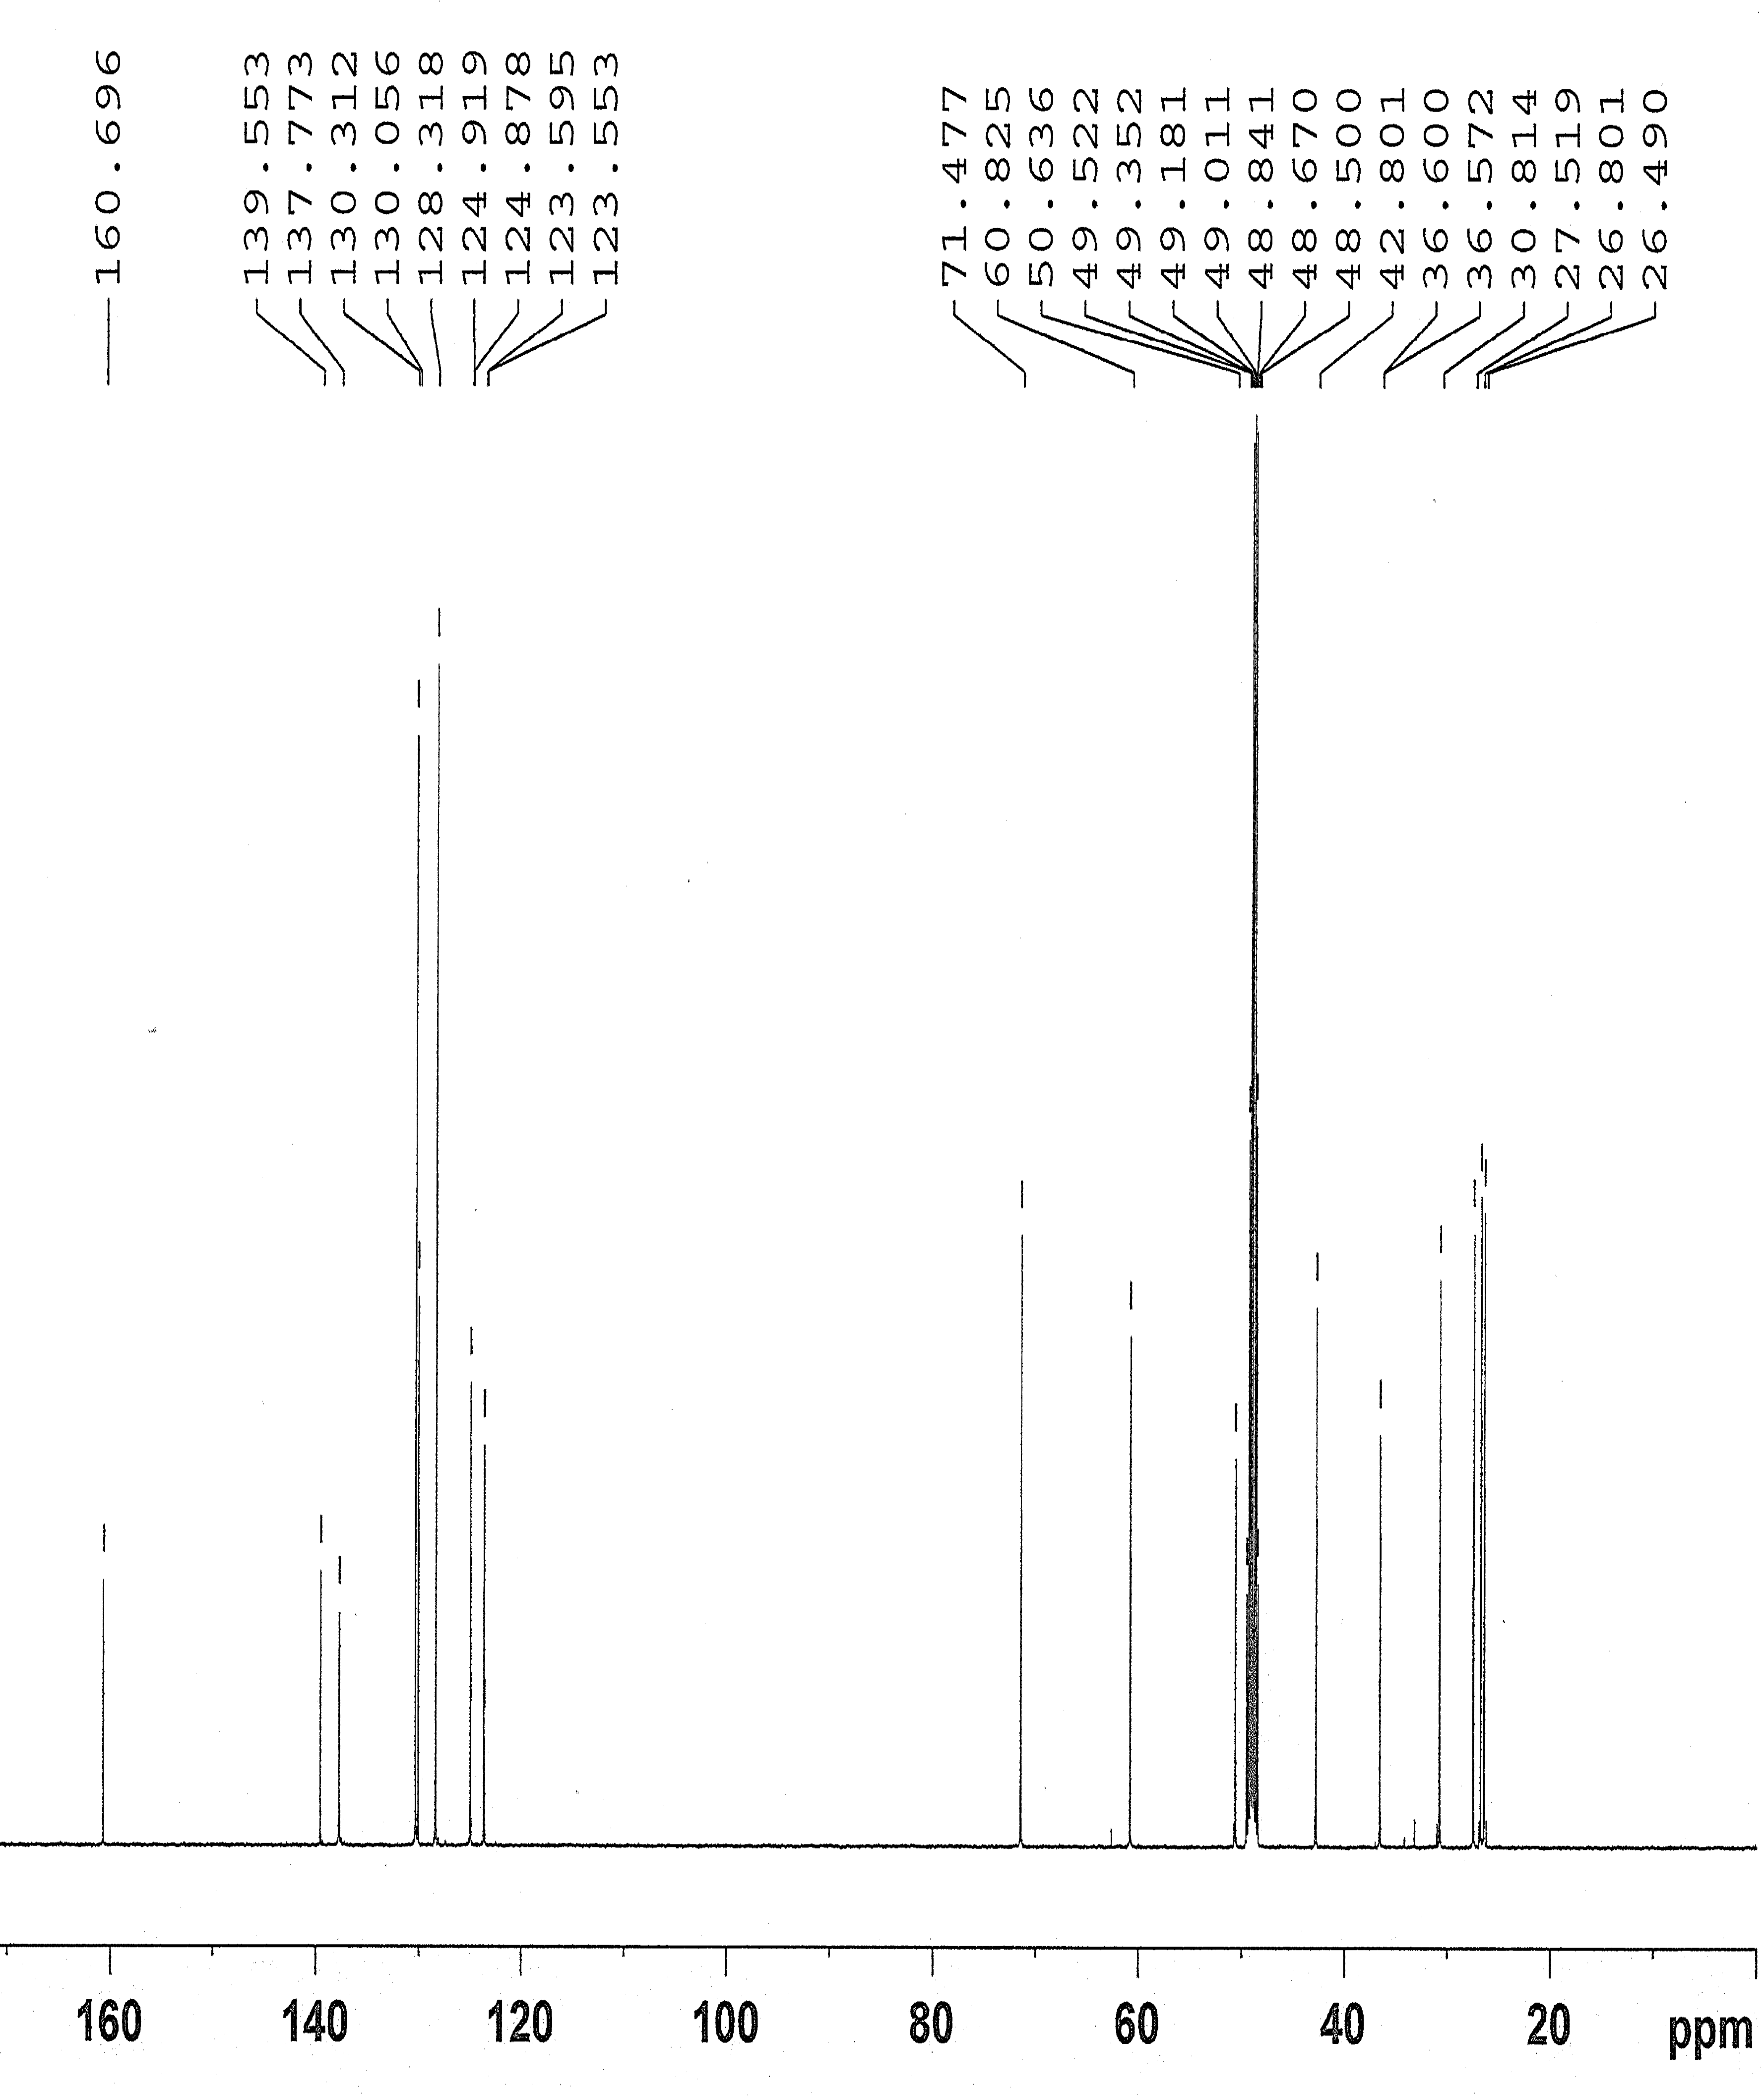


13C NMR of **2b**

**Spectral data of compound (2c):**


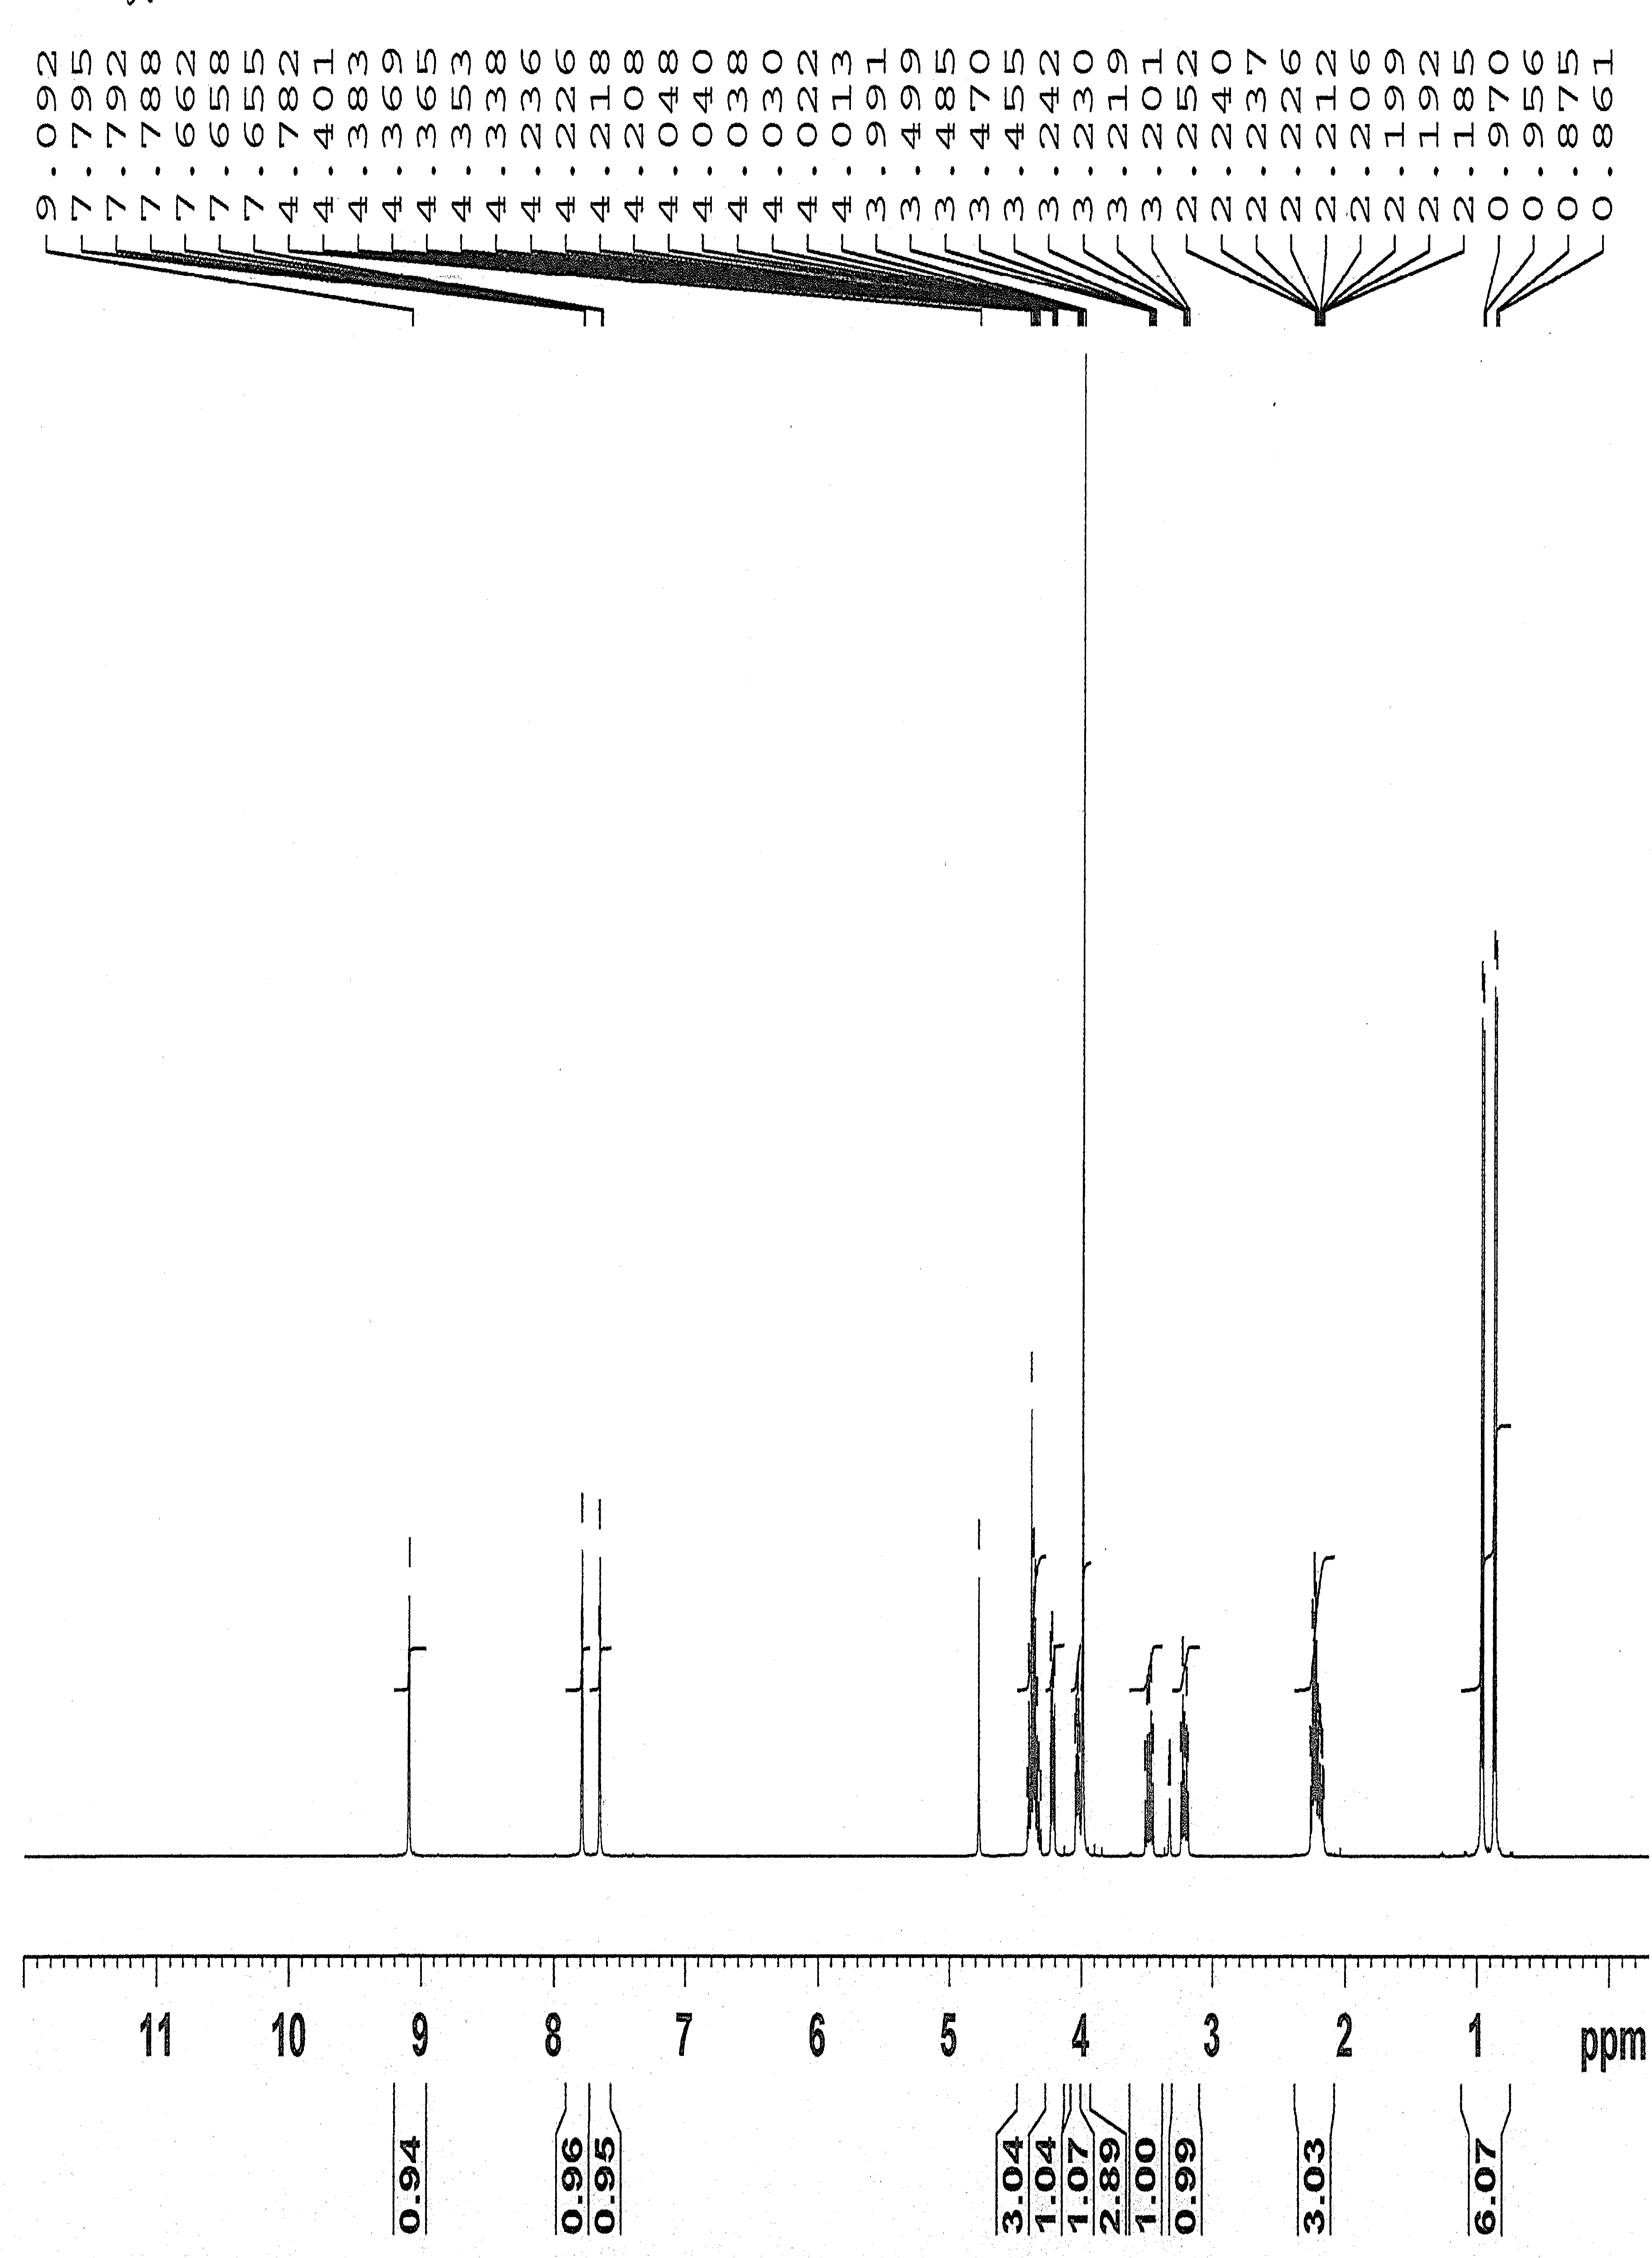


1H NMR of **2c**


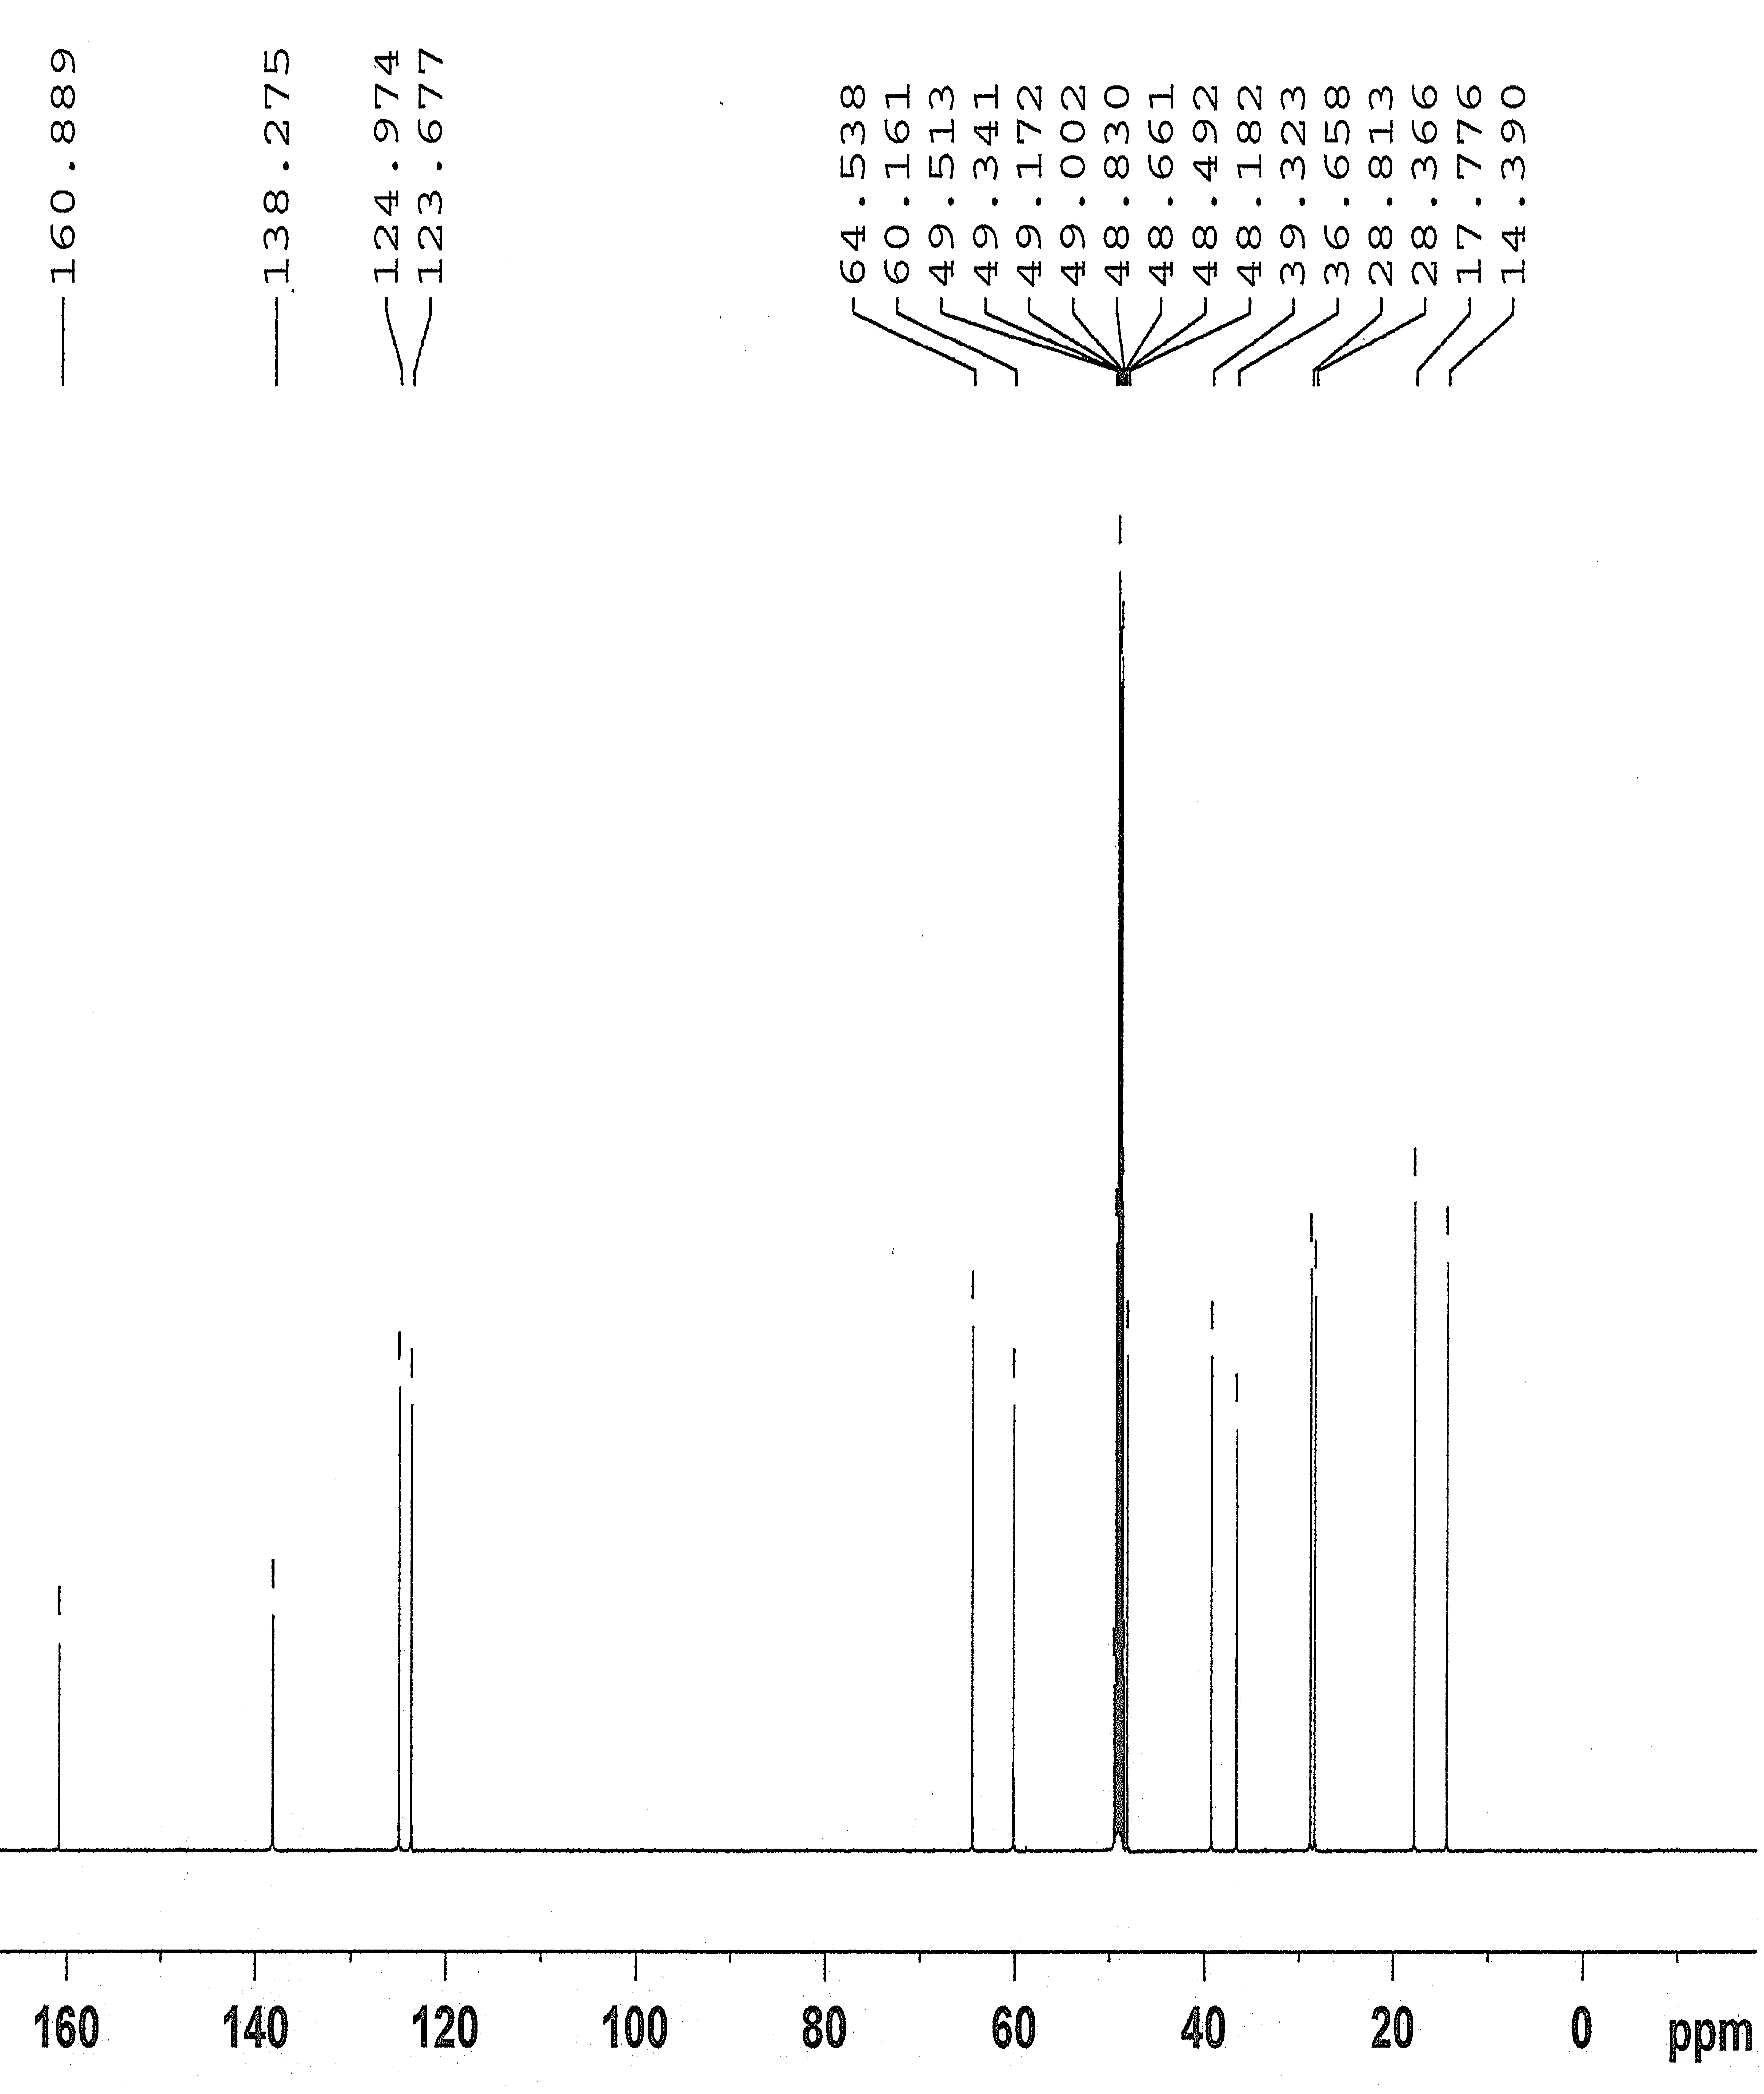


13C NMR of **2c**

**Spectral data of compound (2d):**


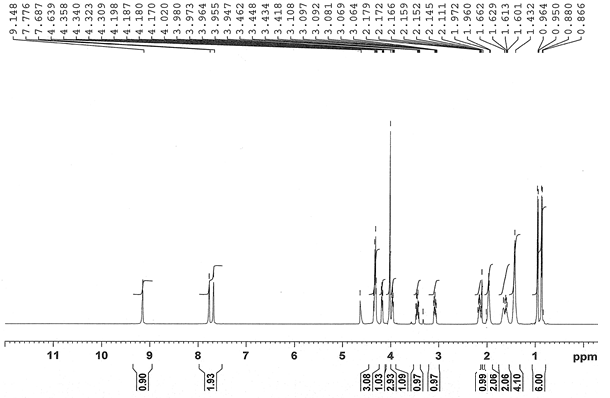


1H NMR of **2d**


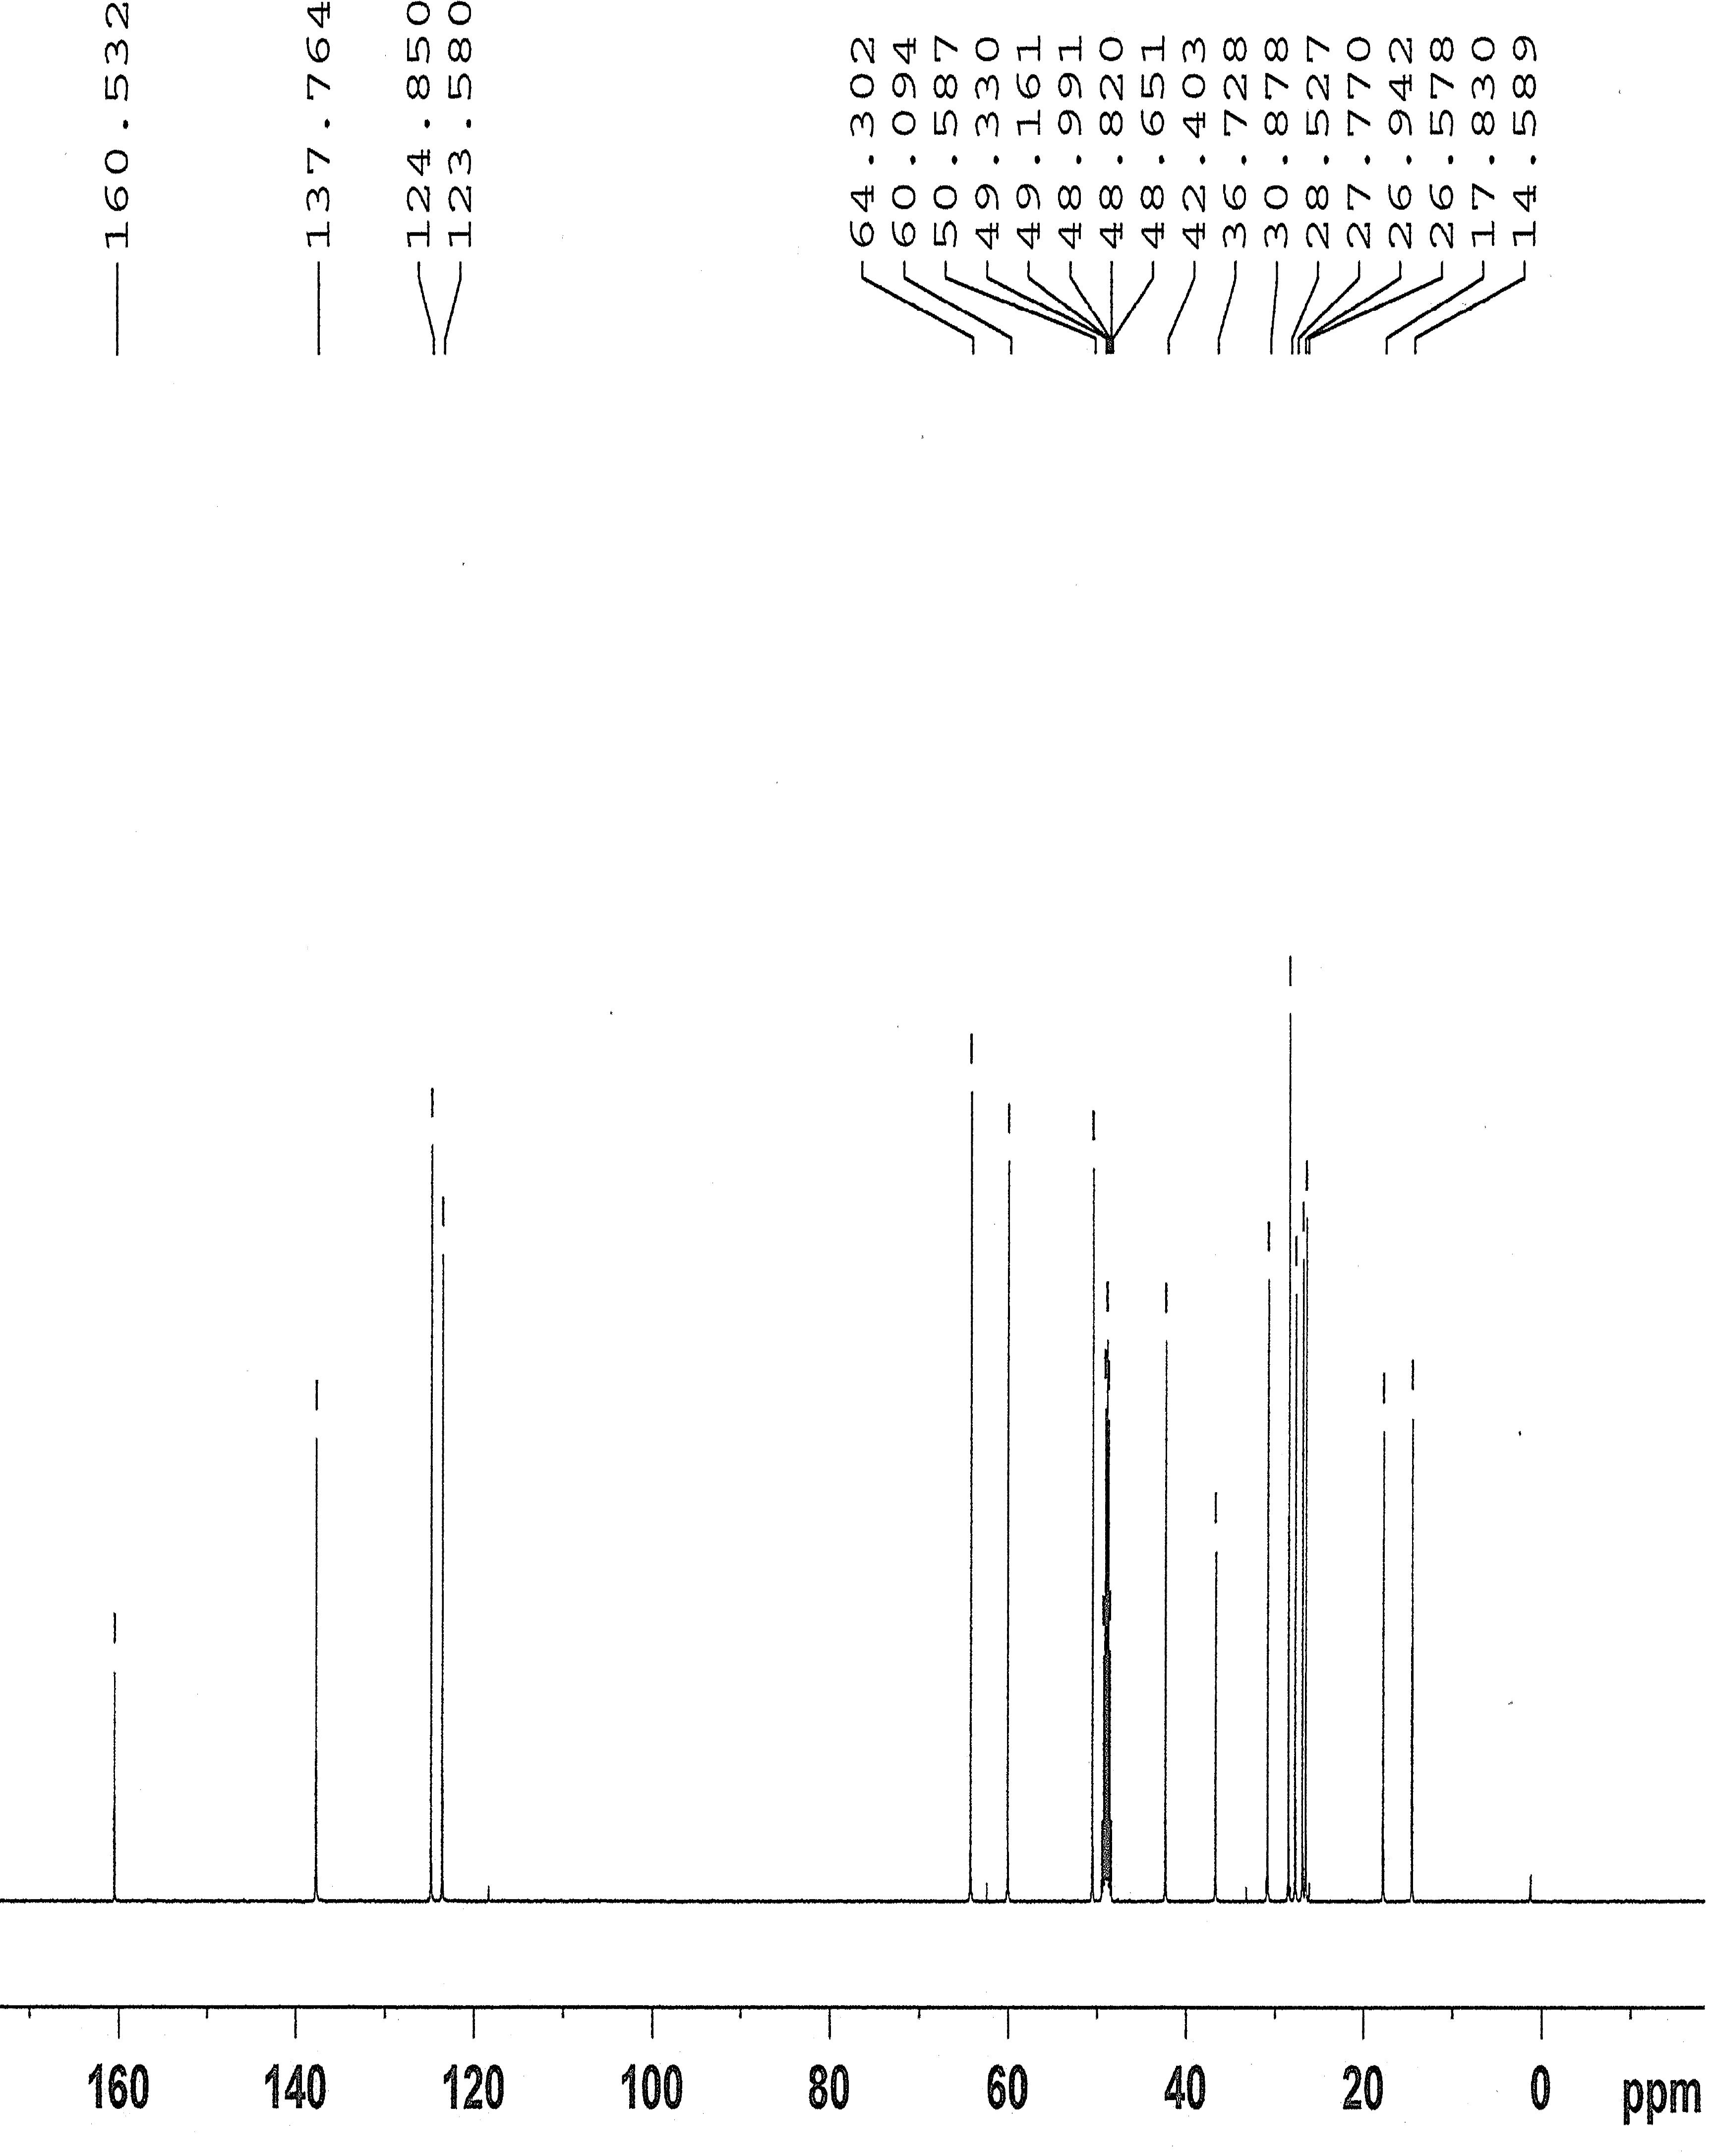


13C NMR of **2d**

**Spectral data of compound (2e):**


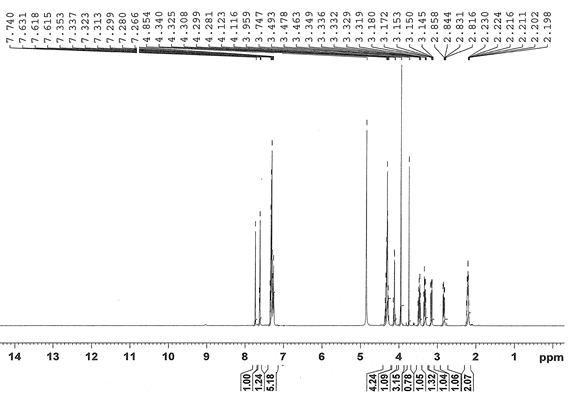


1H NMR of **2e**


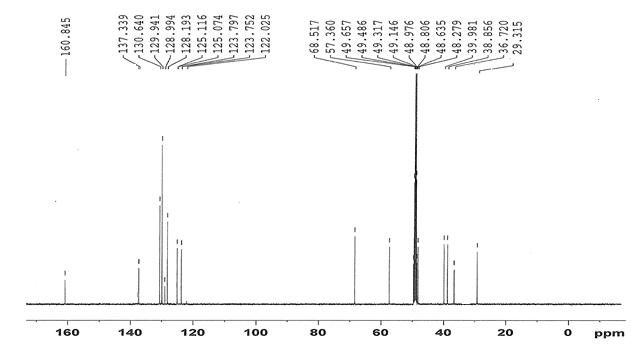


13C NMR of **2e**

**Spectral data of compound (2f):**


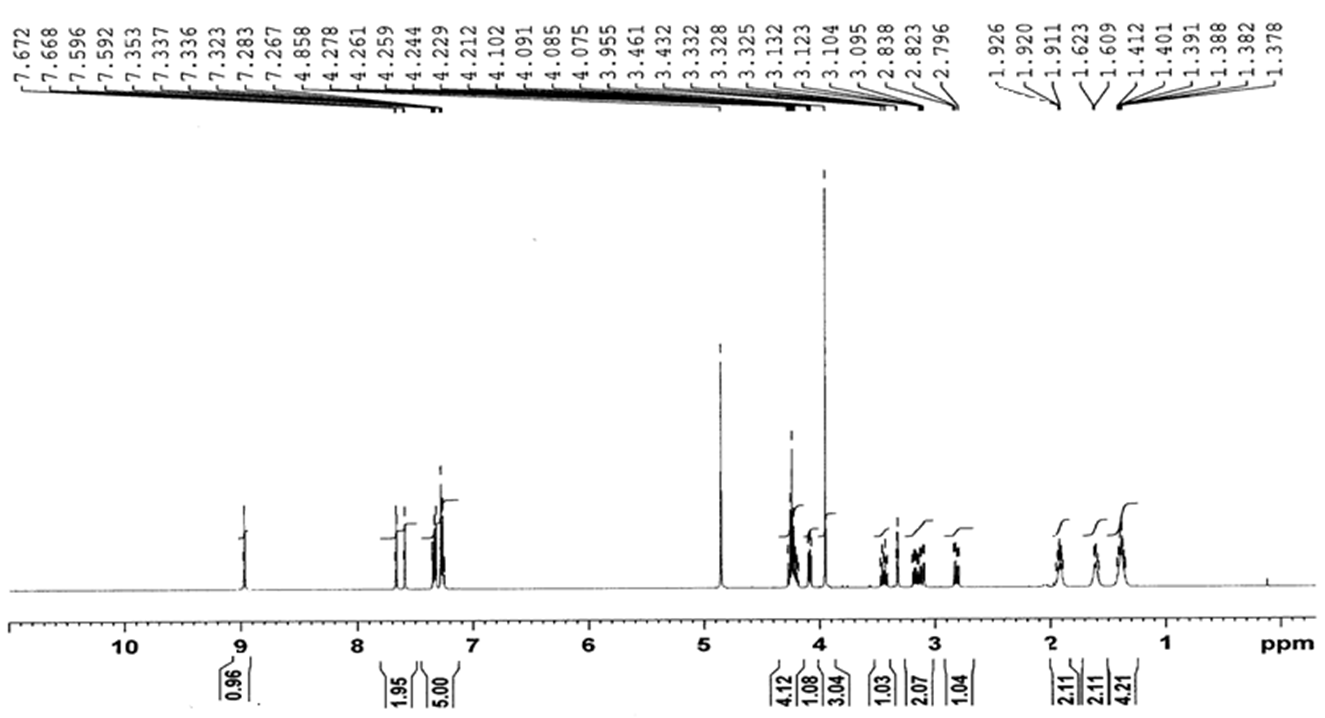


1H NMR of **2f**


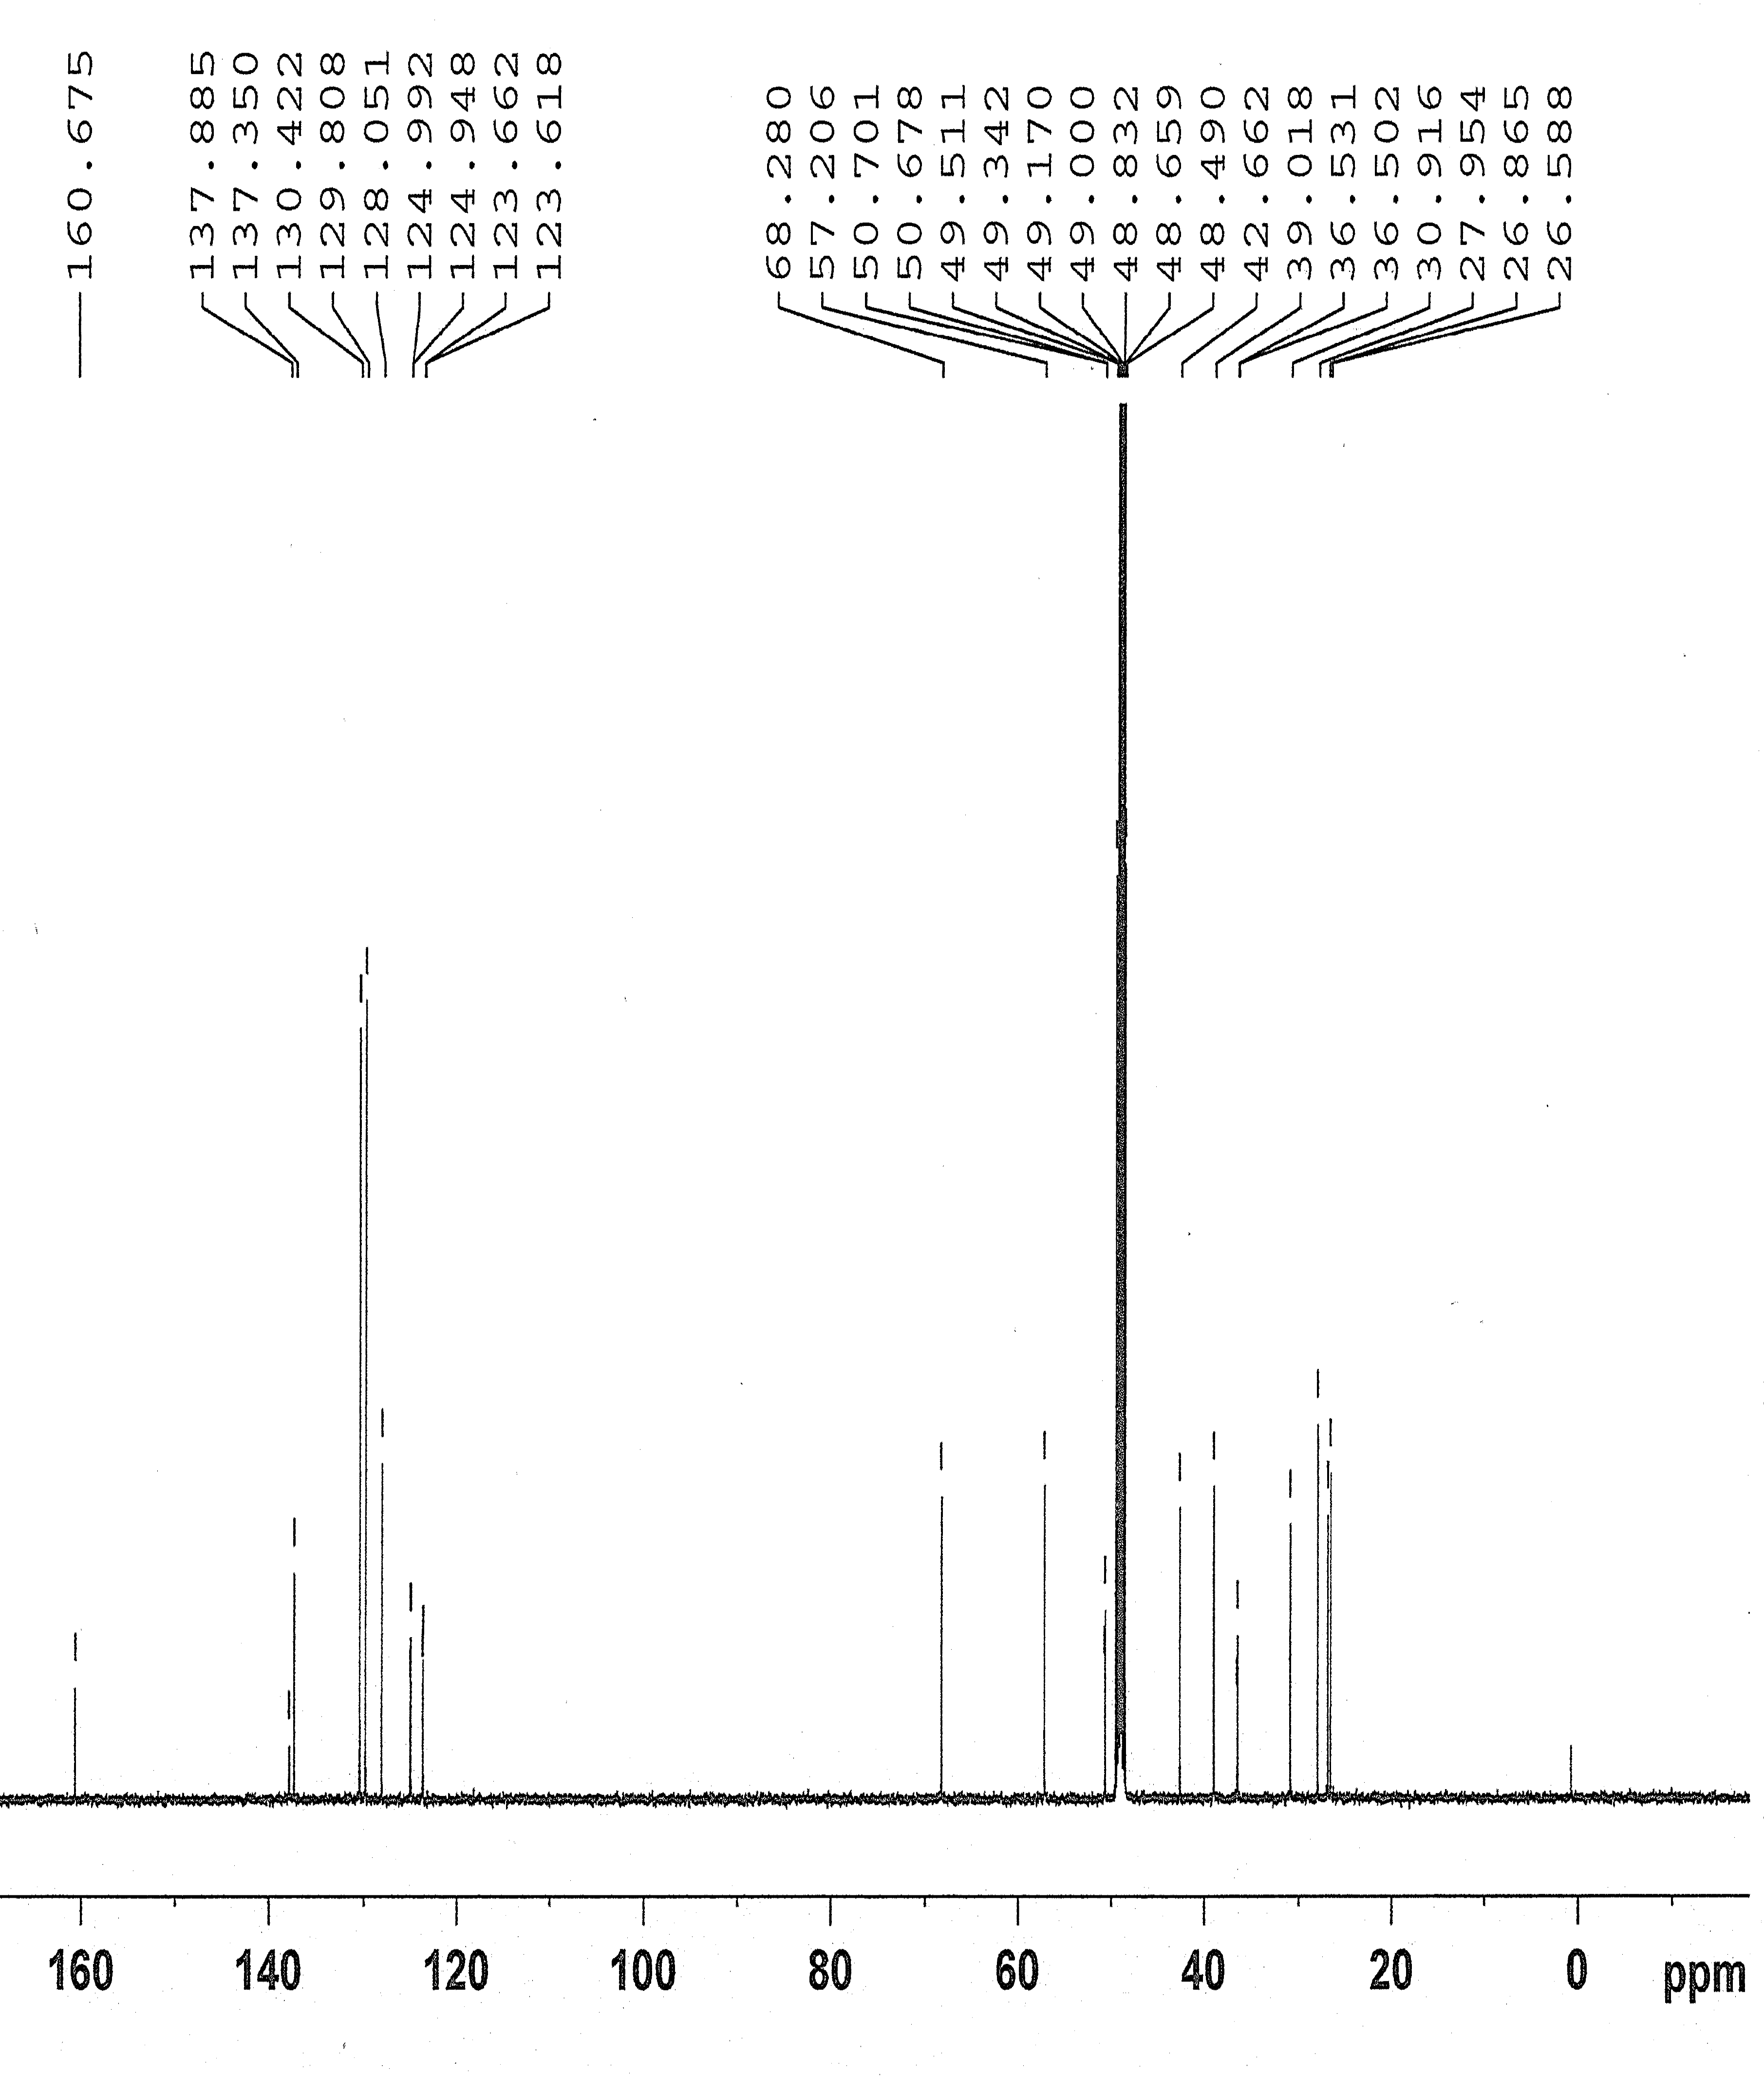


13C NMR of **2f**

**Spectral data of compound (2g):**


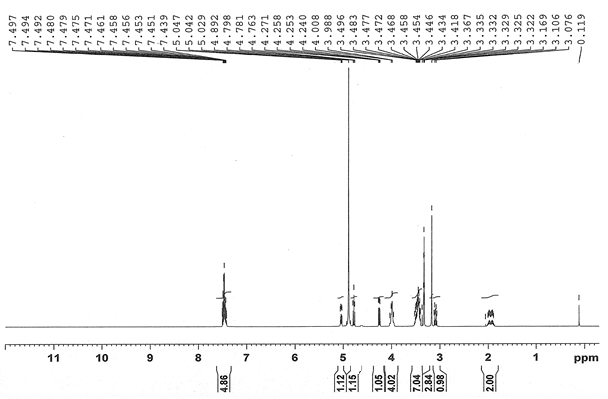


1H NMR of **2g**


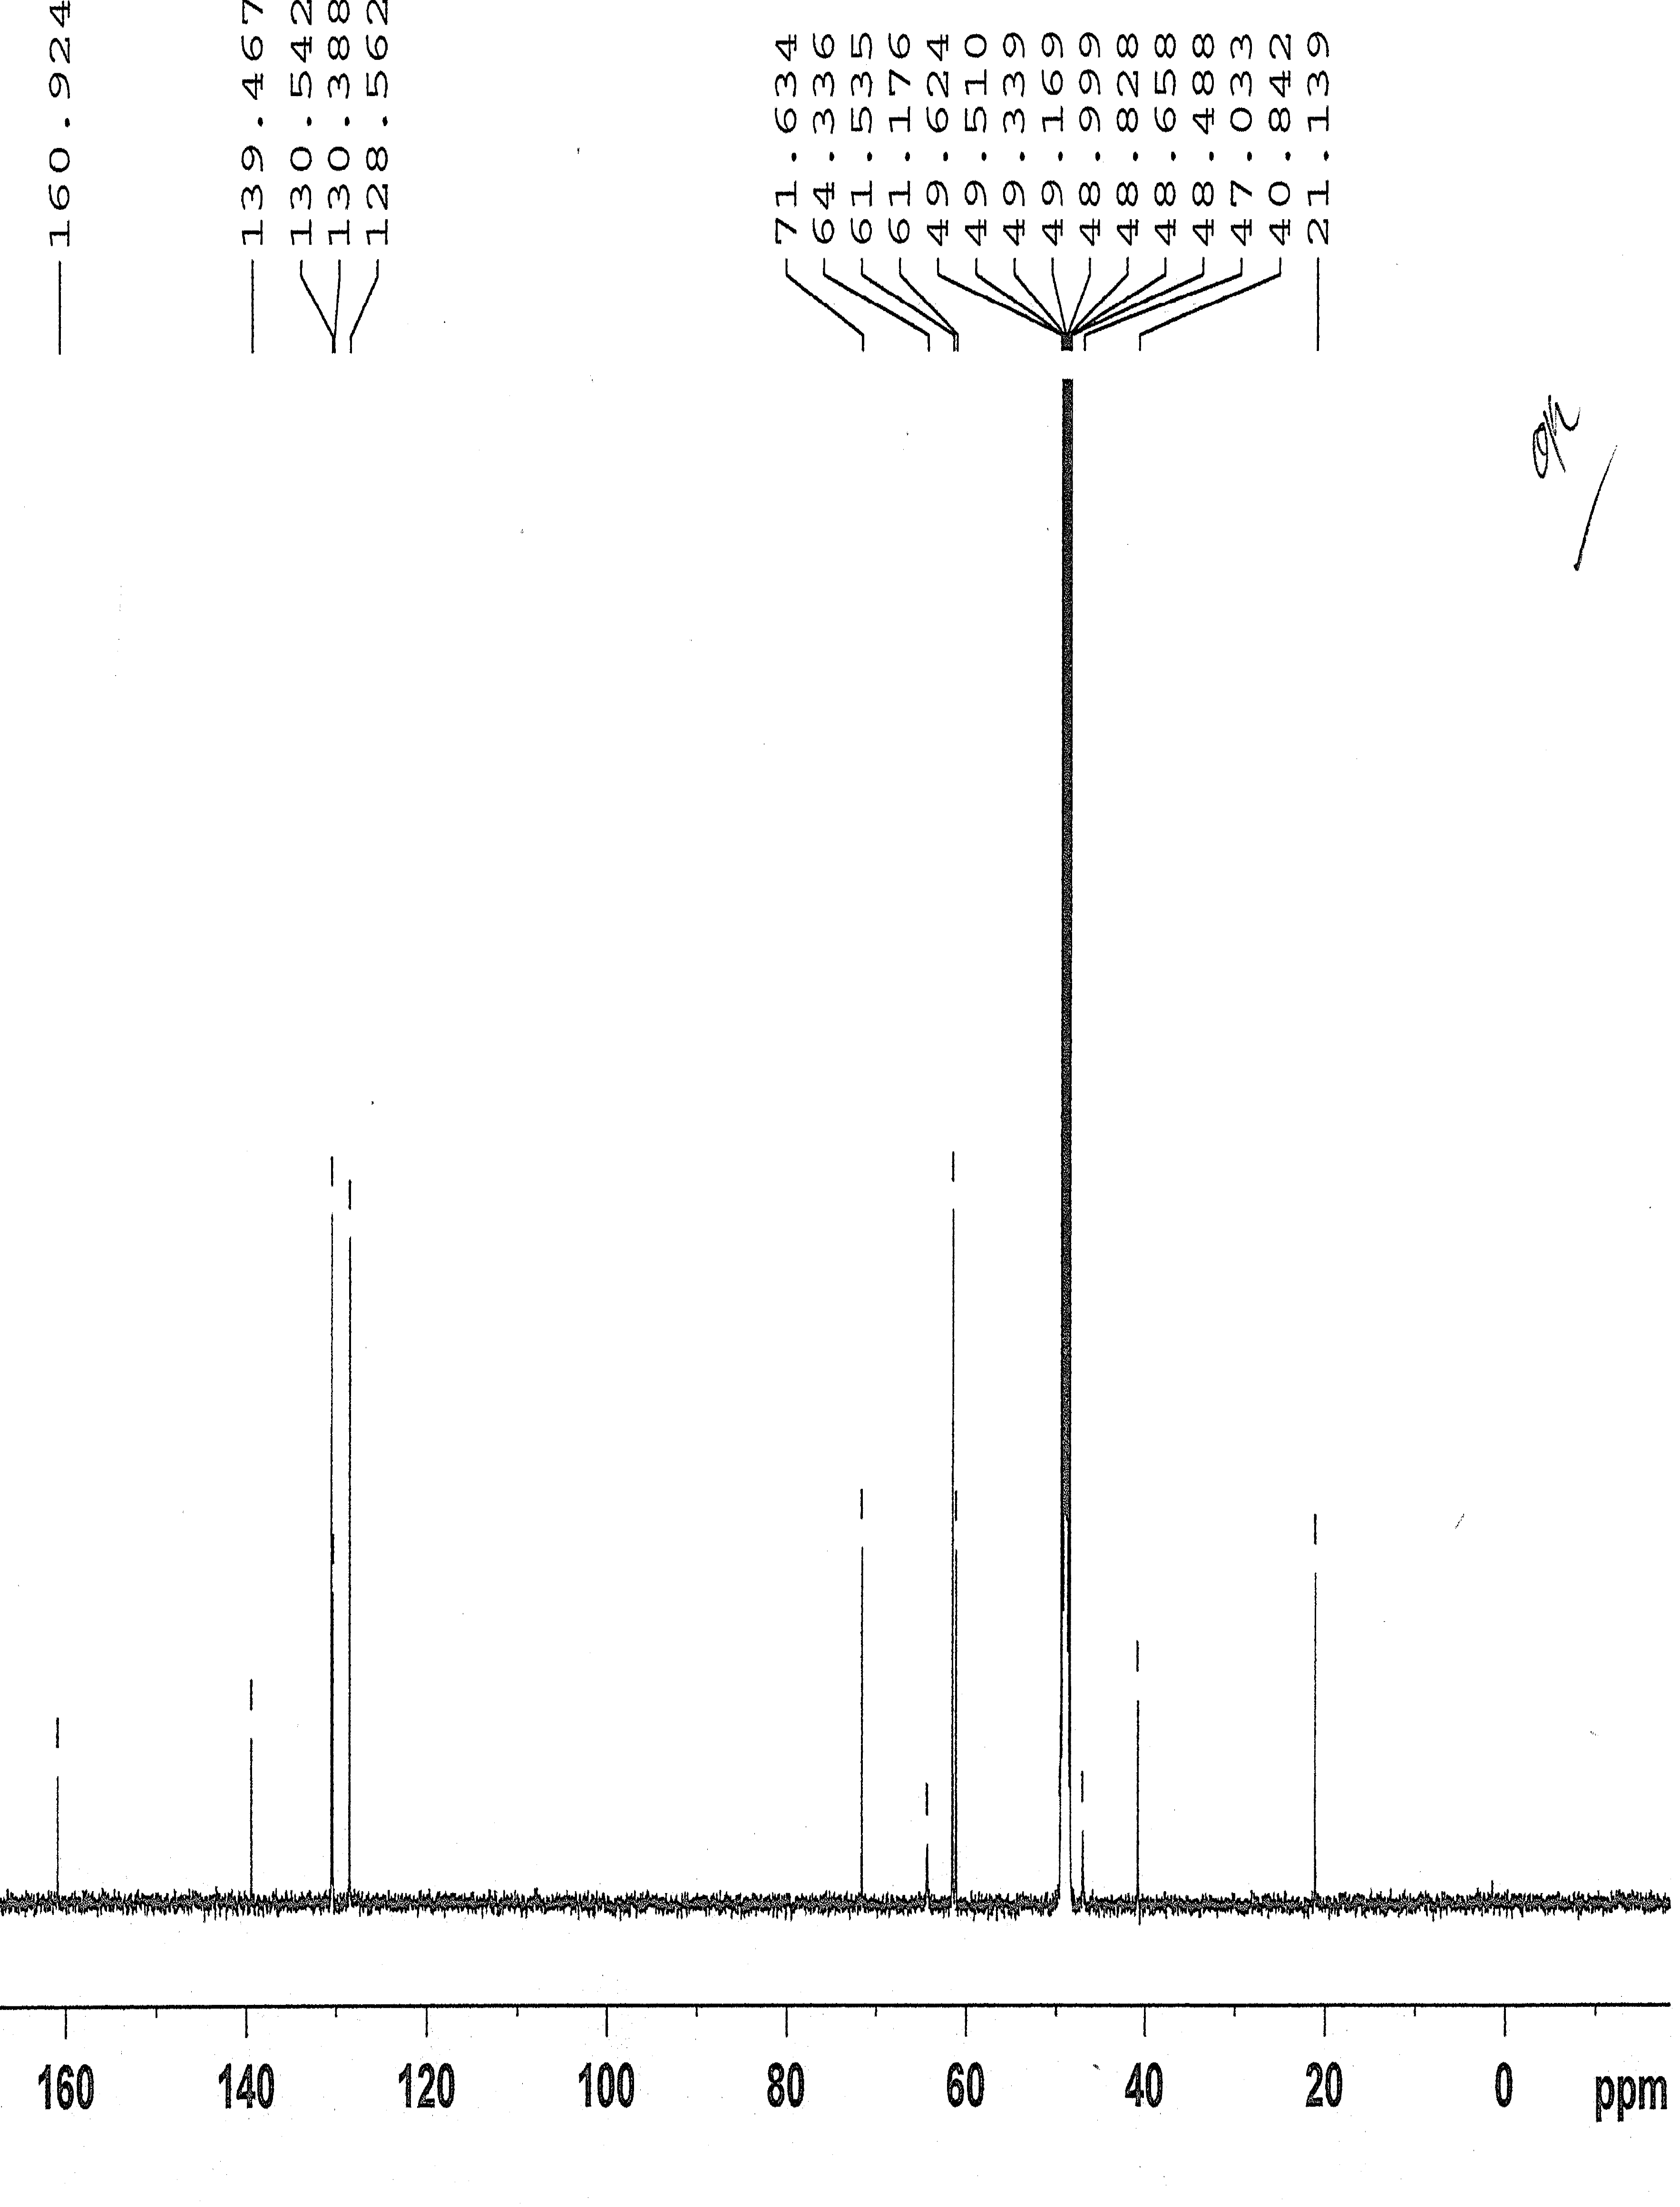


13C NMR of **2g**

**Spectral data of compound (2h):**


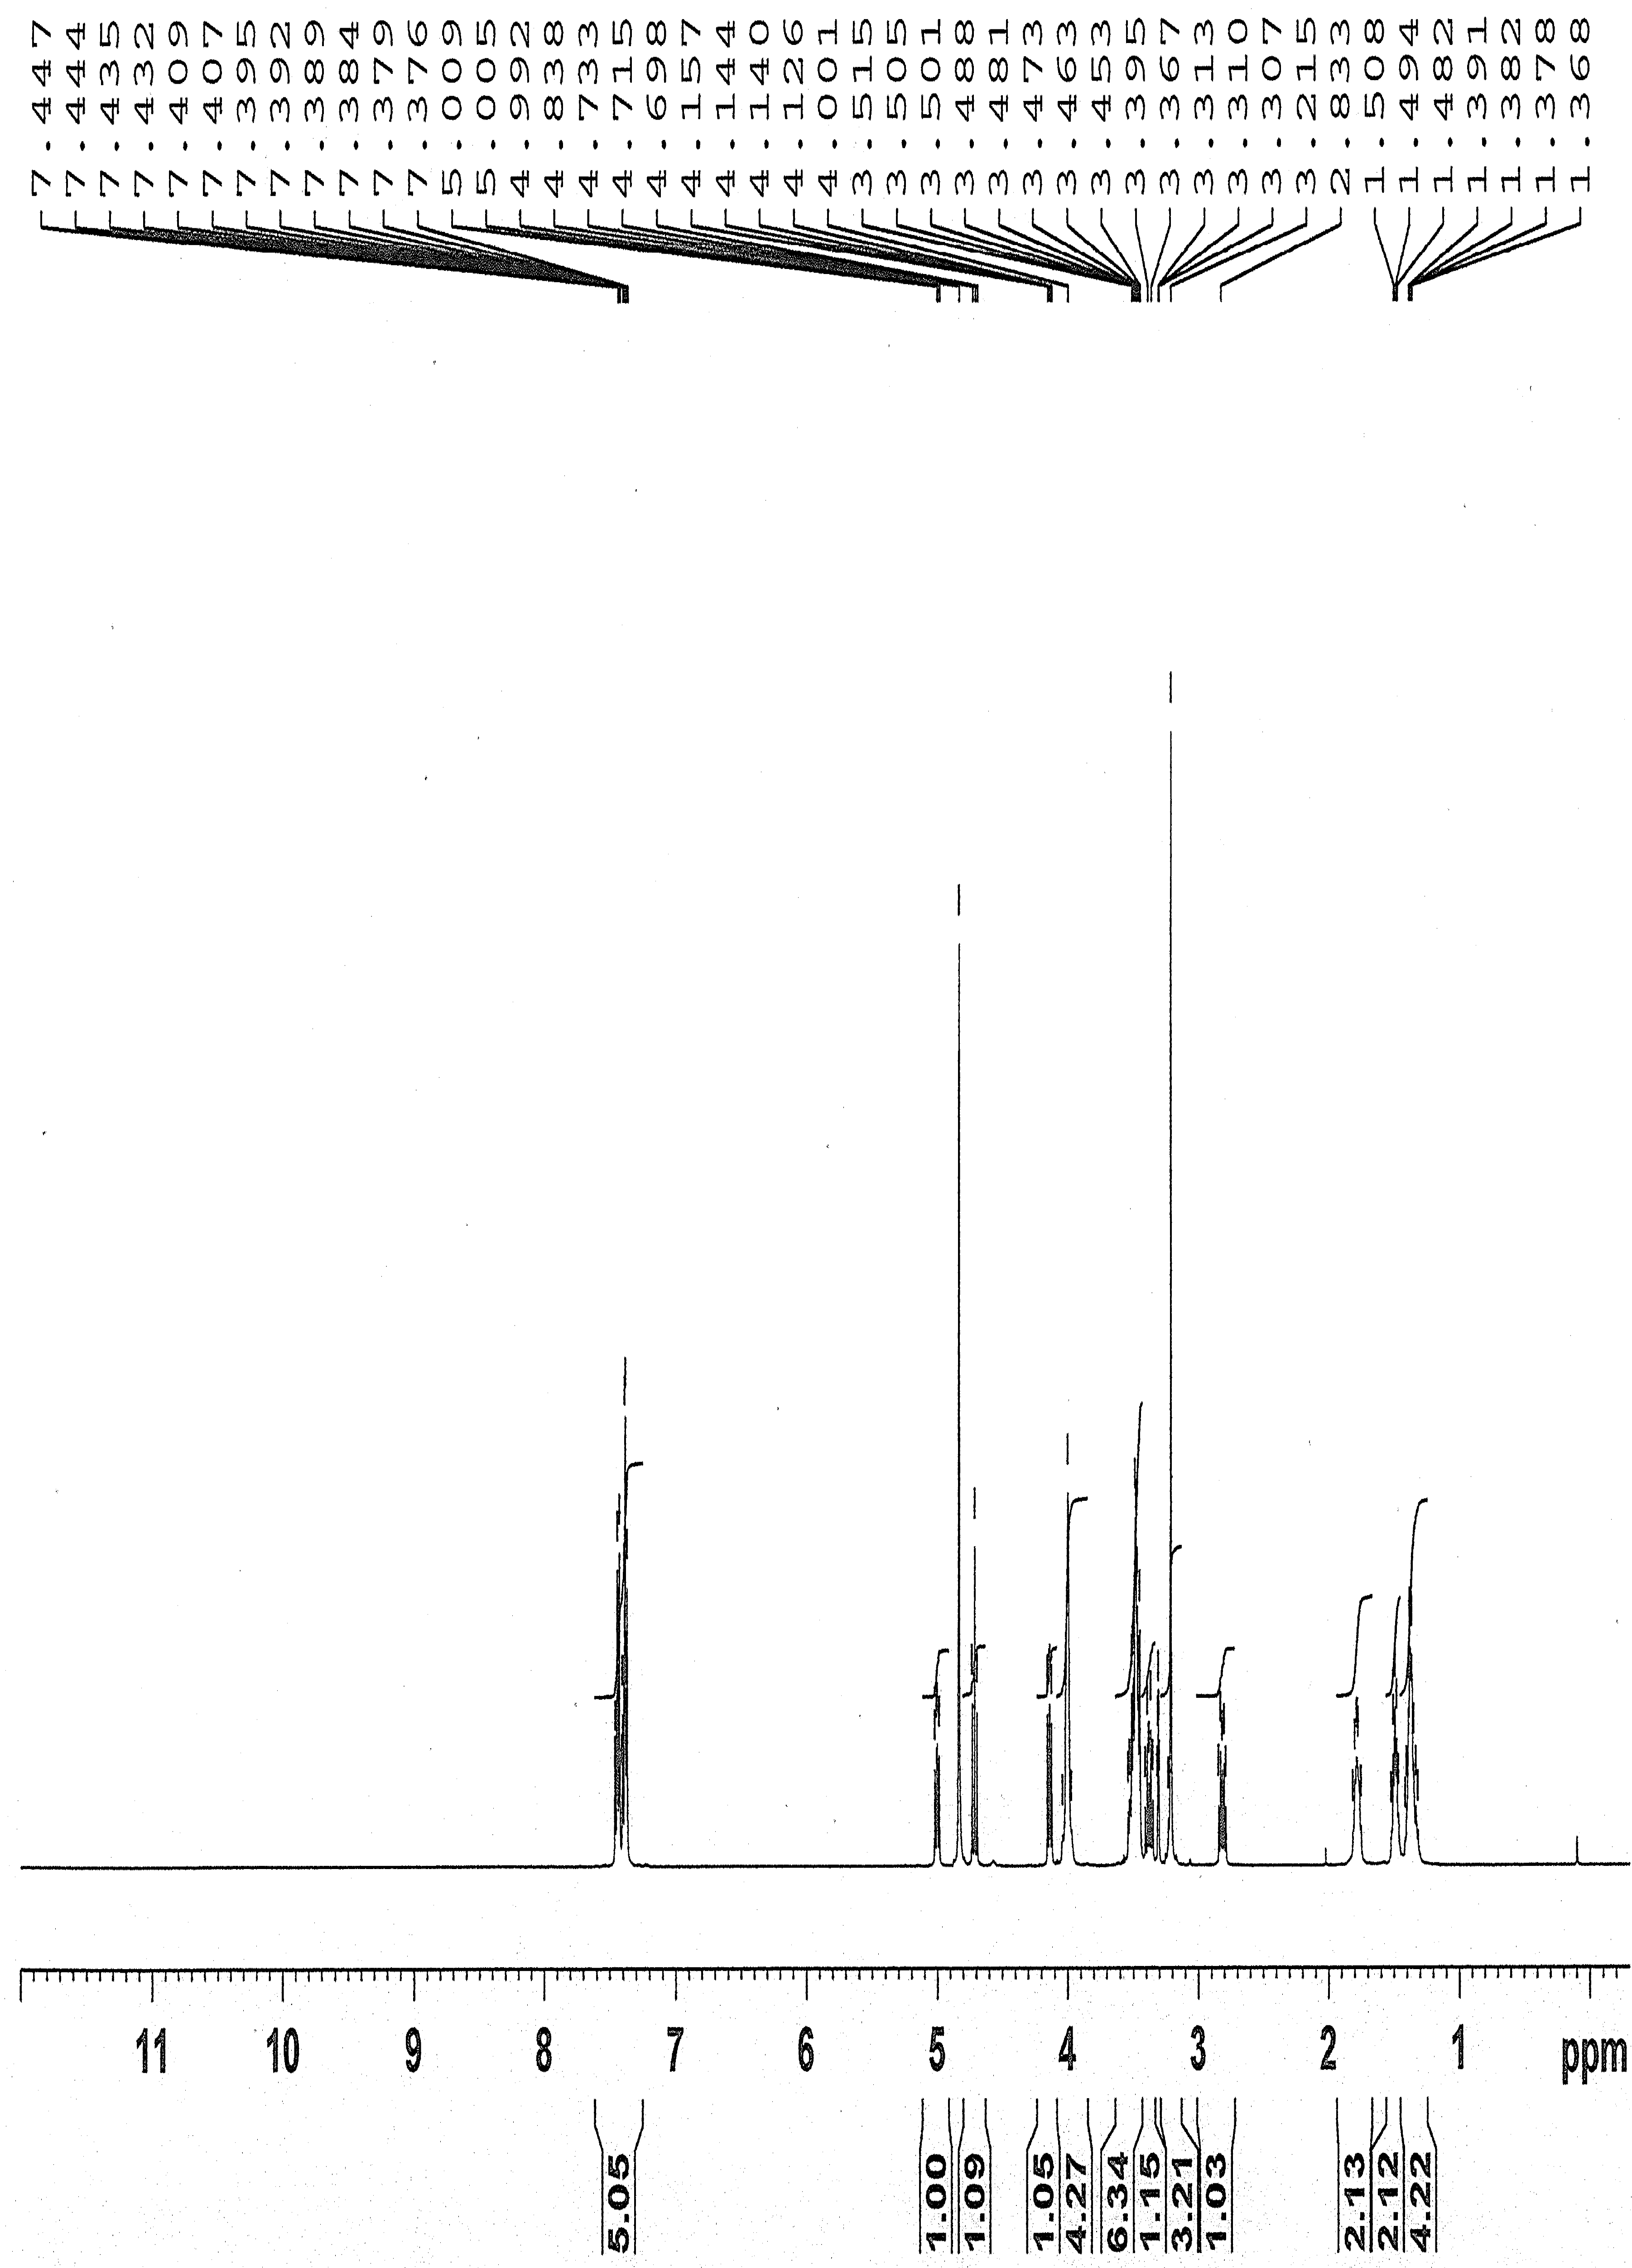


1H NMR of **2h**


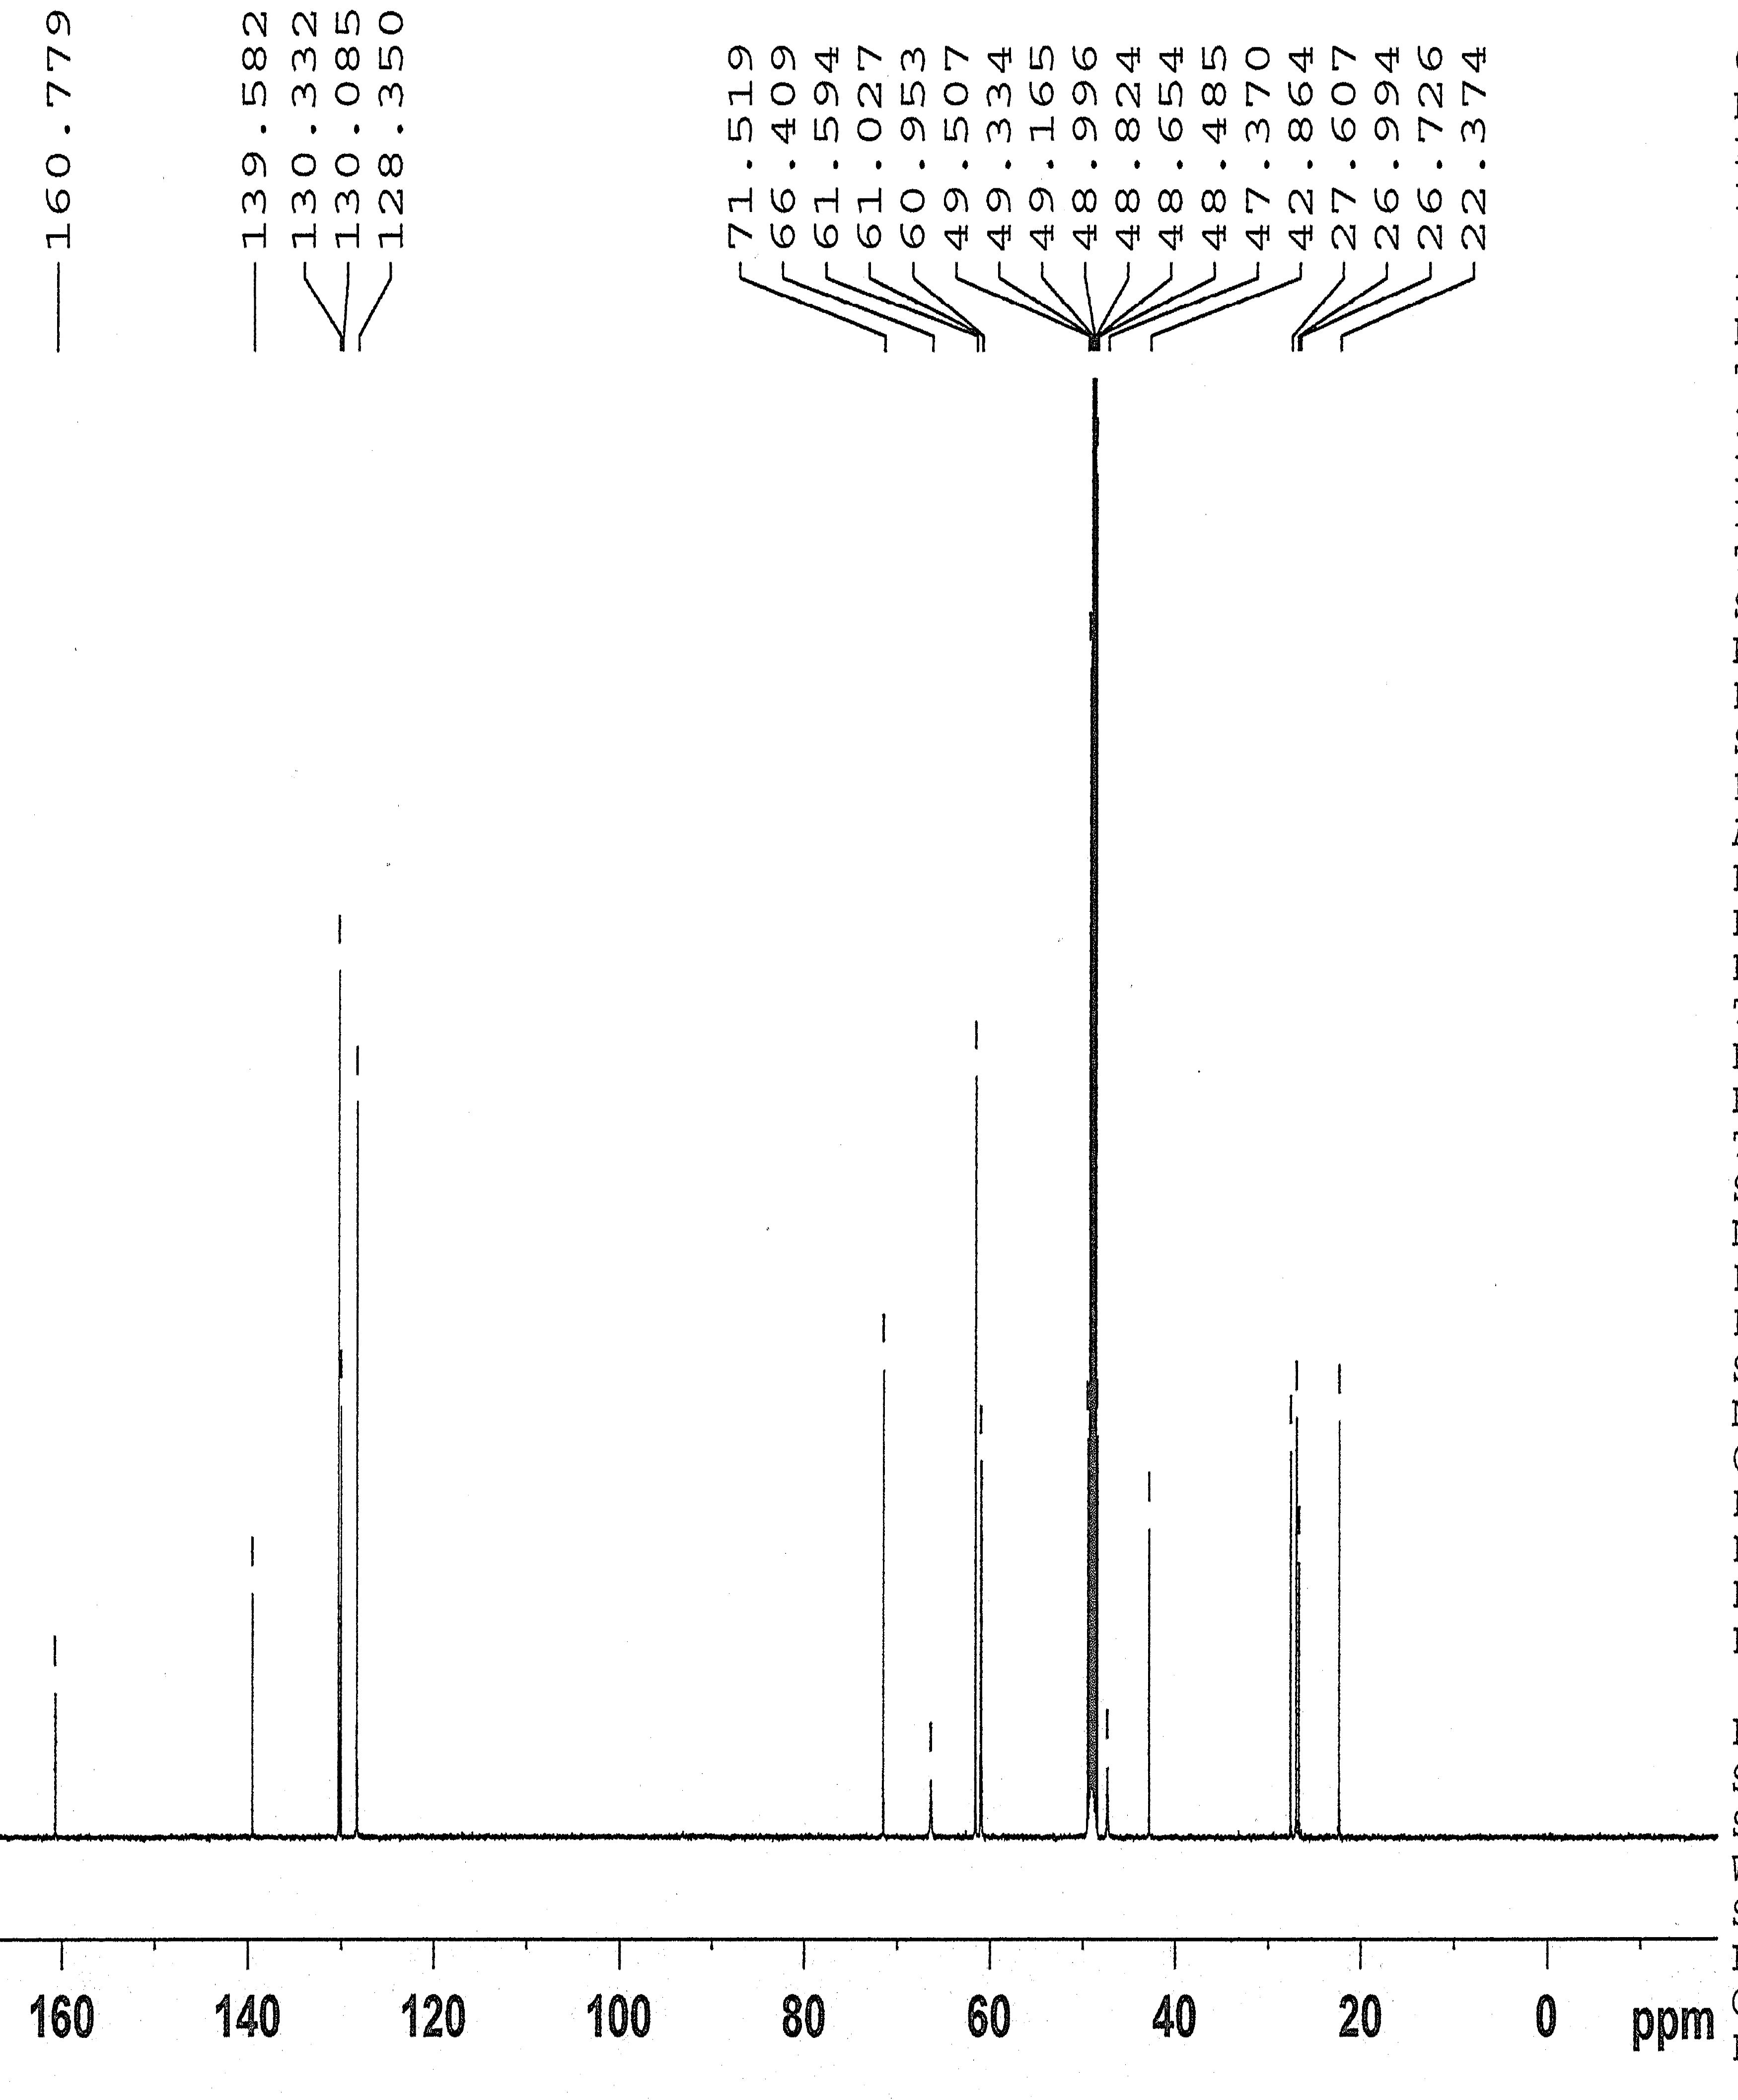


13C NMR of **2h**

**Spectral data of compound (2i):**


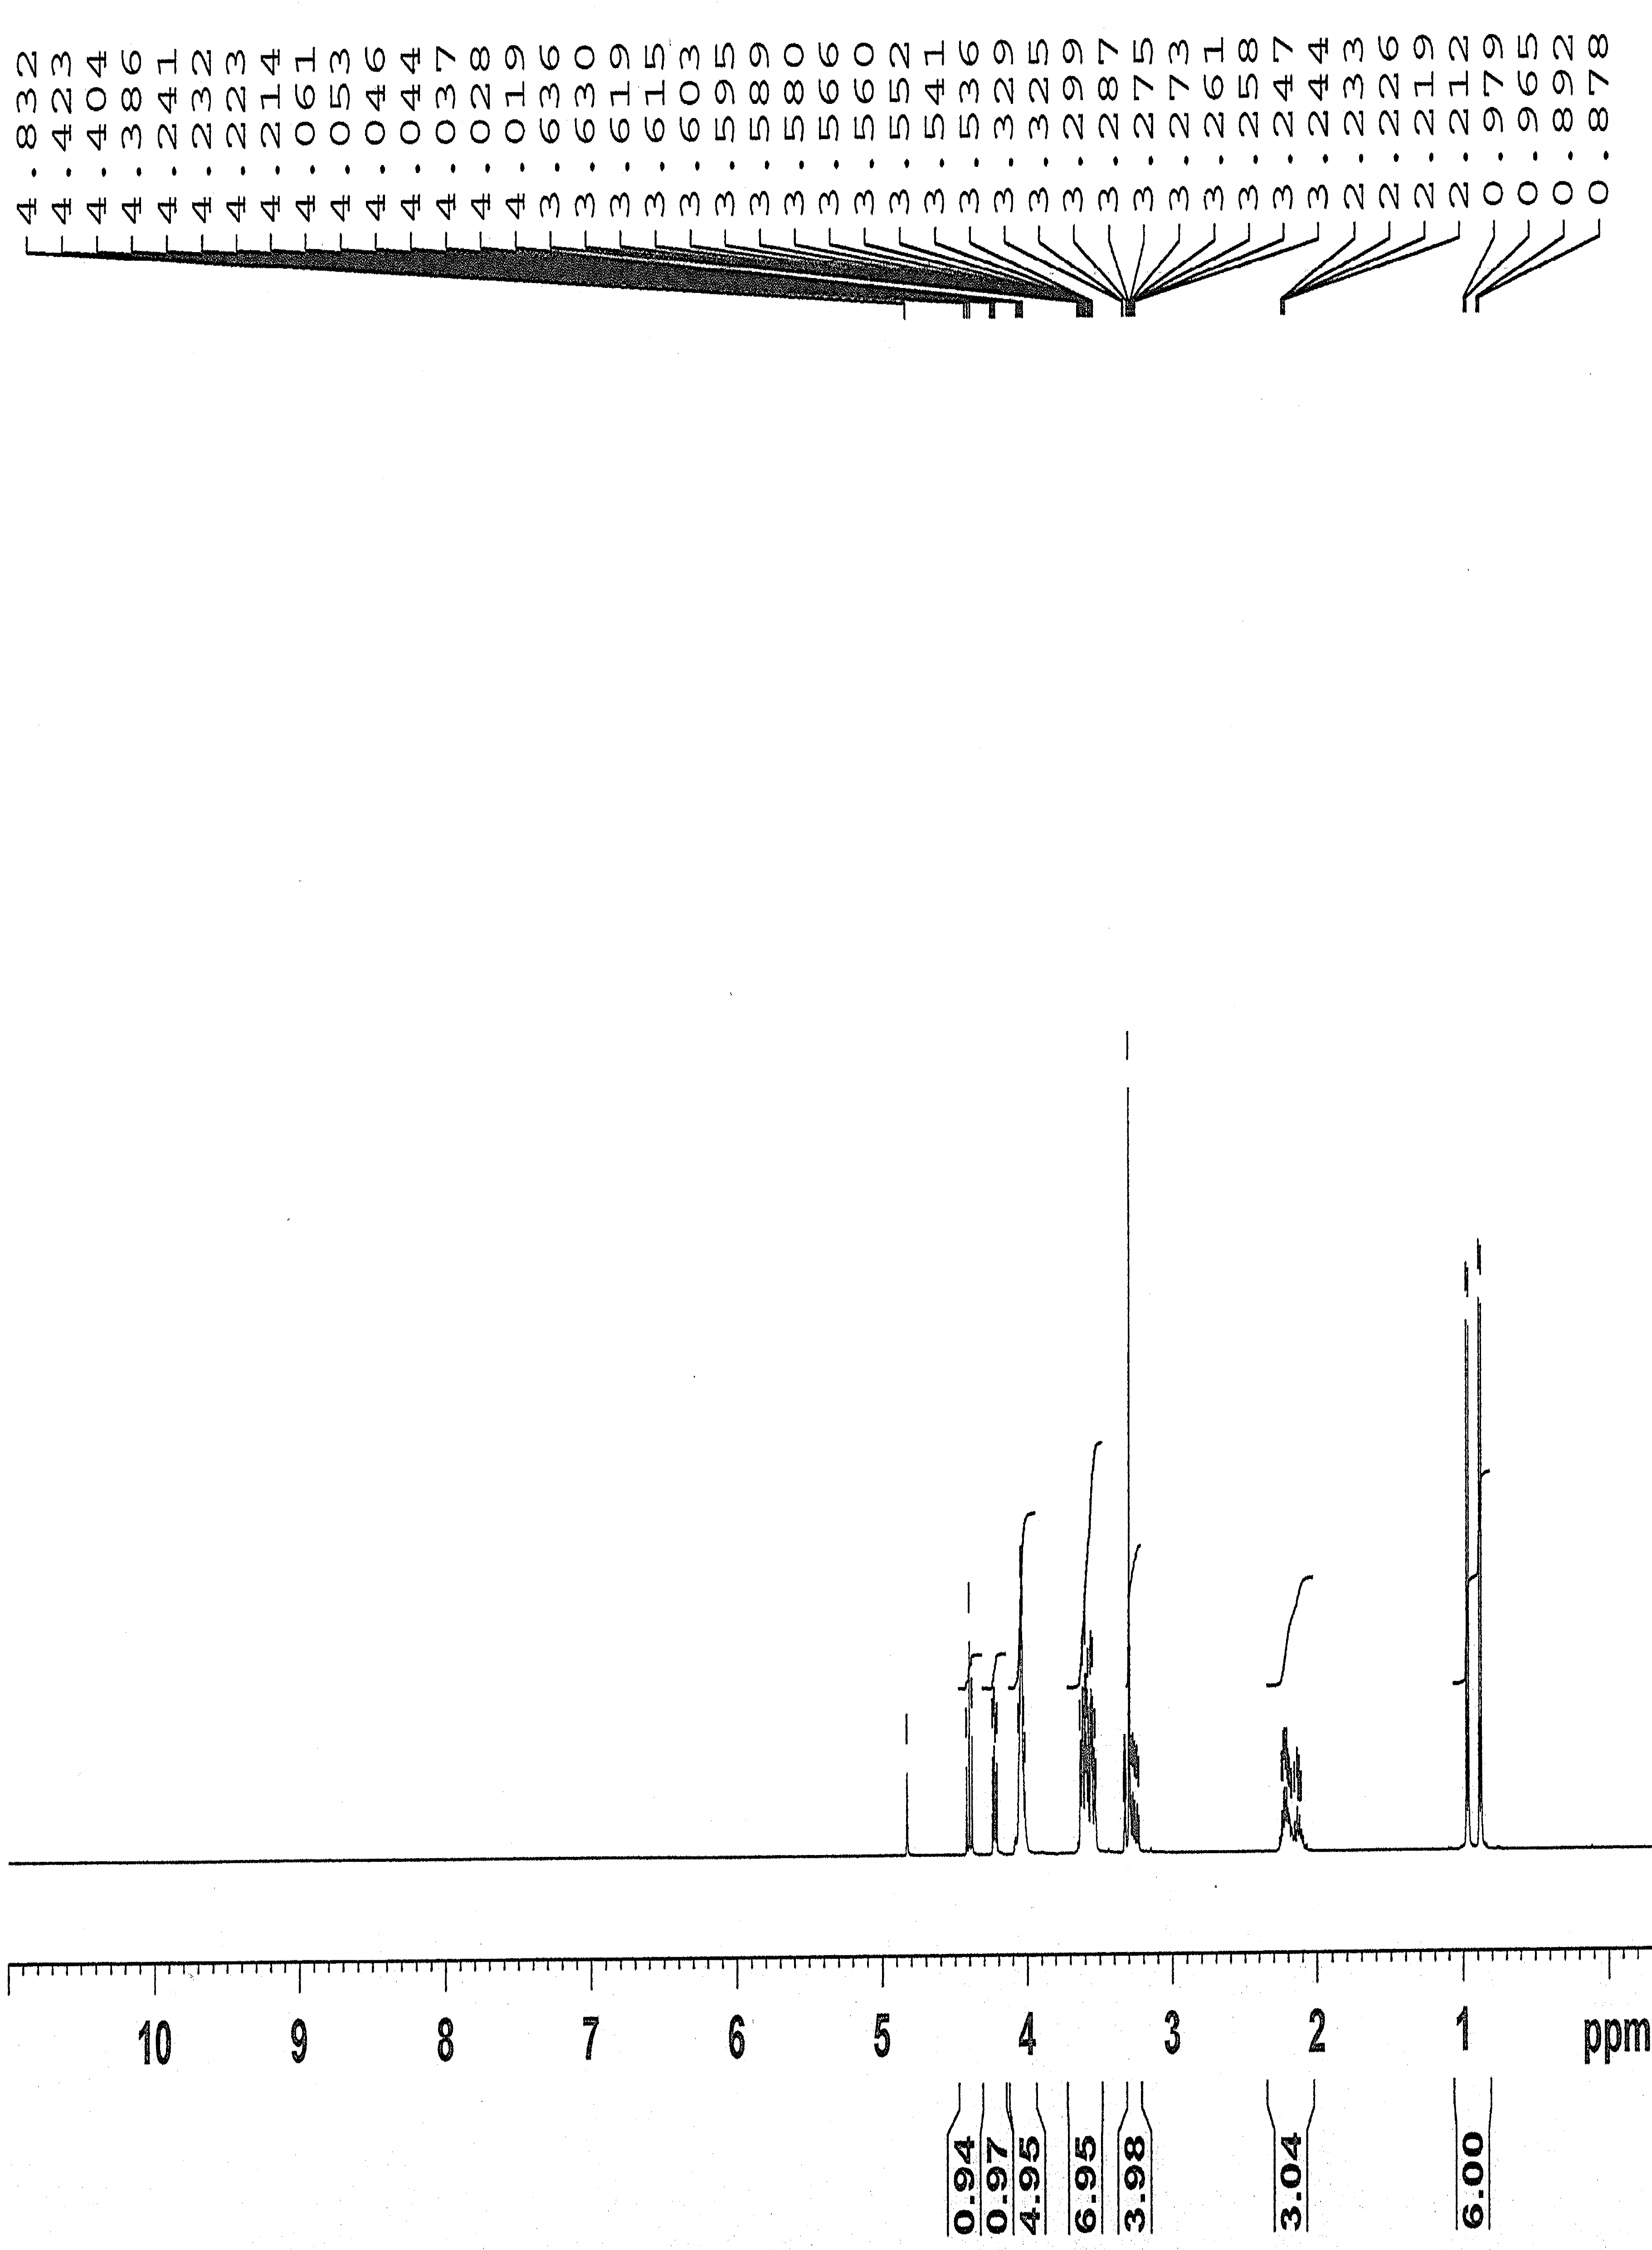


1H NMR of **2i**


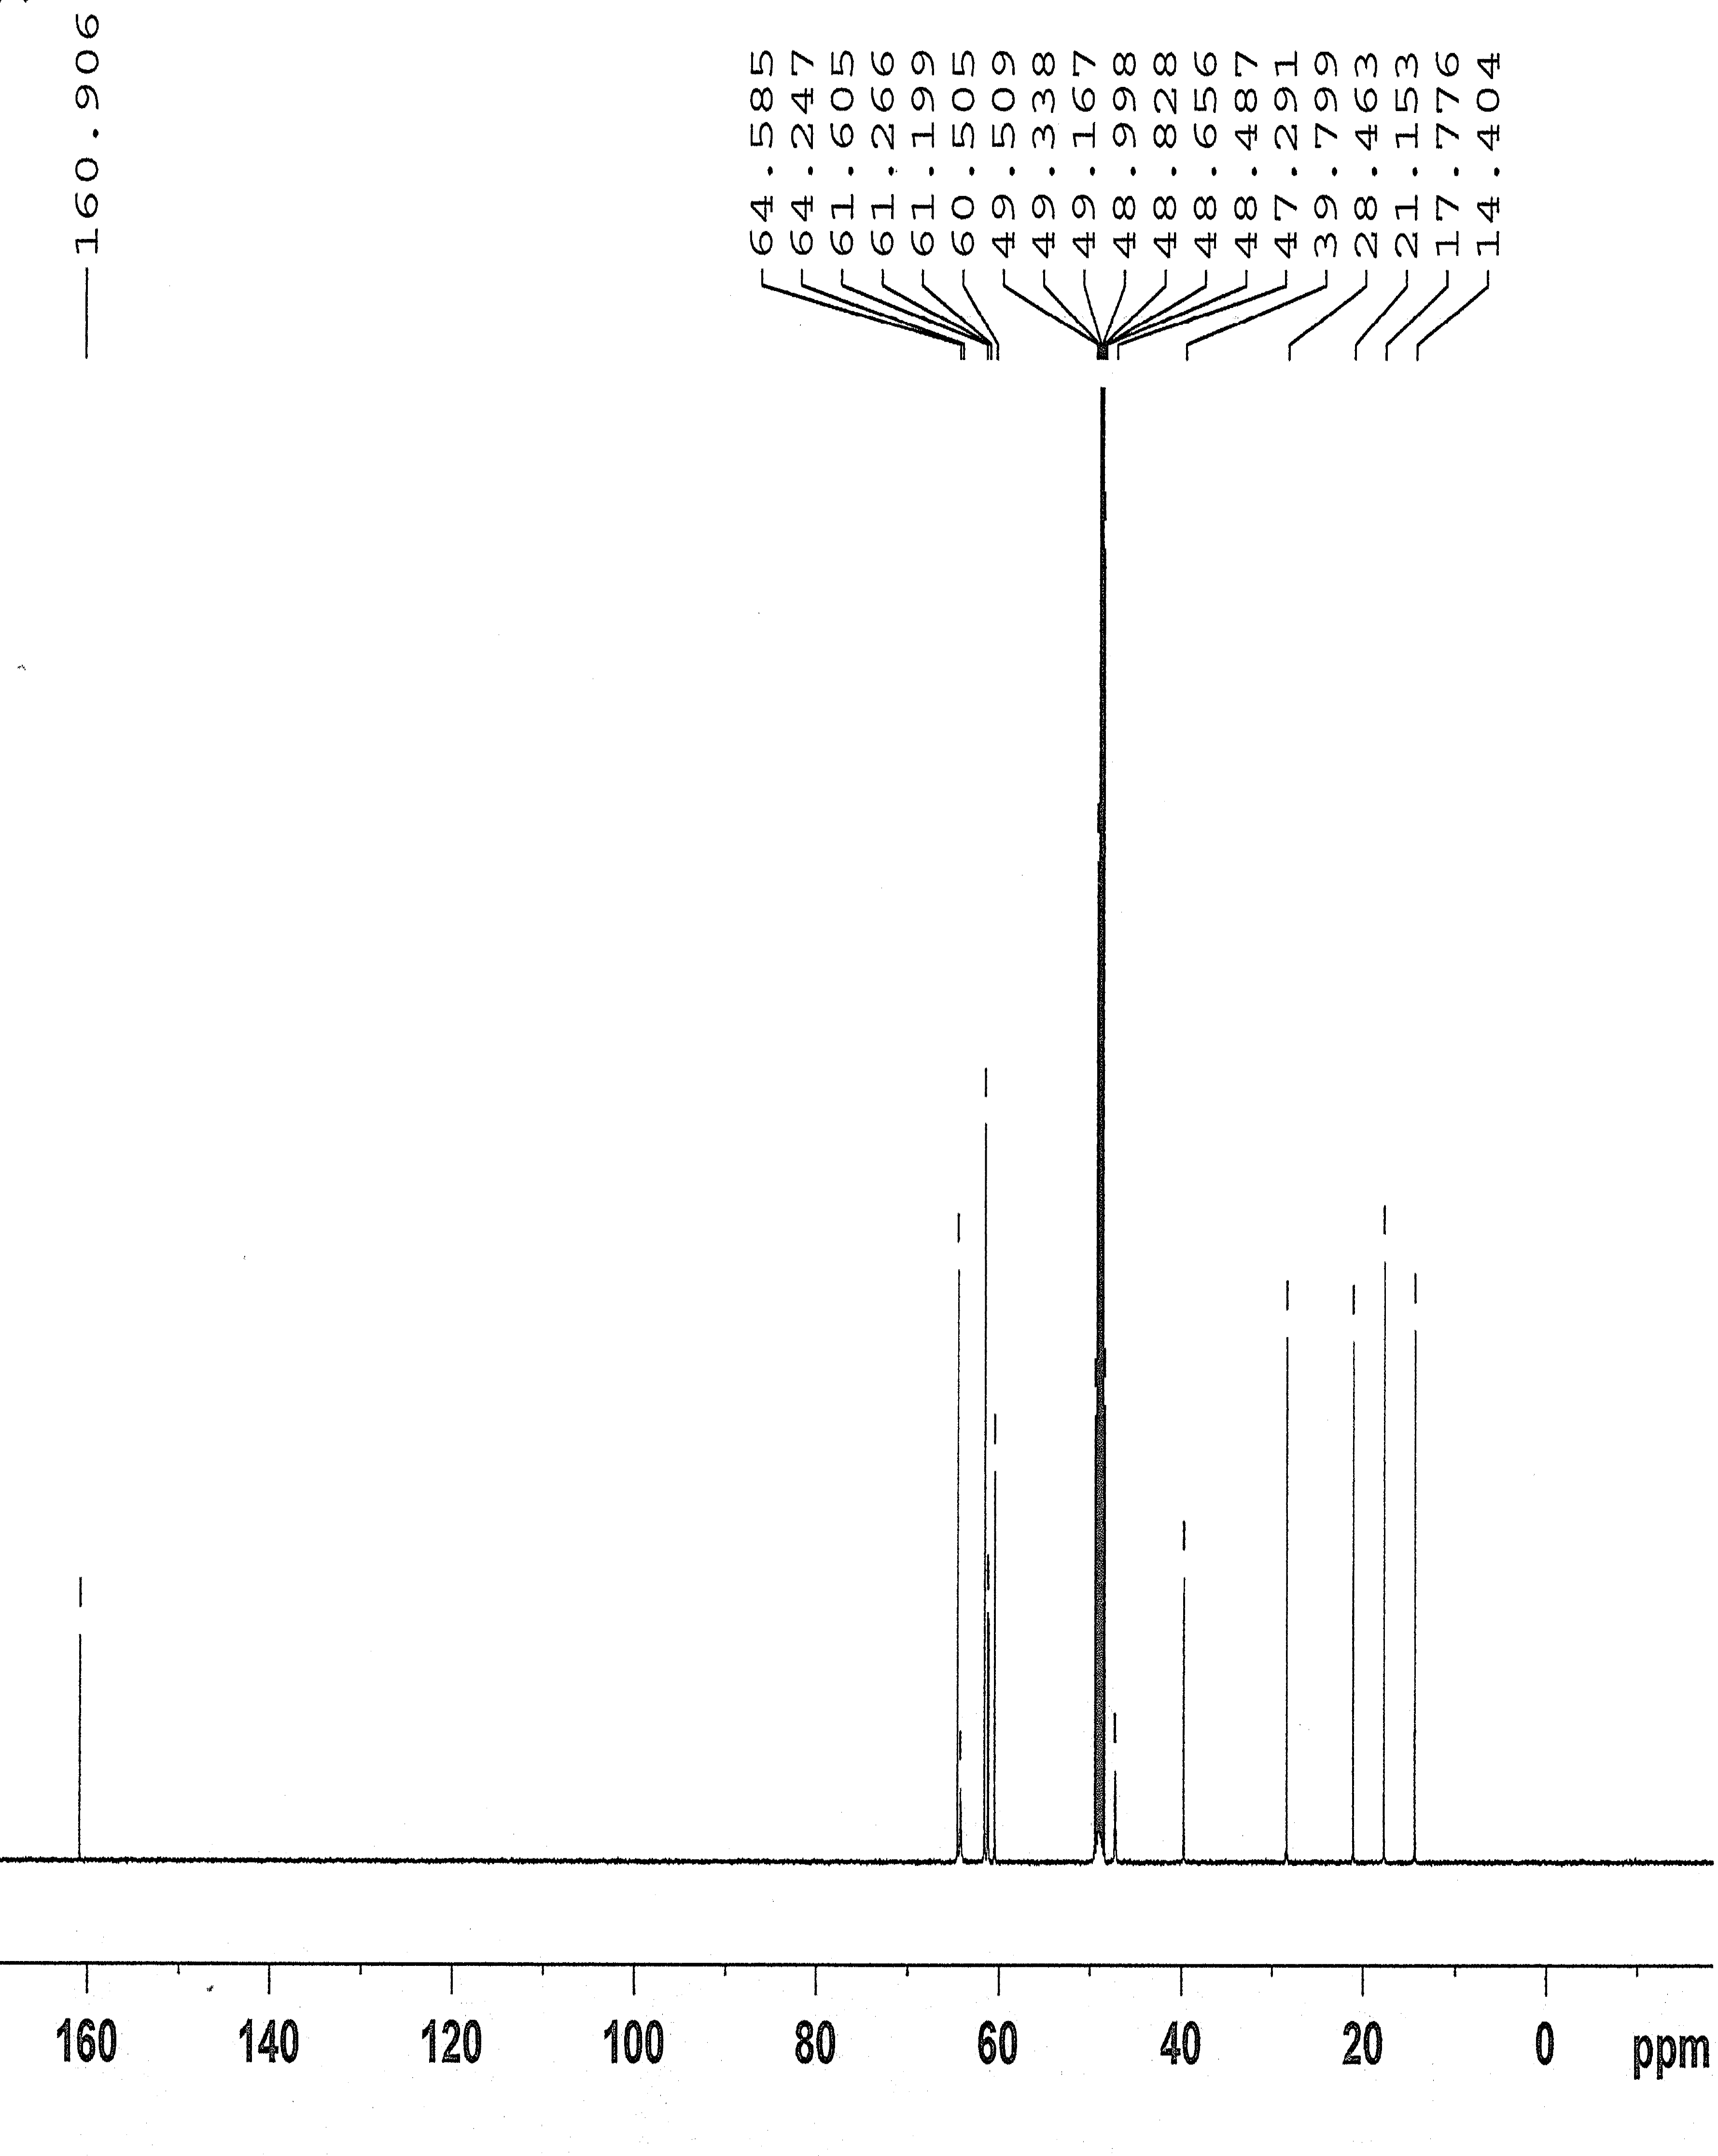


13C NMR of **2i**

**Spectral data of compound (2j):**


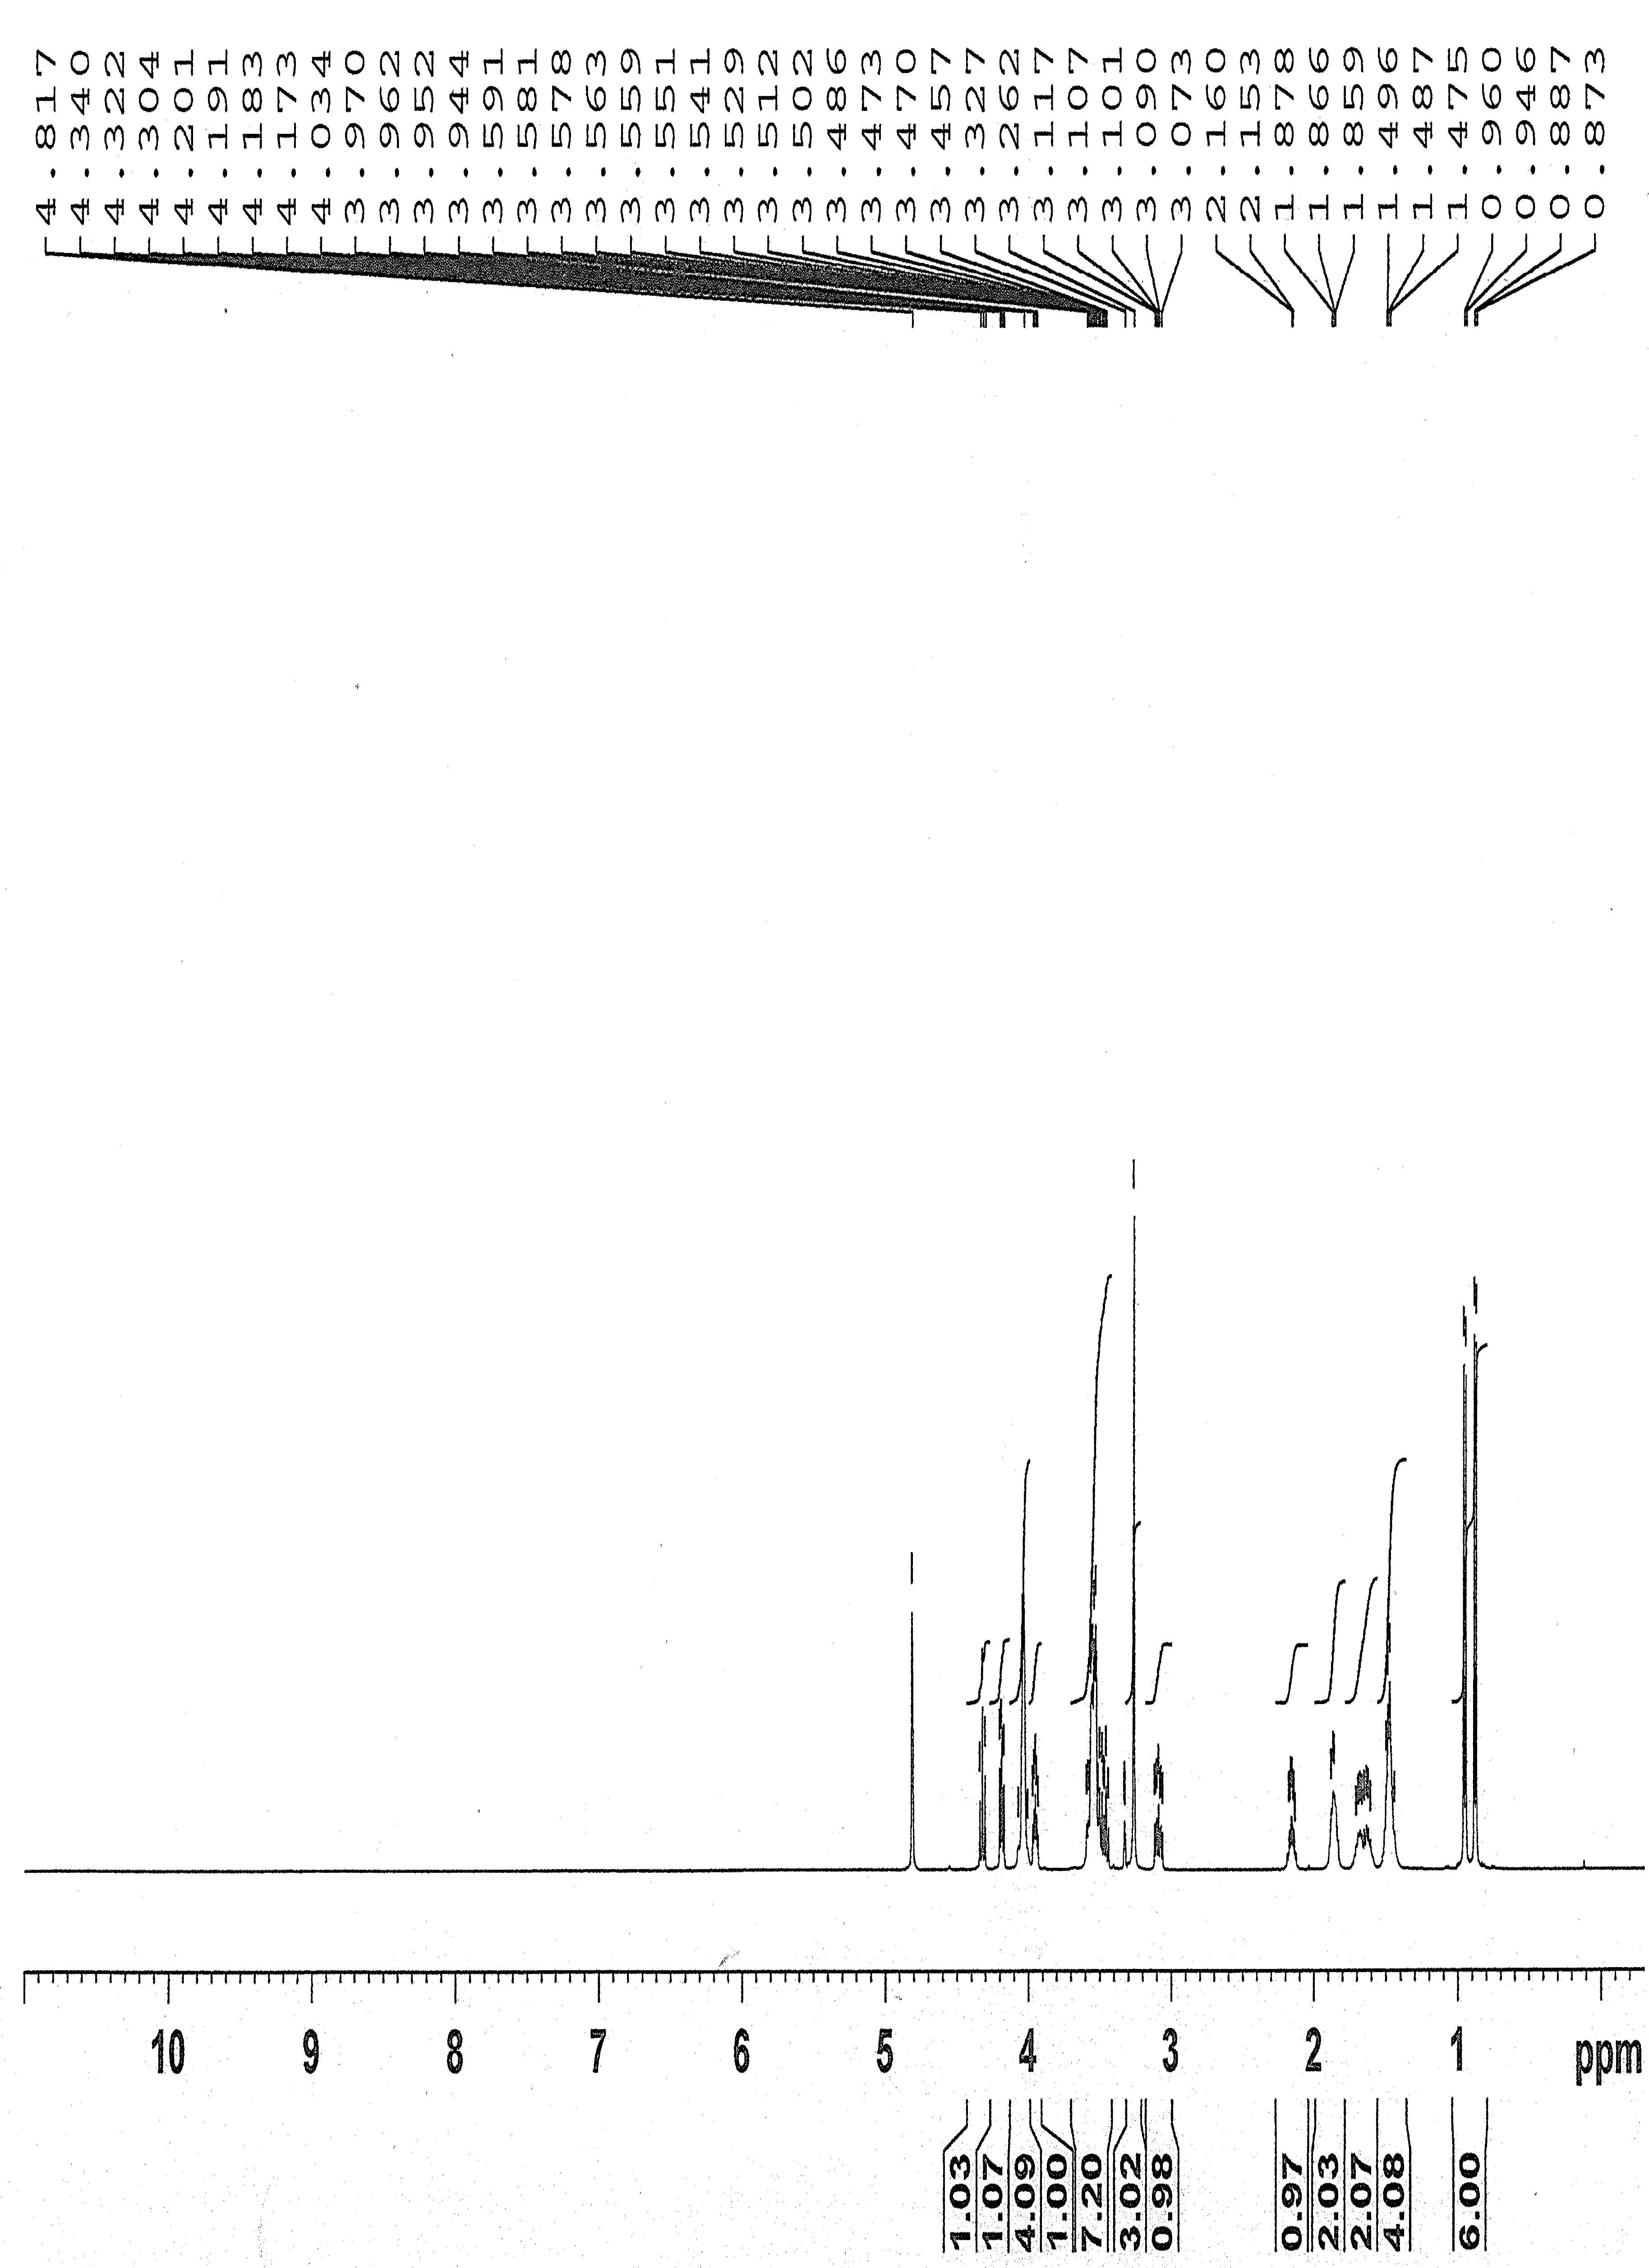


1H NMR of **2j**


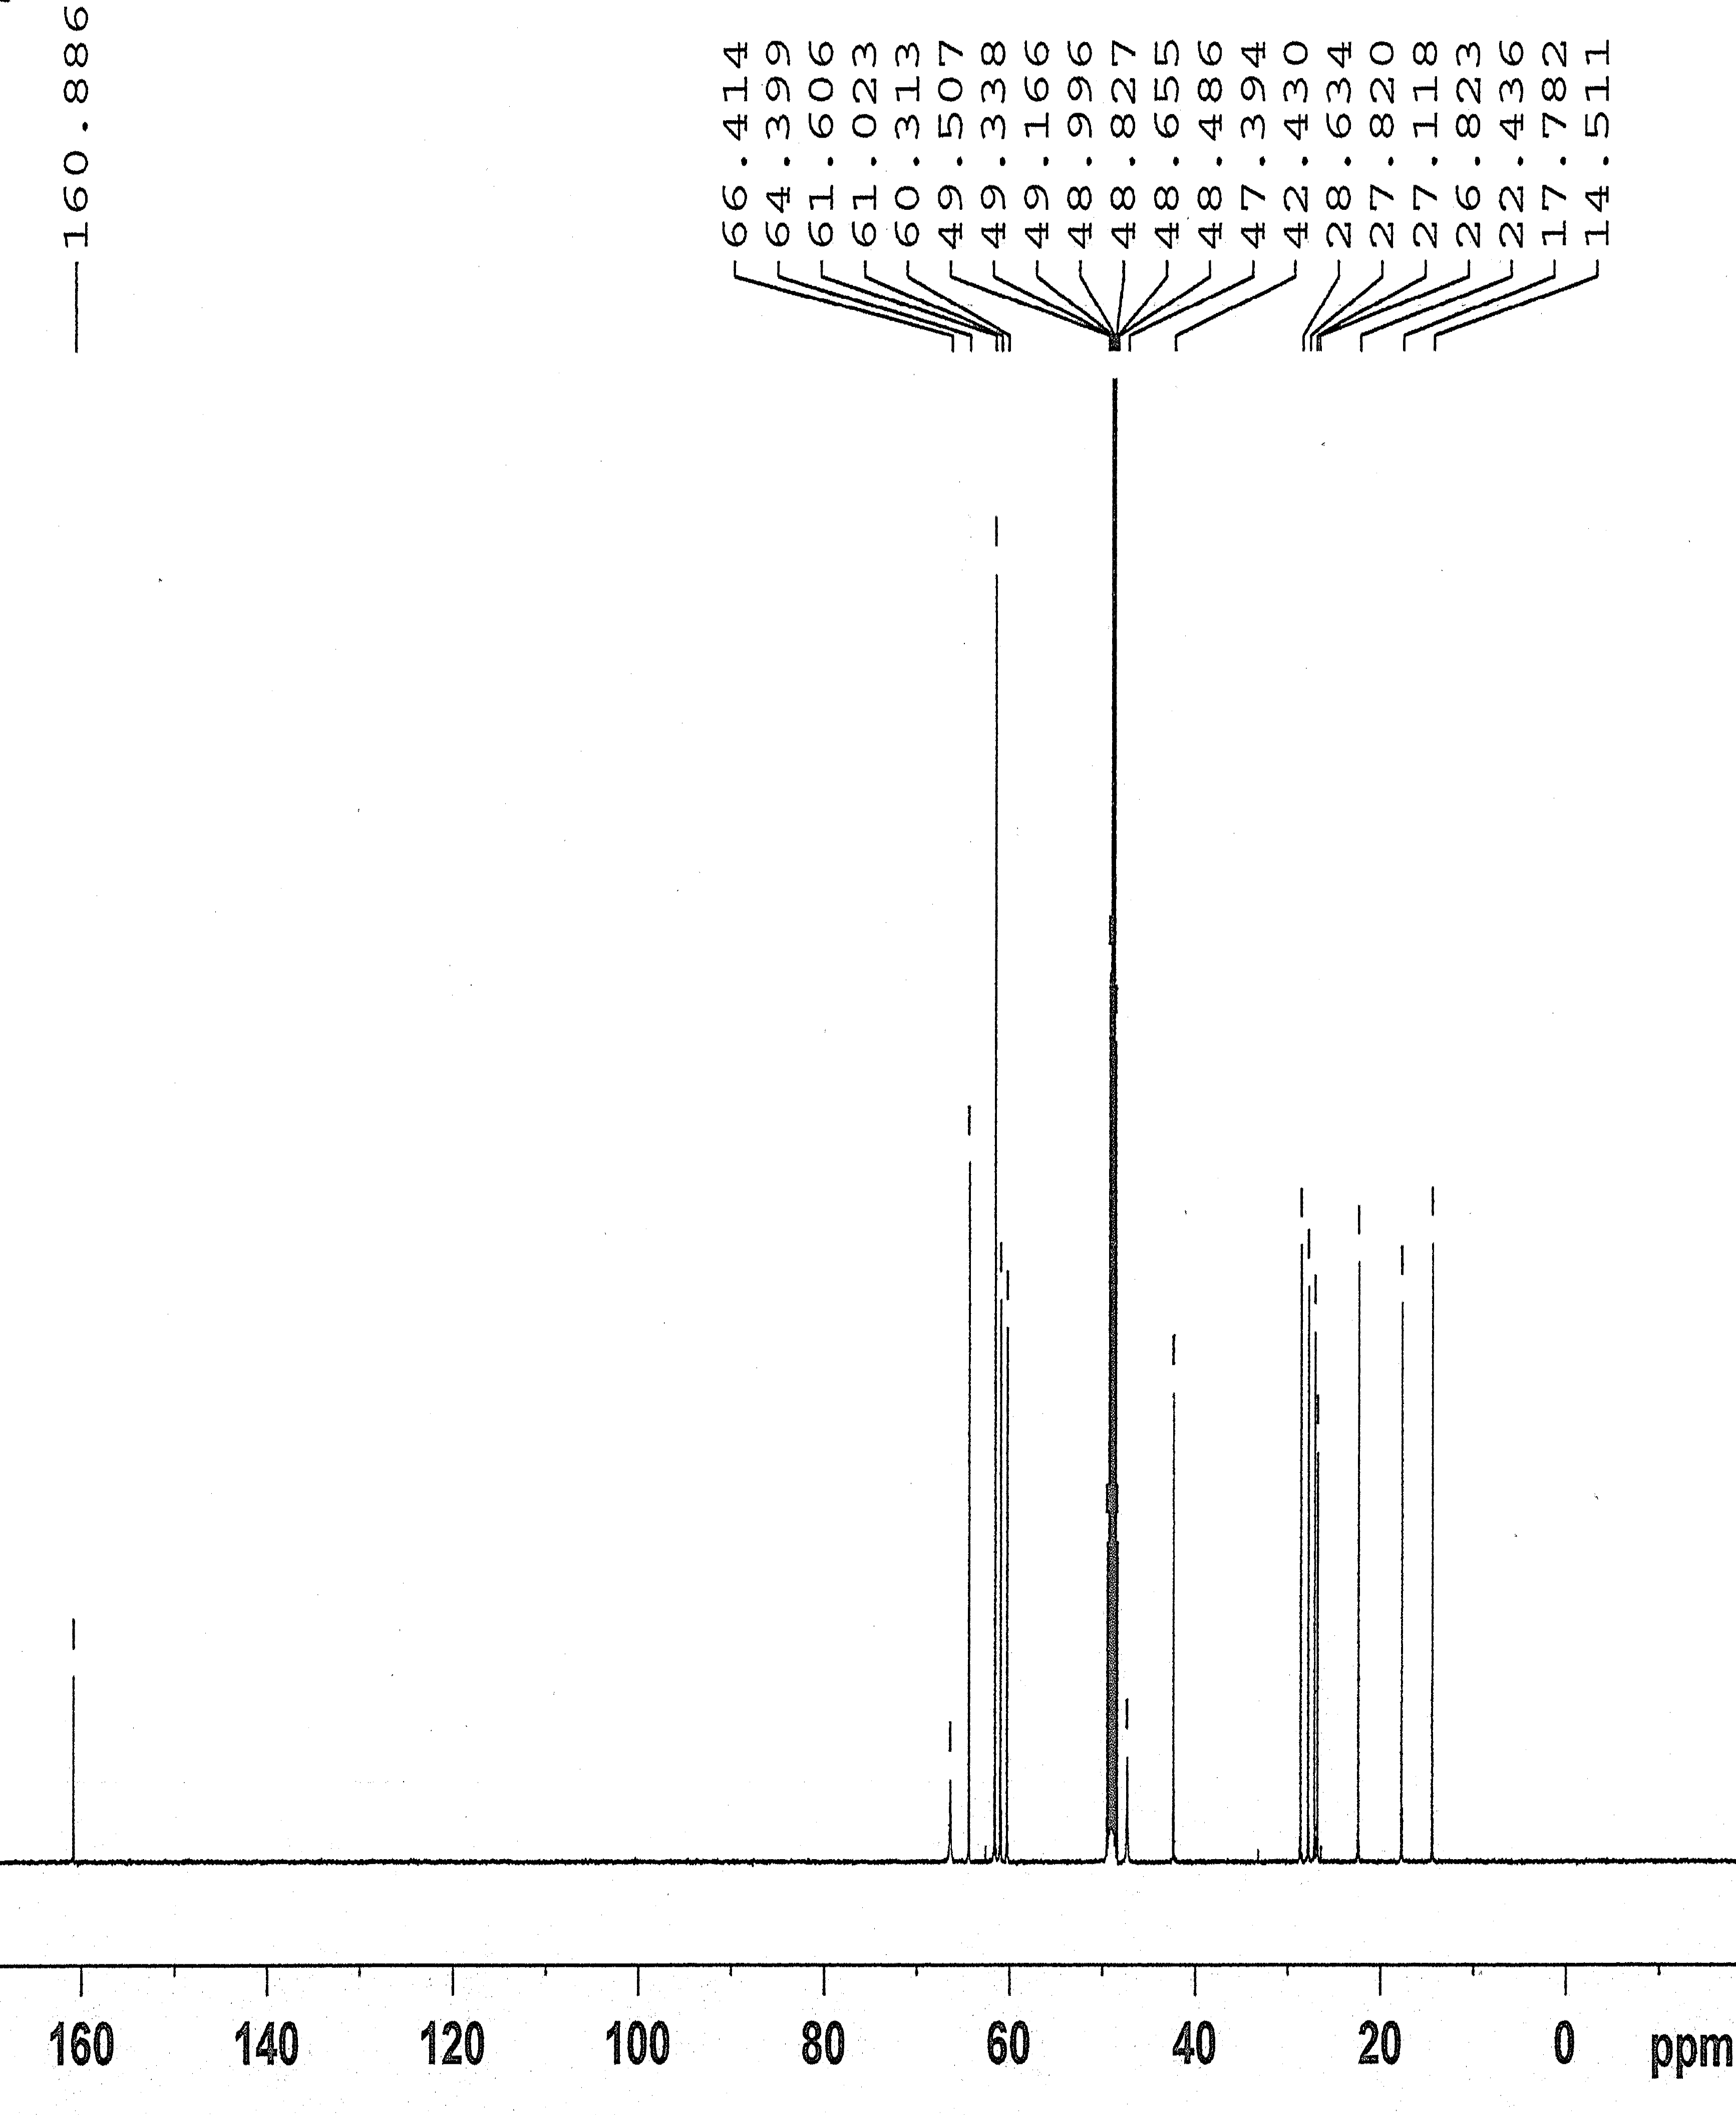


13C NMR of **2j**

**Spectral data of compound (2k):**


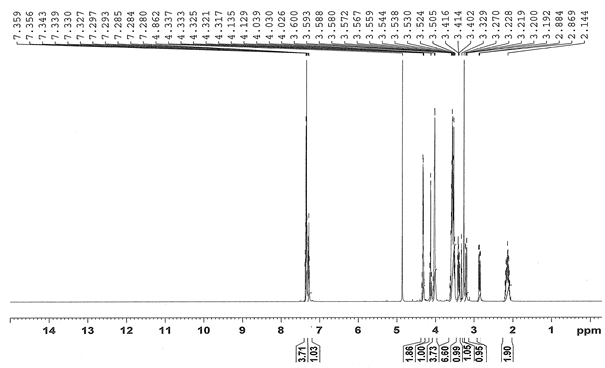


1H NMR of **2k**


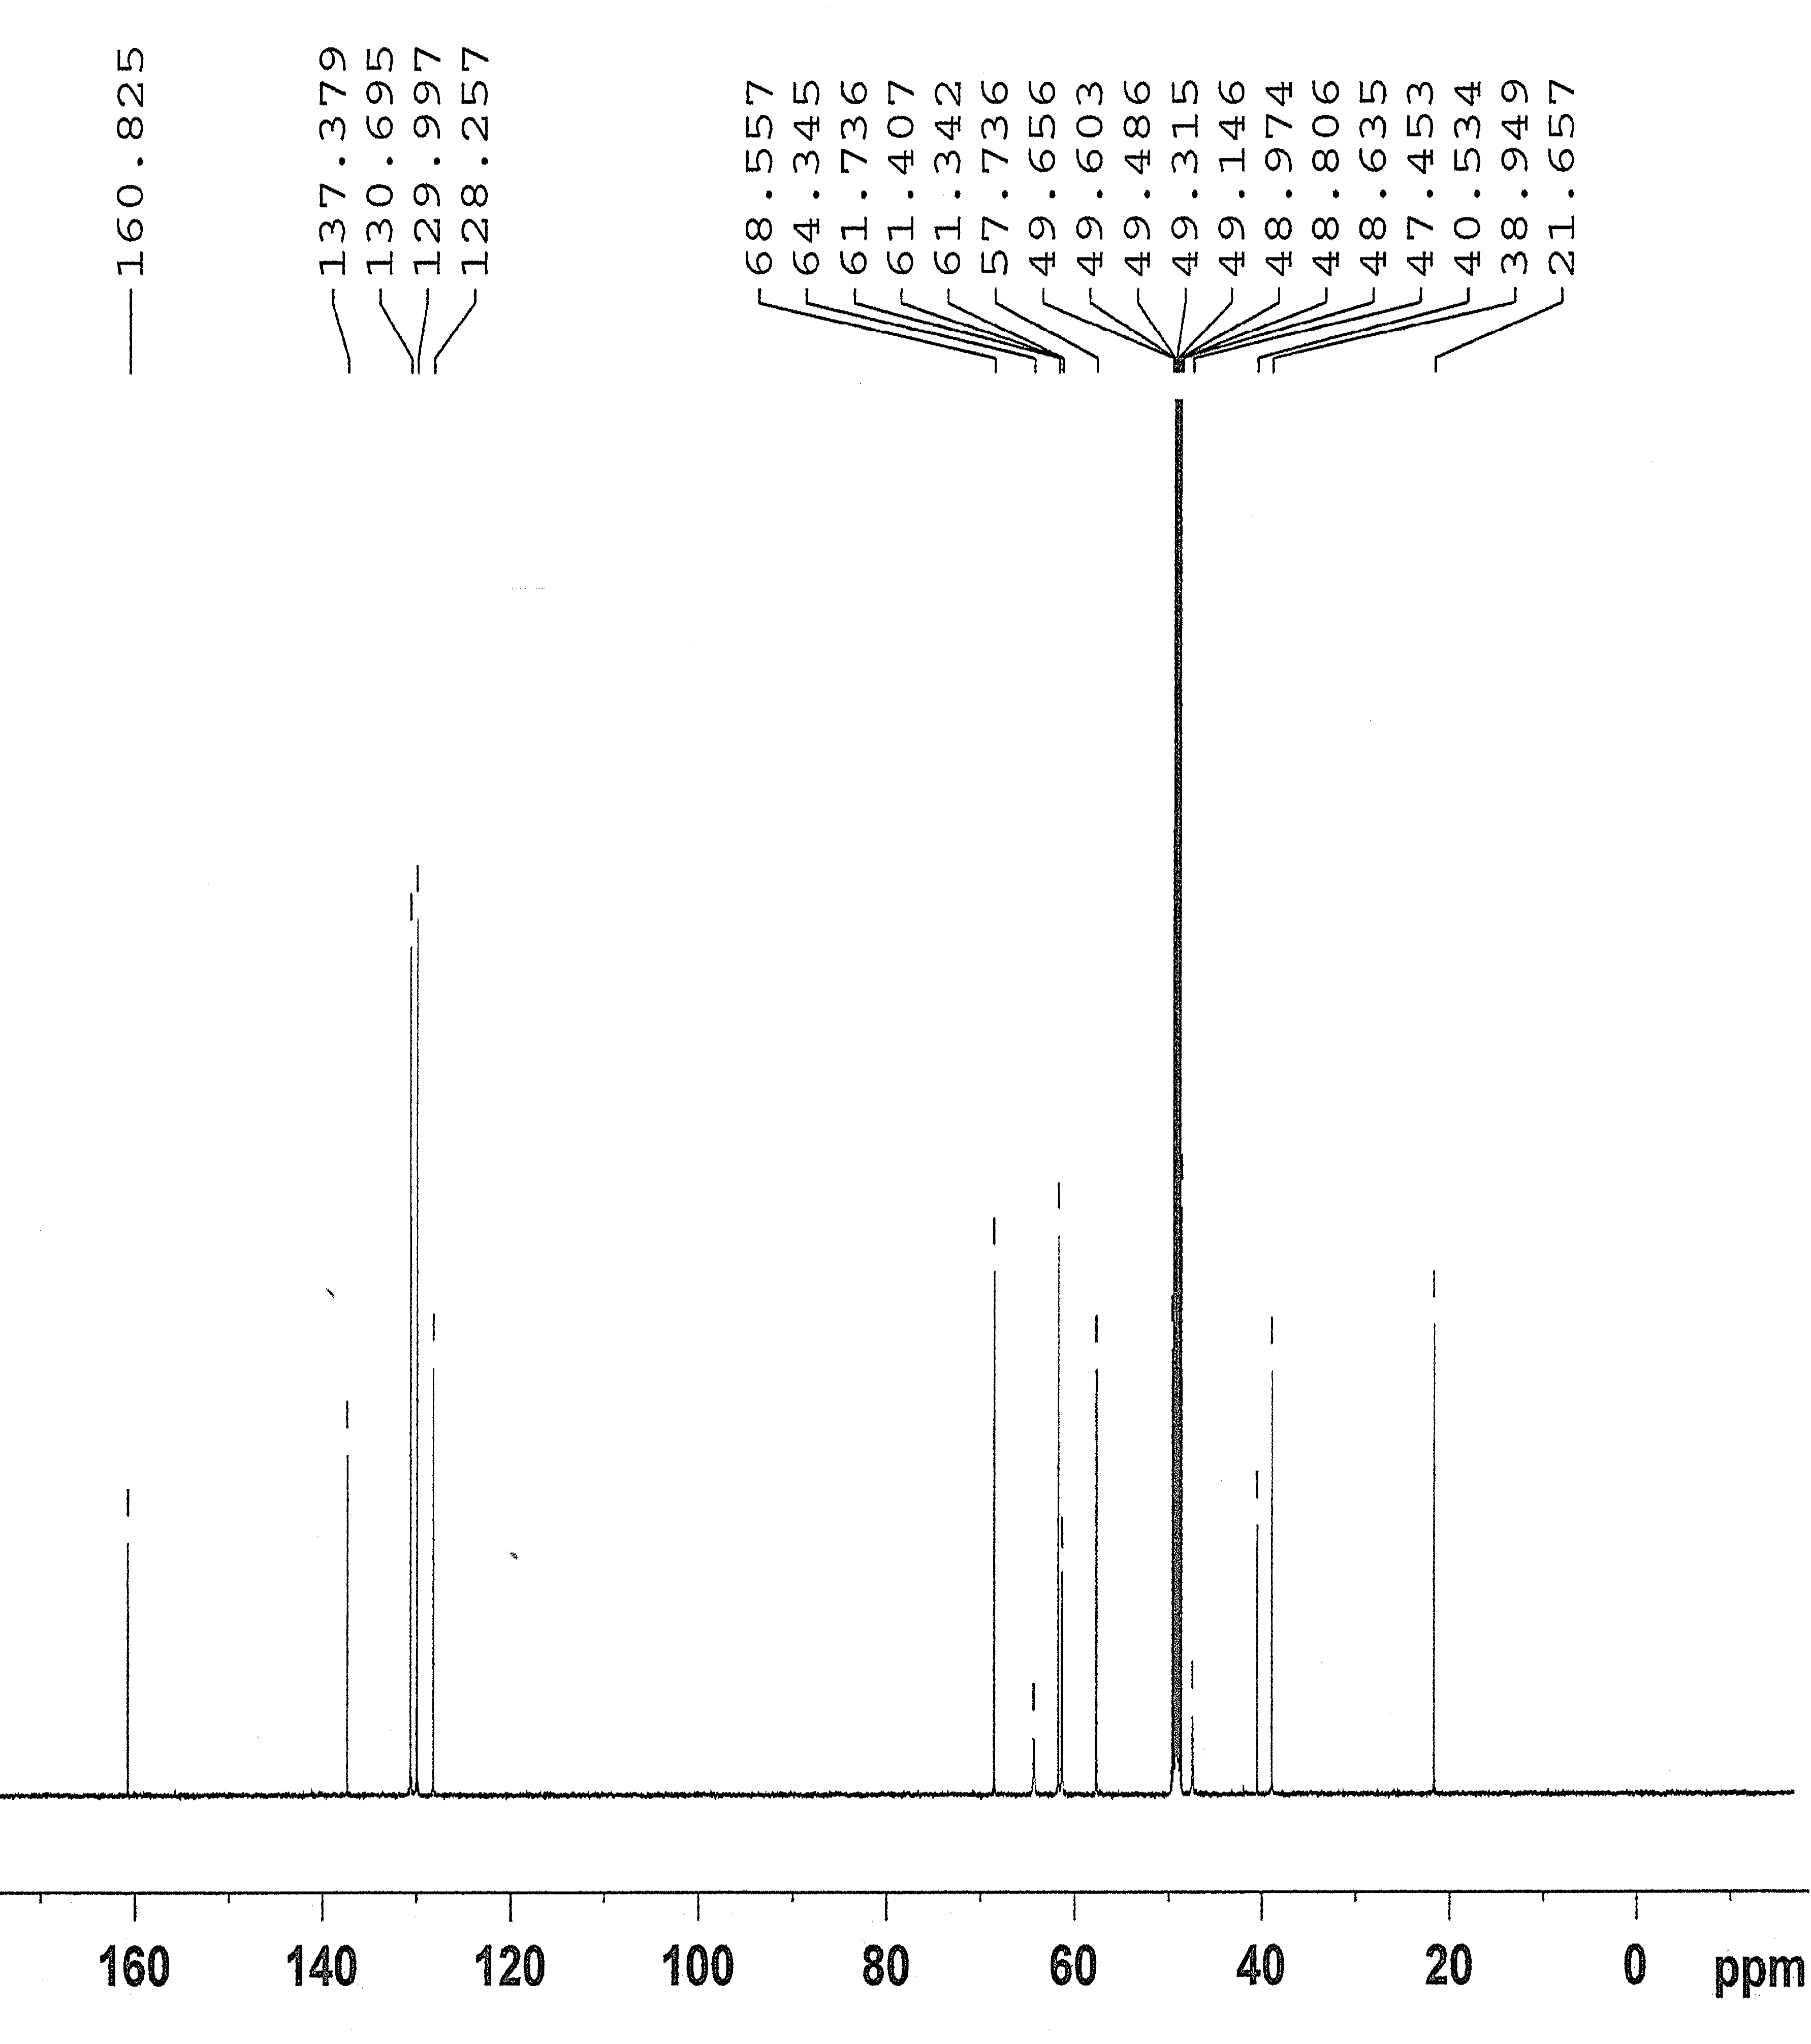


13C NMR **2k**

**Spectral data of compound (2l):**


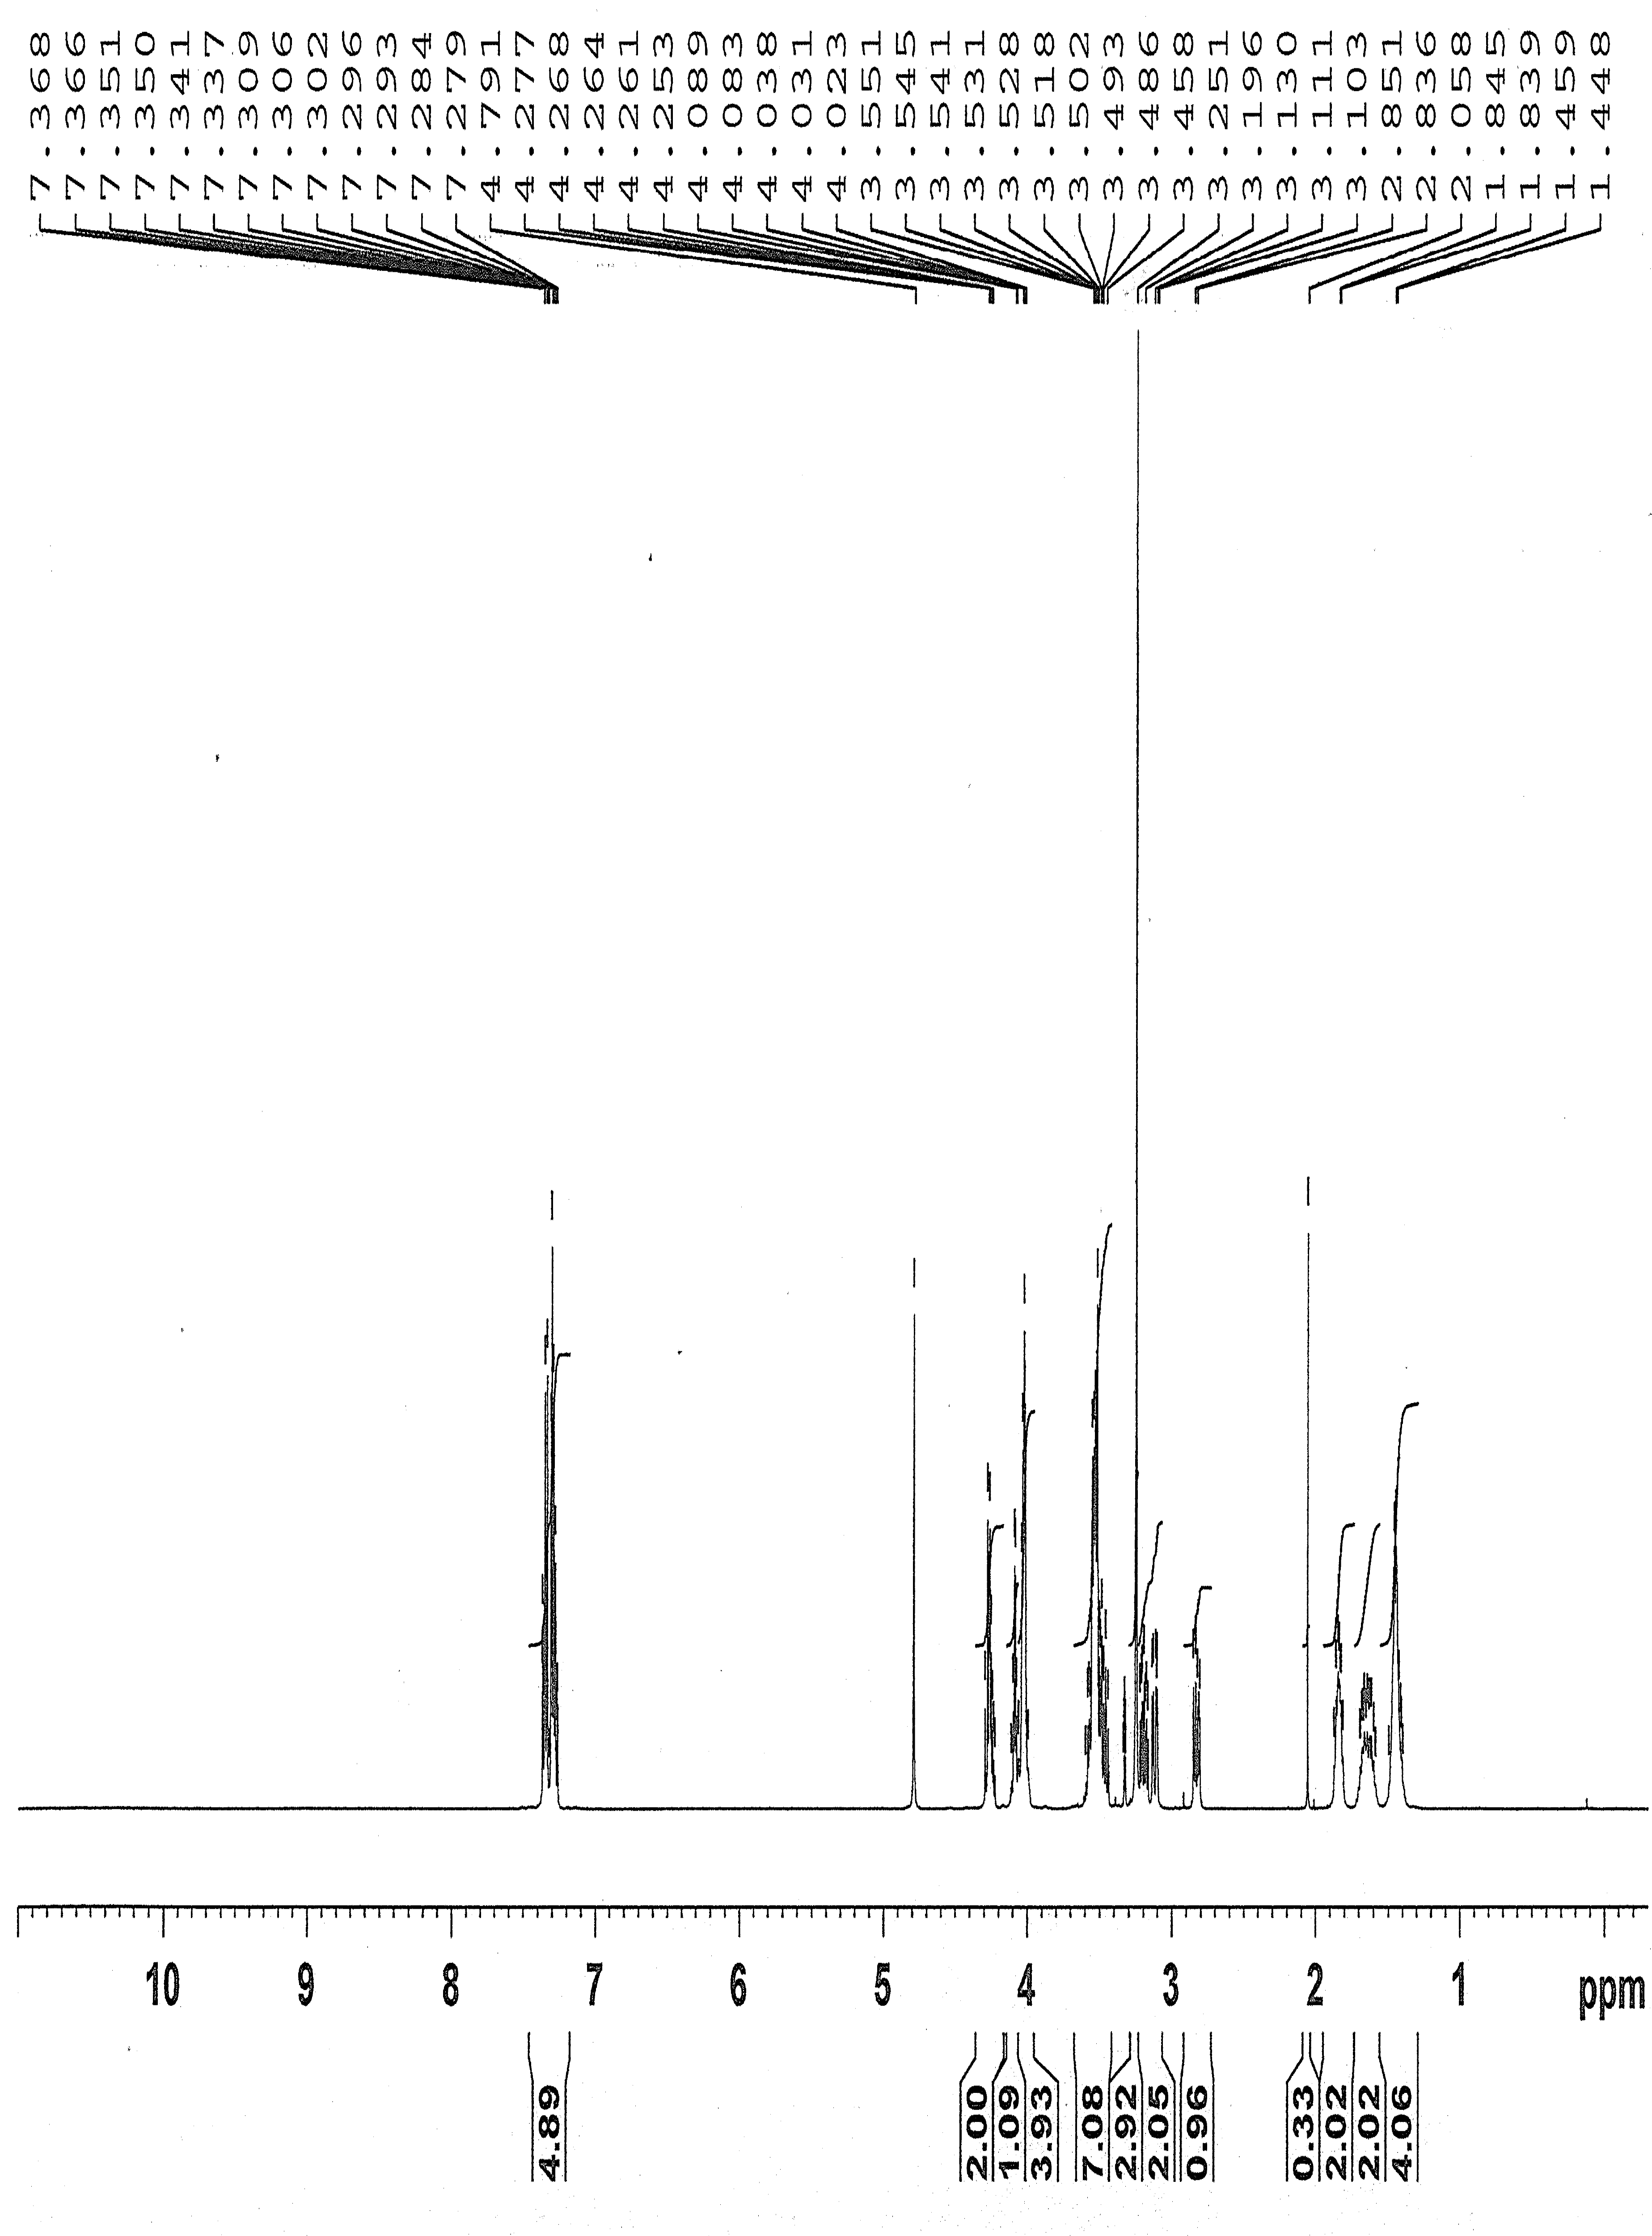


1H NMR of **2l**


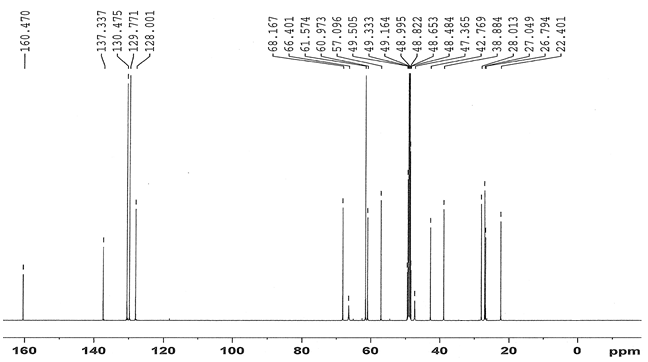


13C NMR of **2l**

**Spectral data of compound (2m):**

**
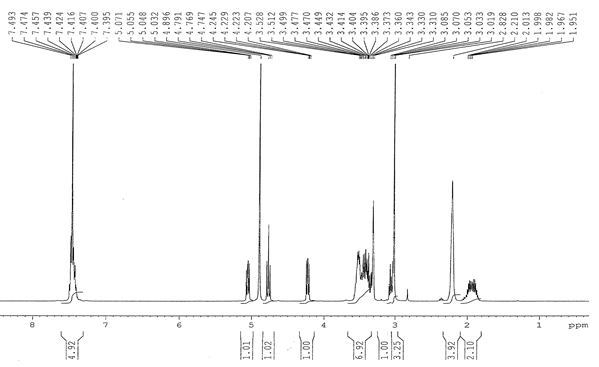
**

1H NMR of **2m**

**
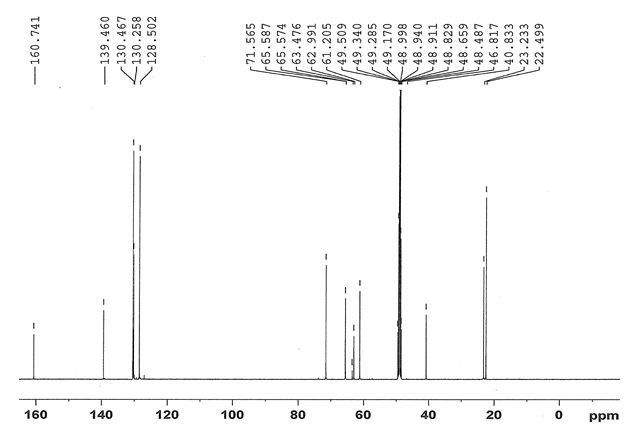
**

13C NMR of **2m**

**Spectral data of compound (2n):**


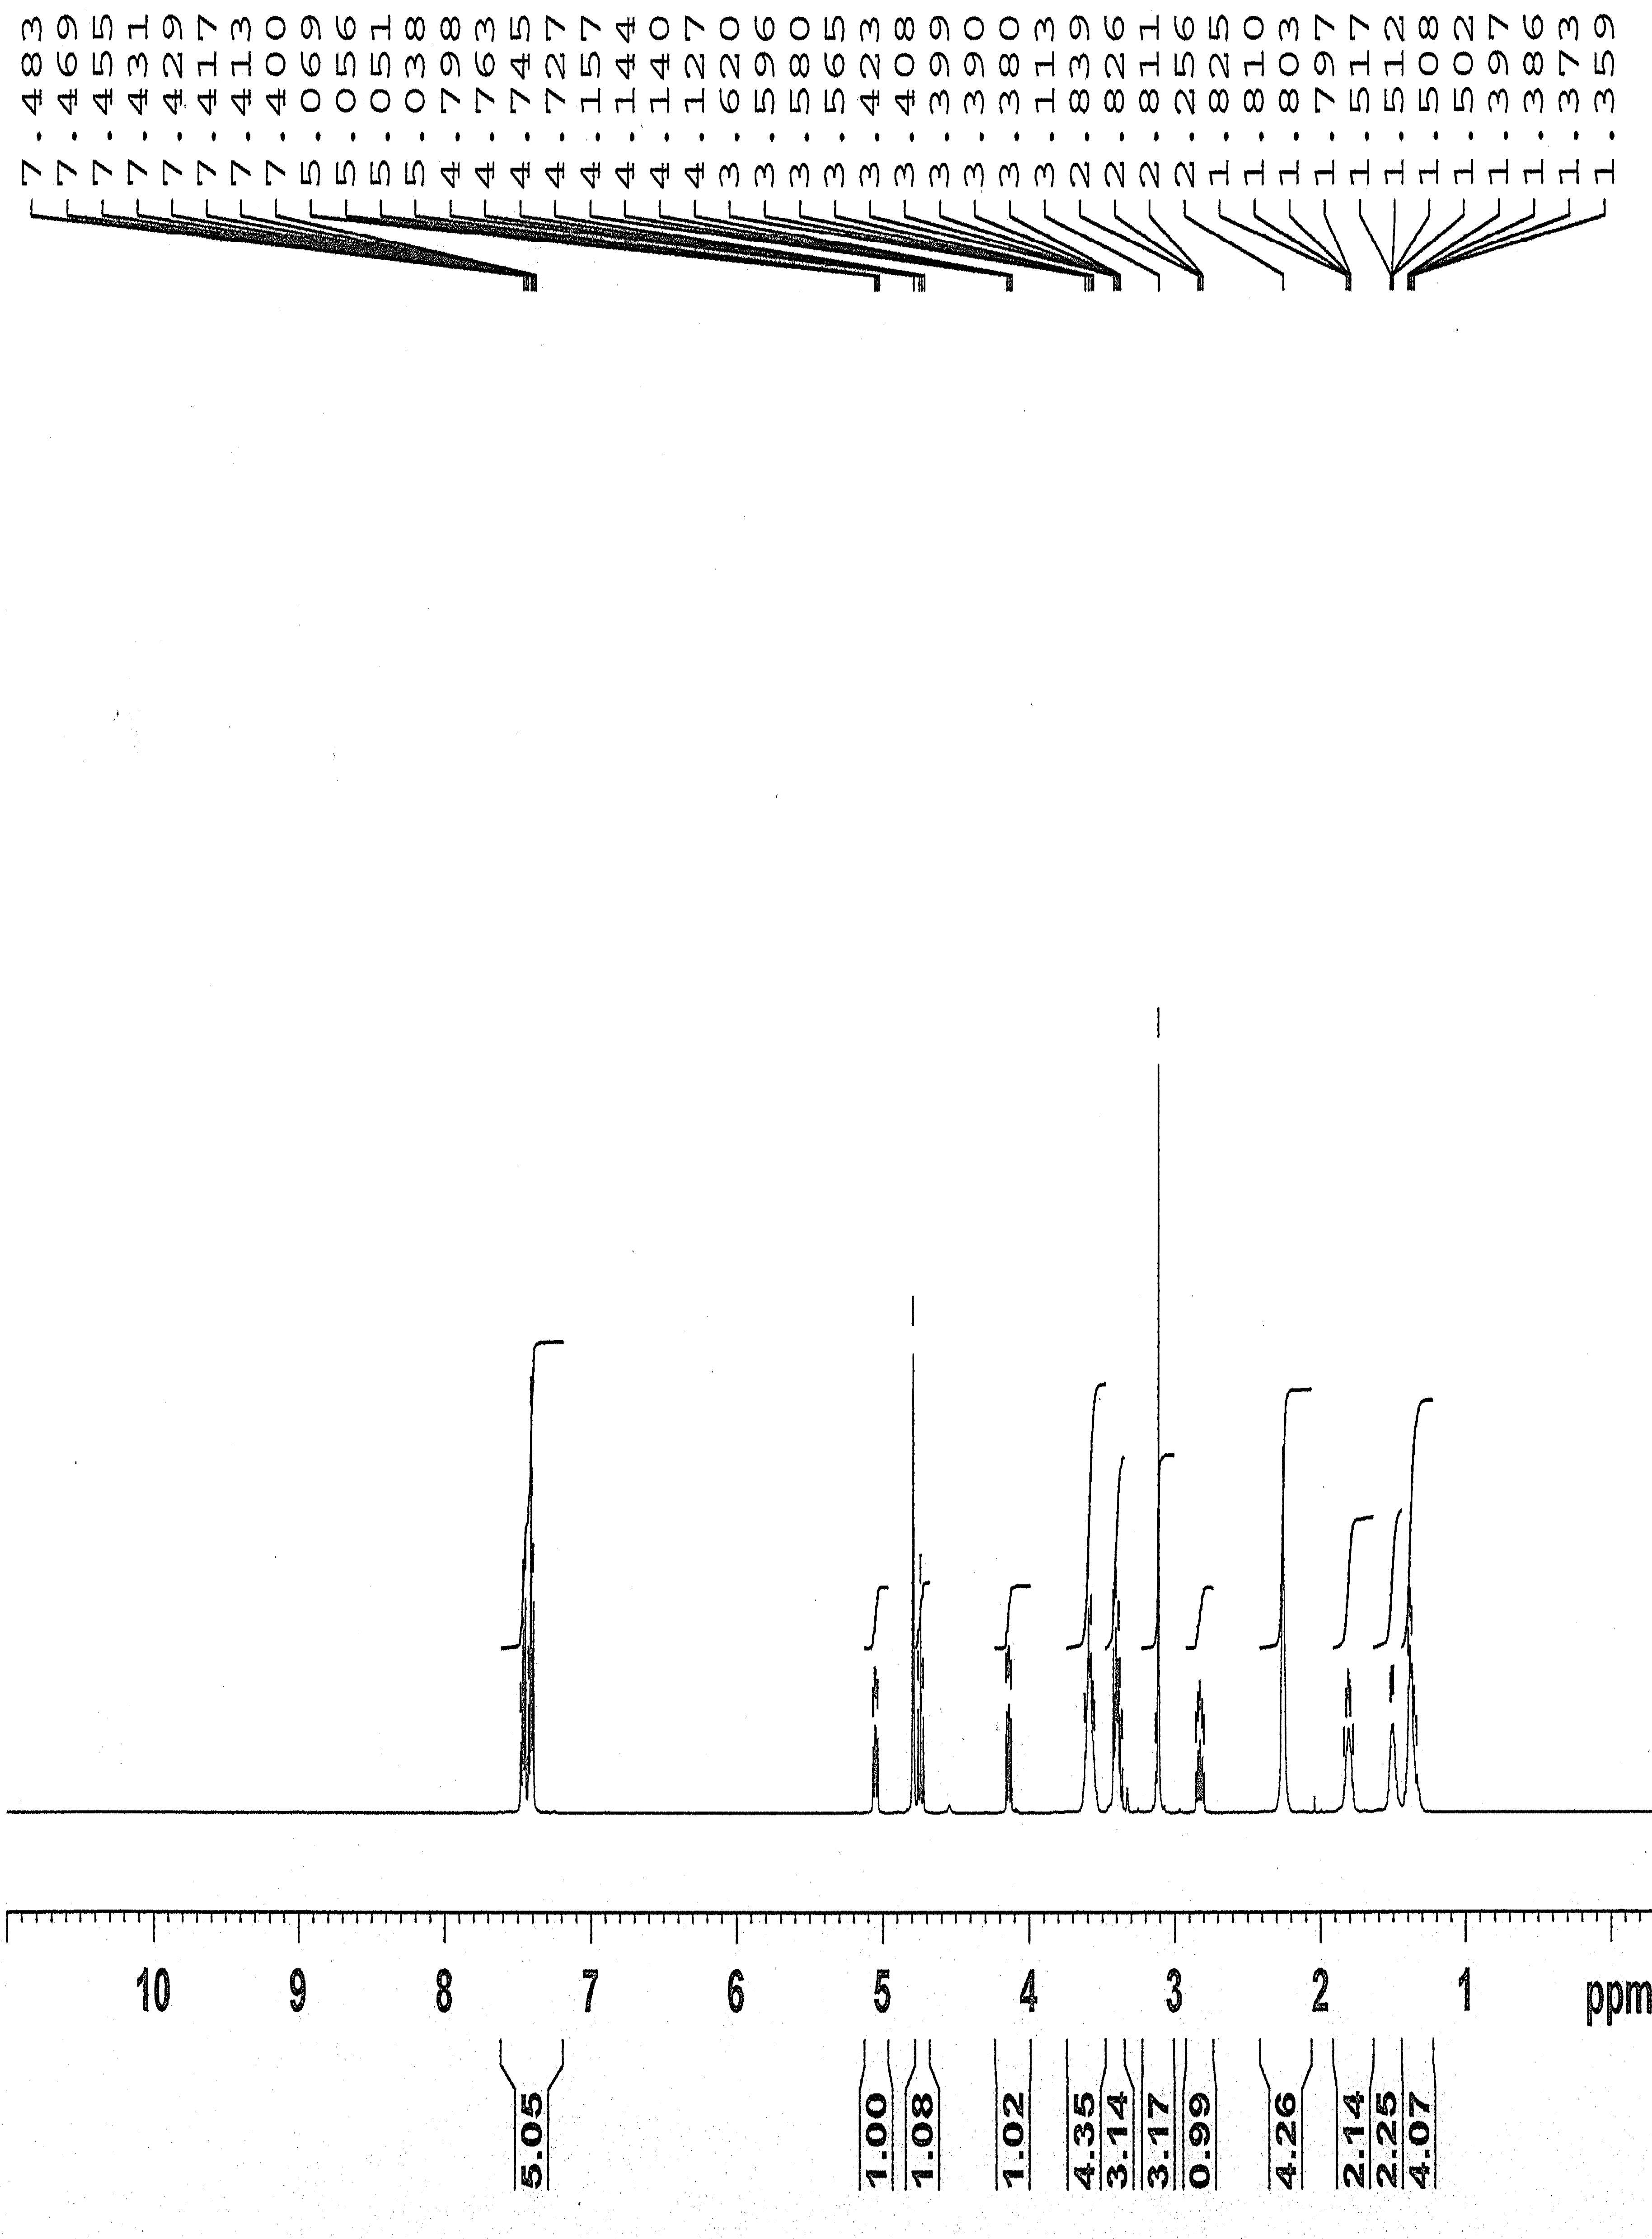


1H NMR of **2n**
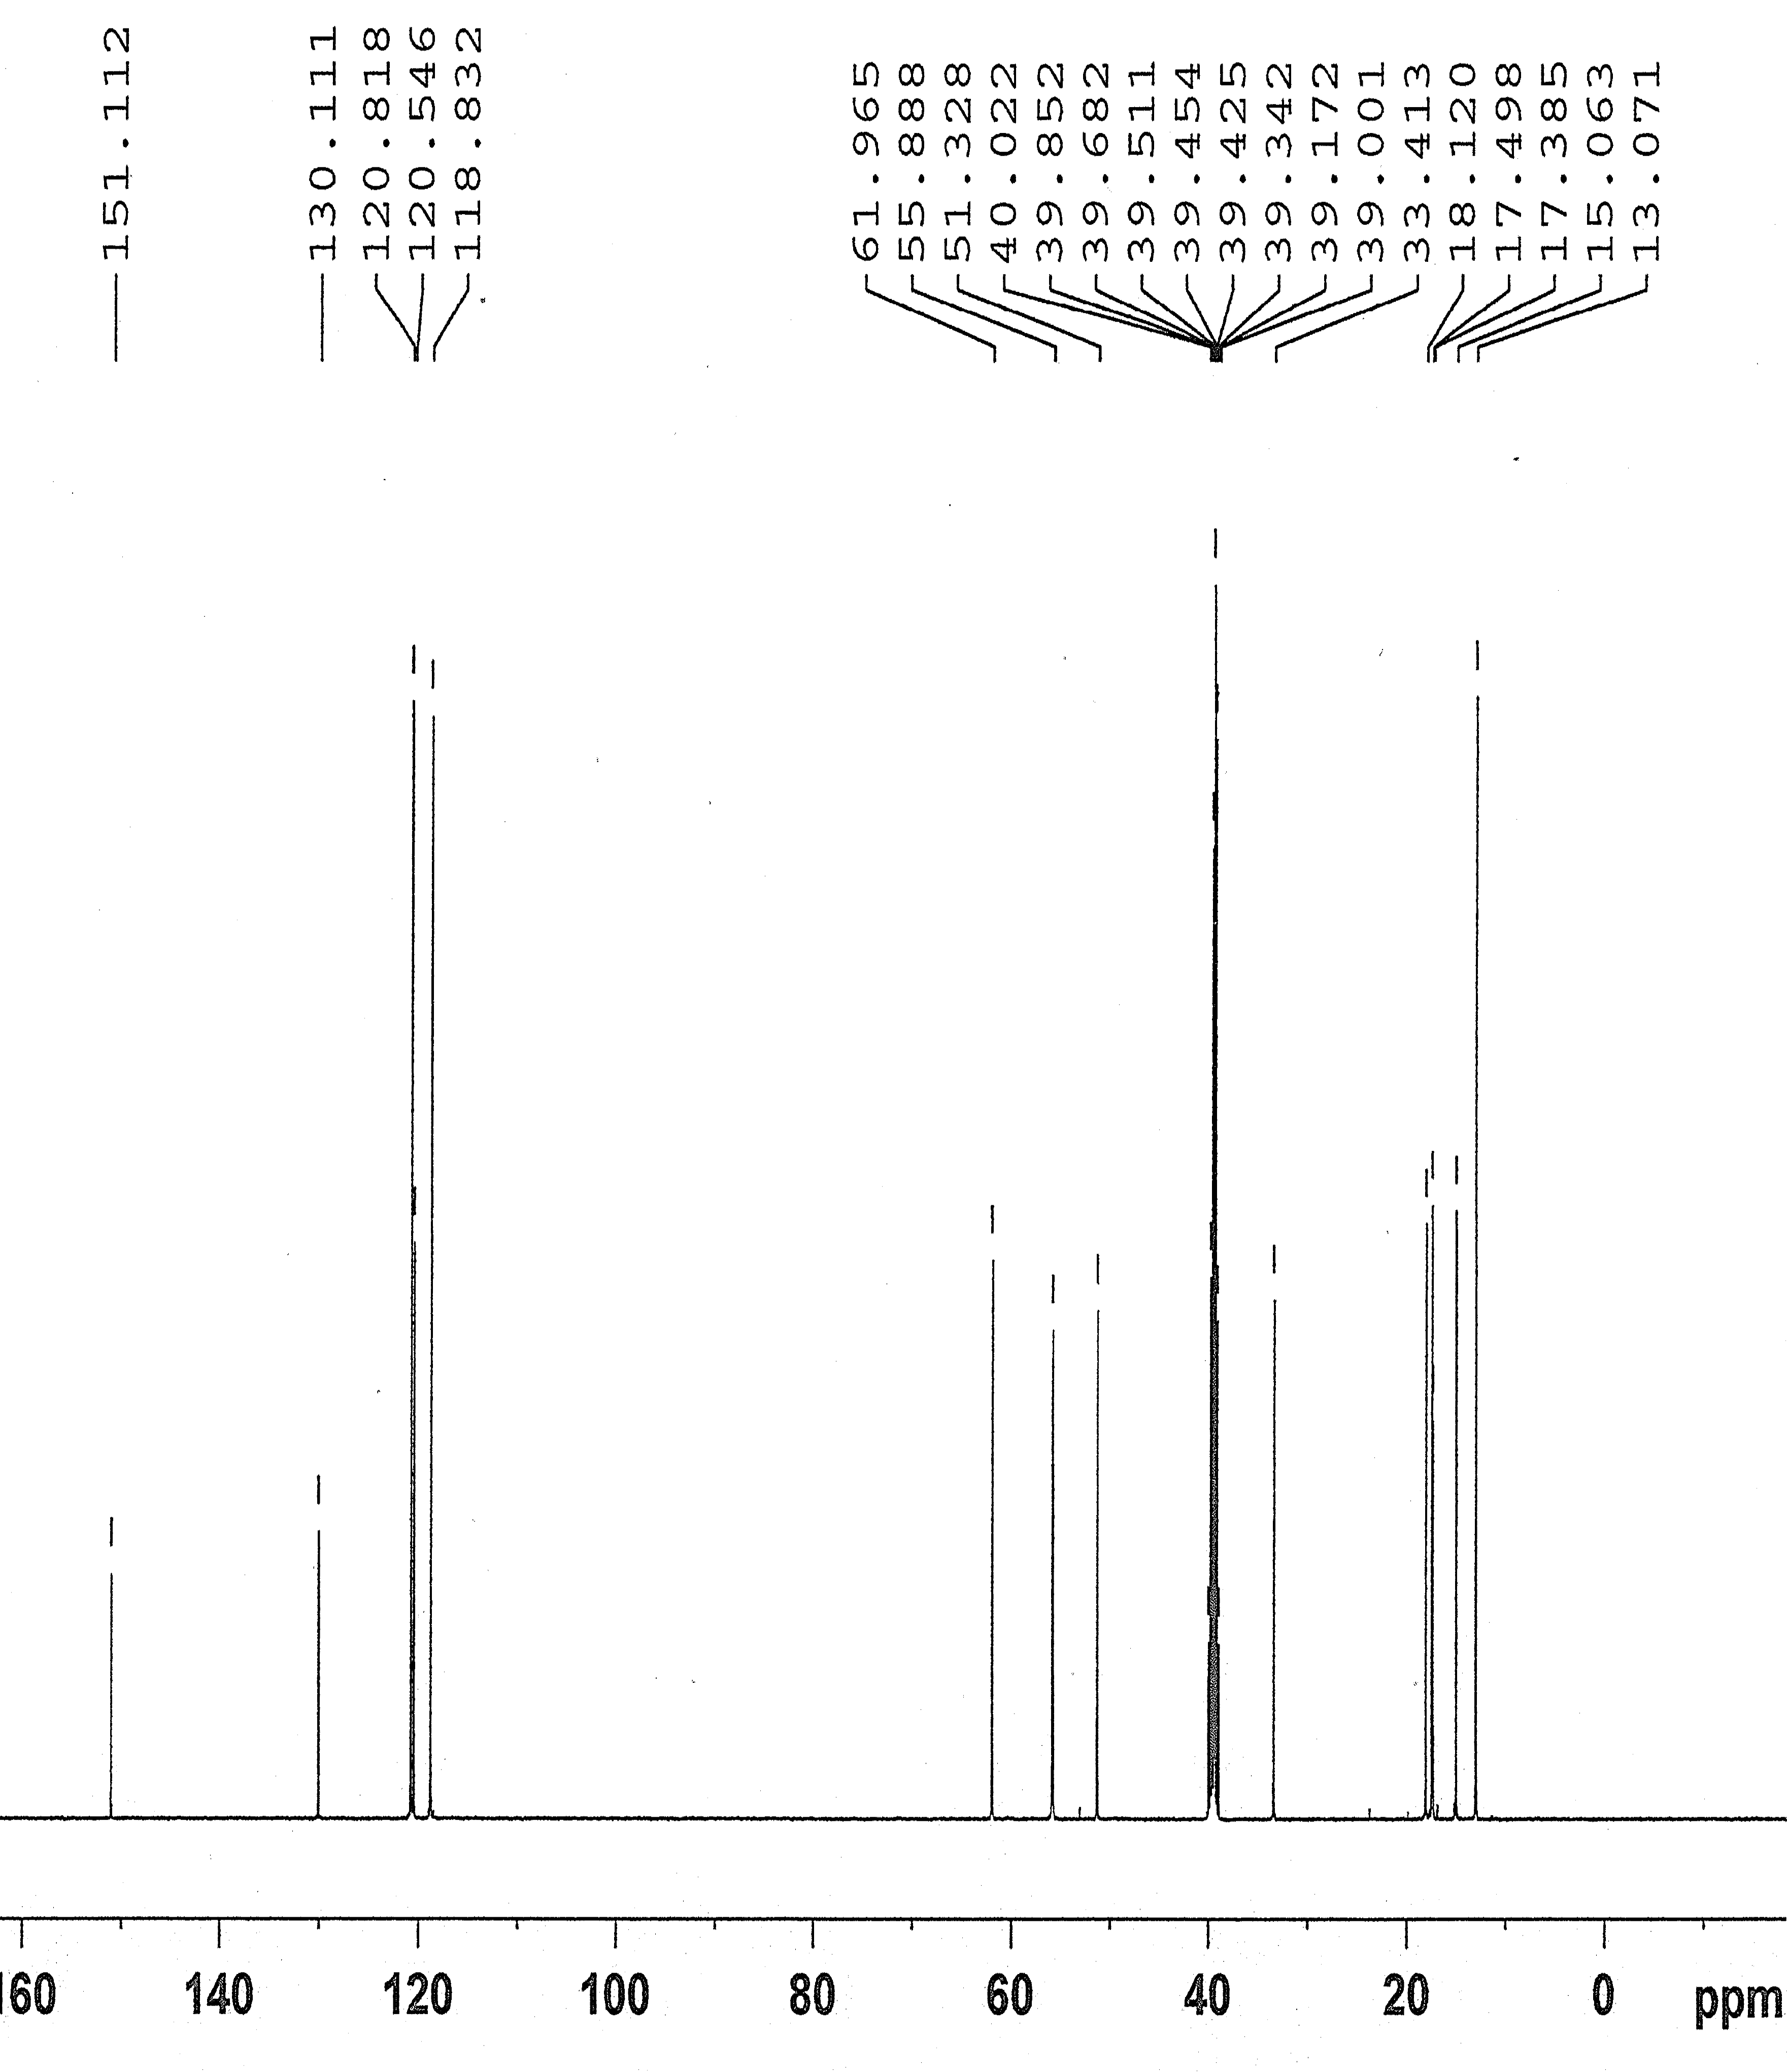


13C NMR of **2n**

**Spectral data of compound (2o):**


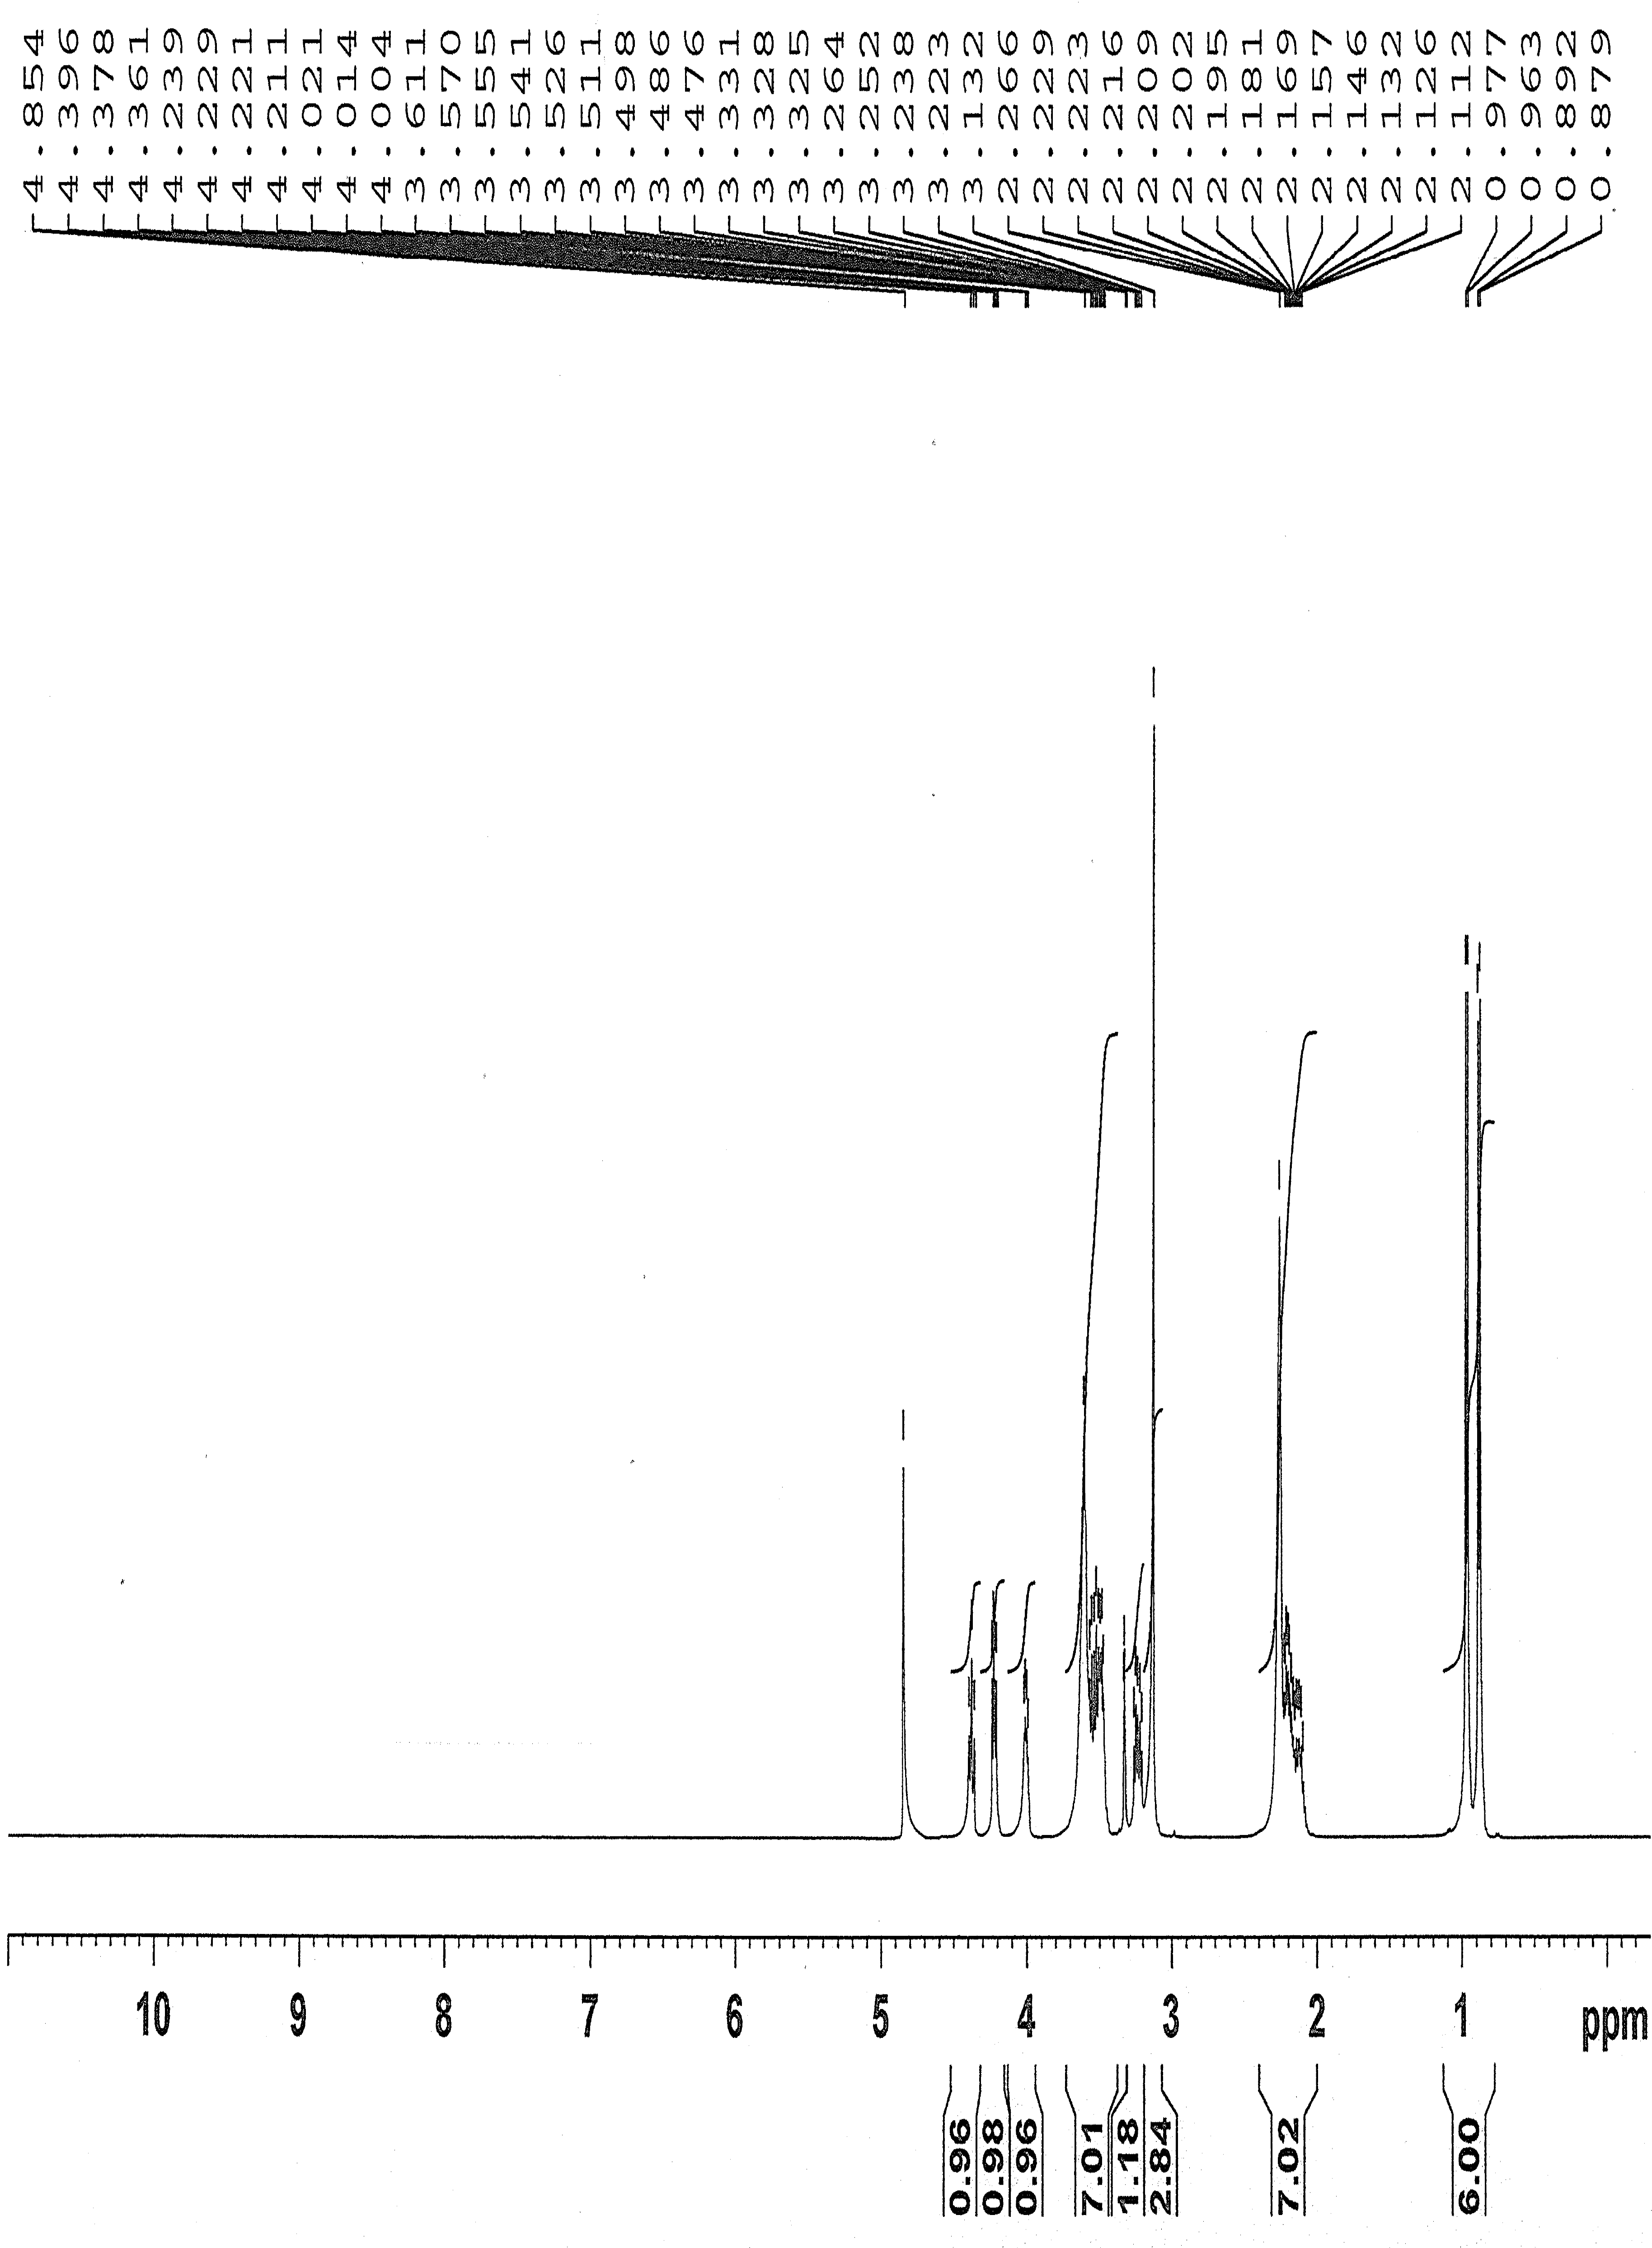


1H NMR of **2o**


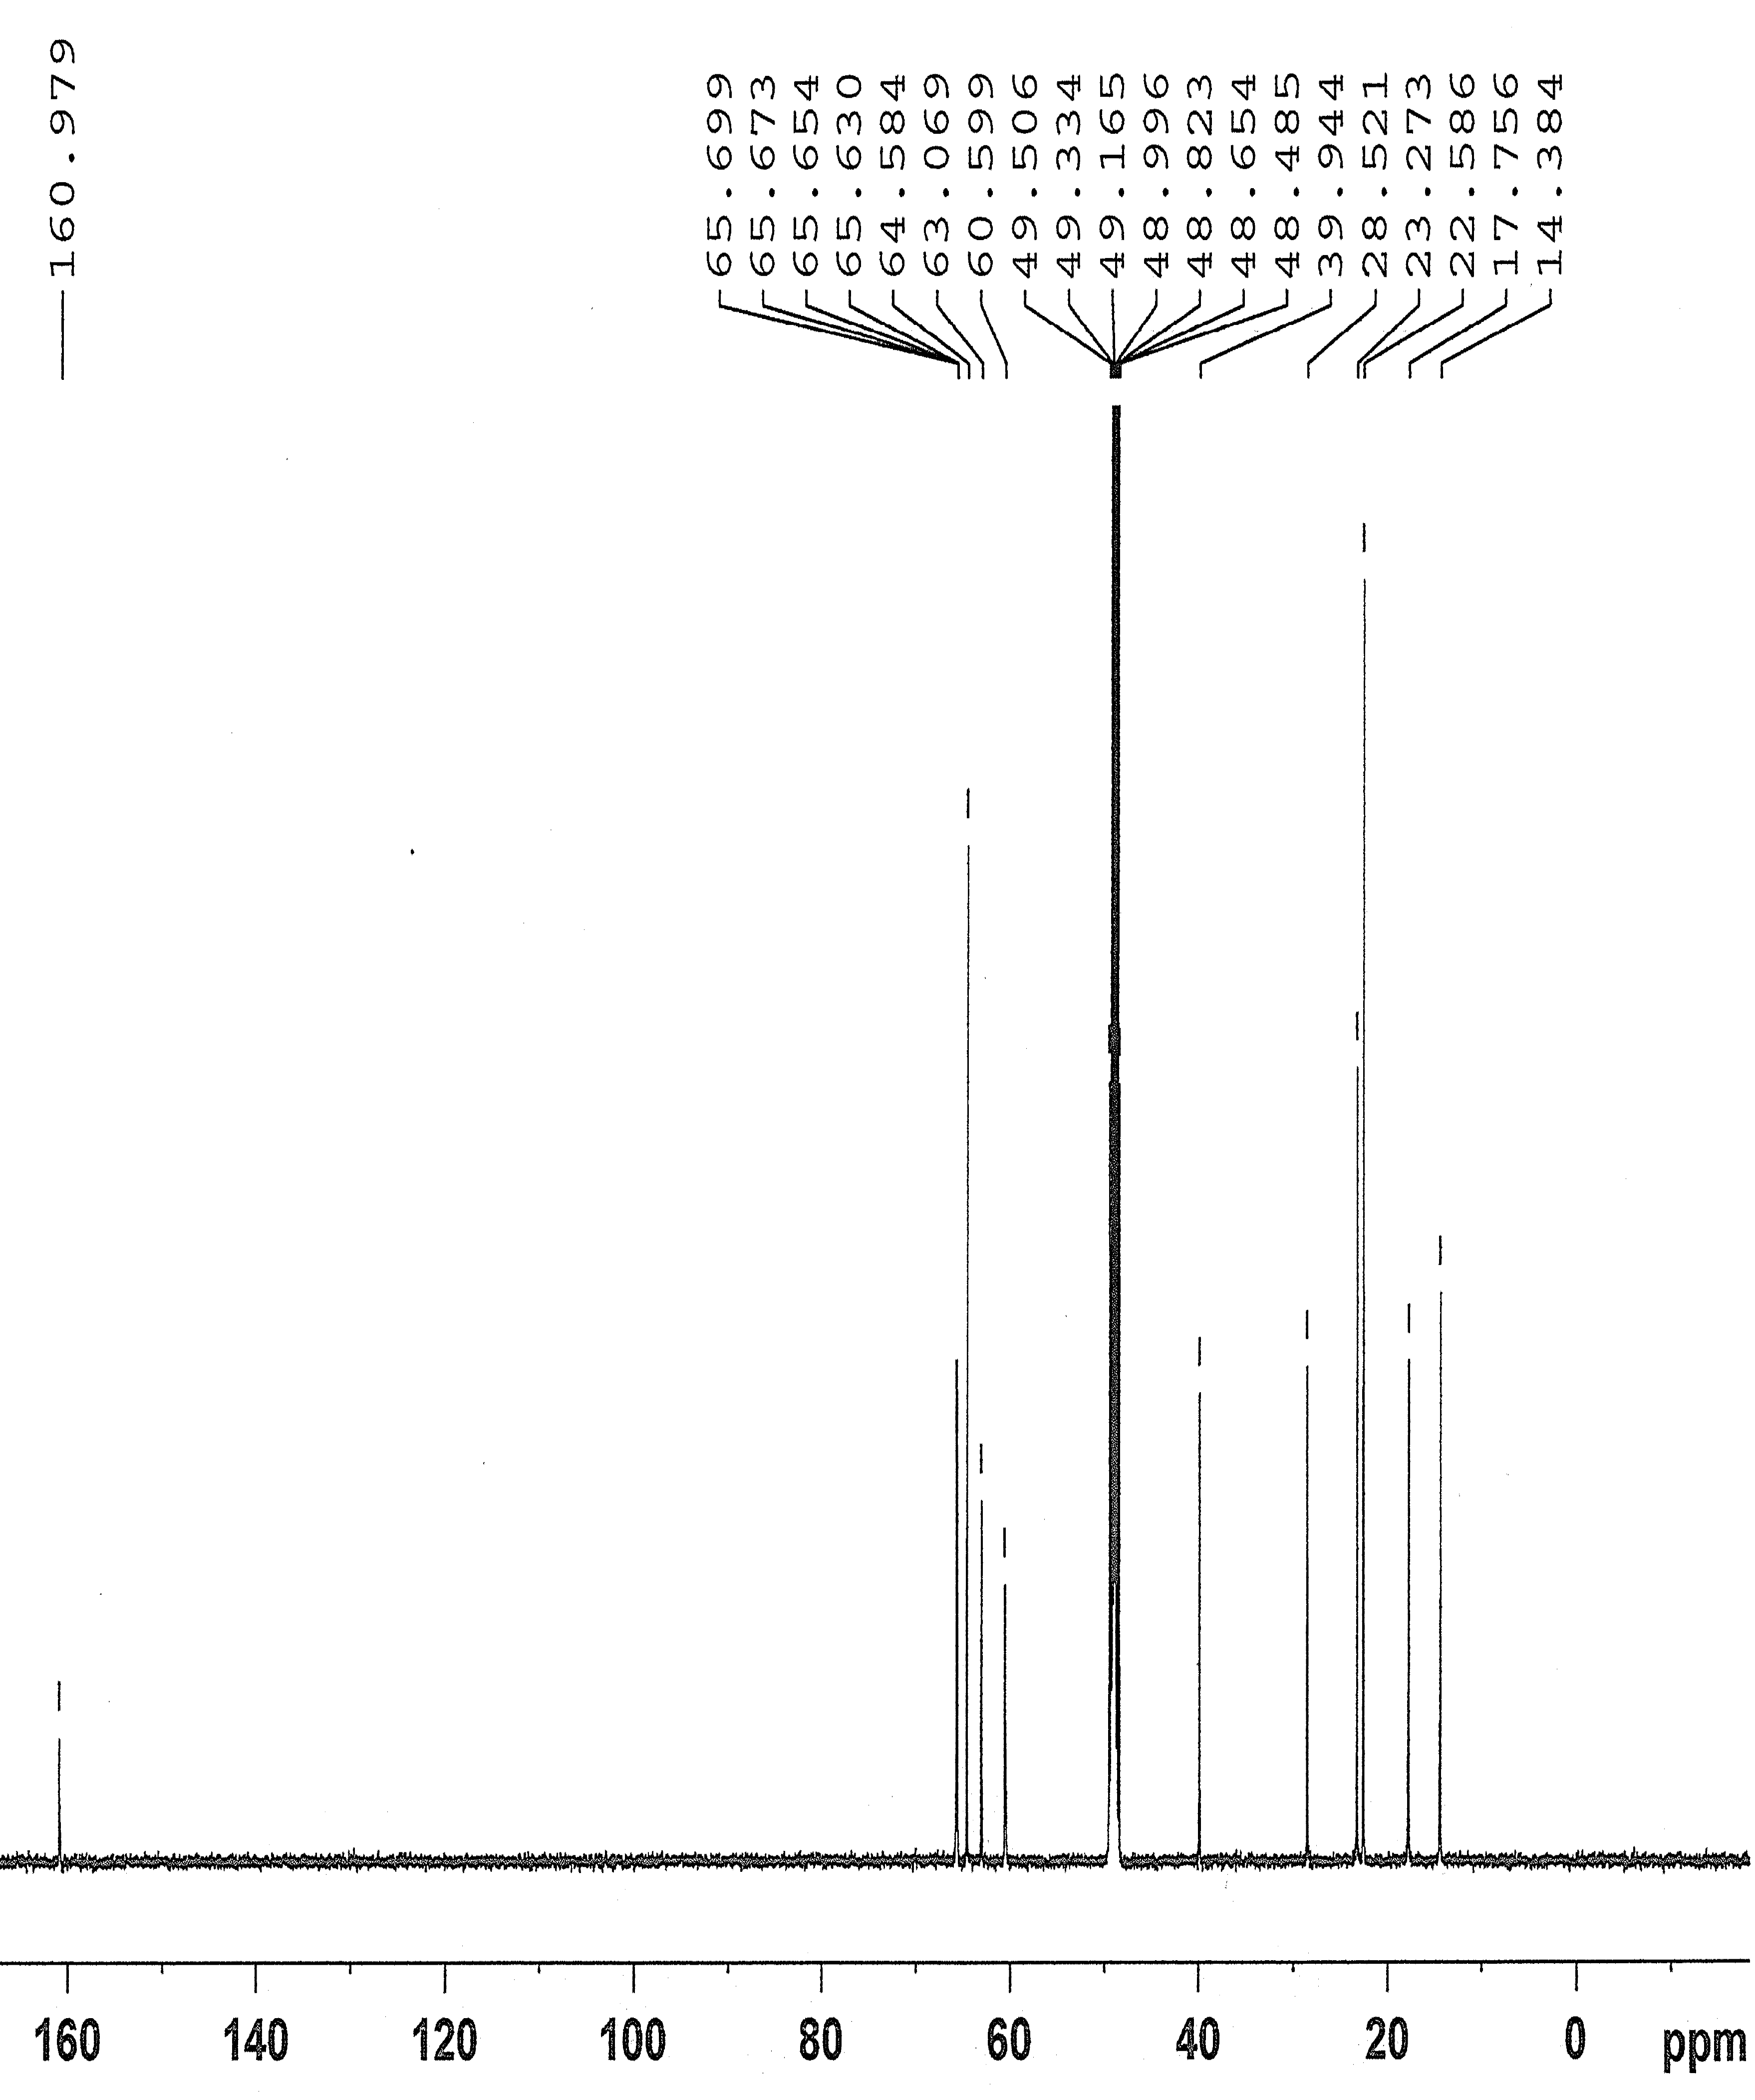


13C NMR of **2o**

**Spectral data of compound (2p):**


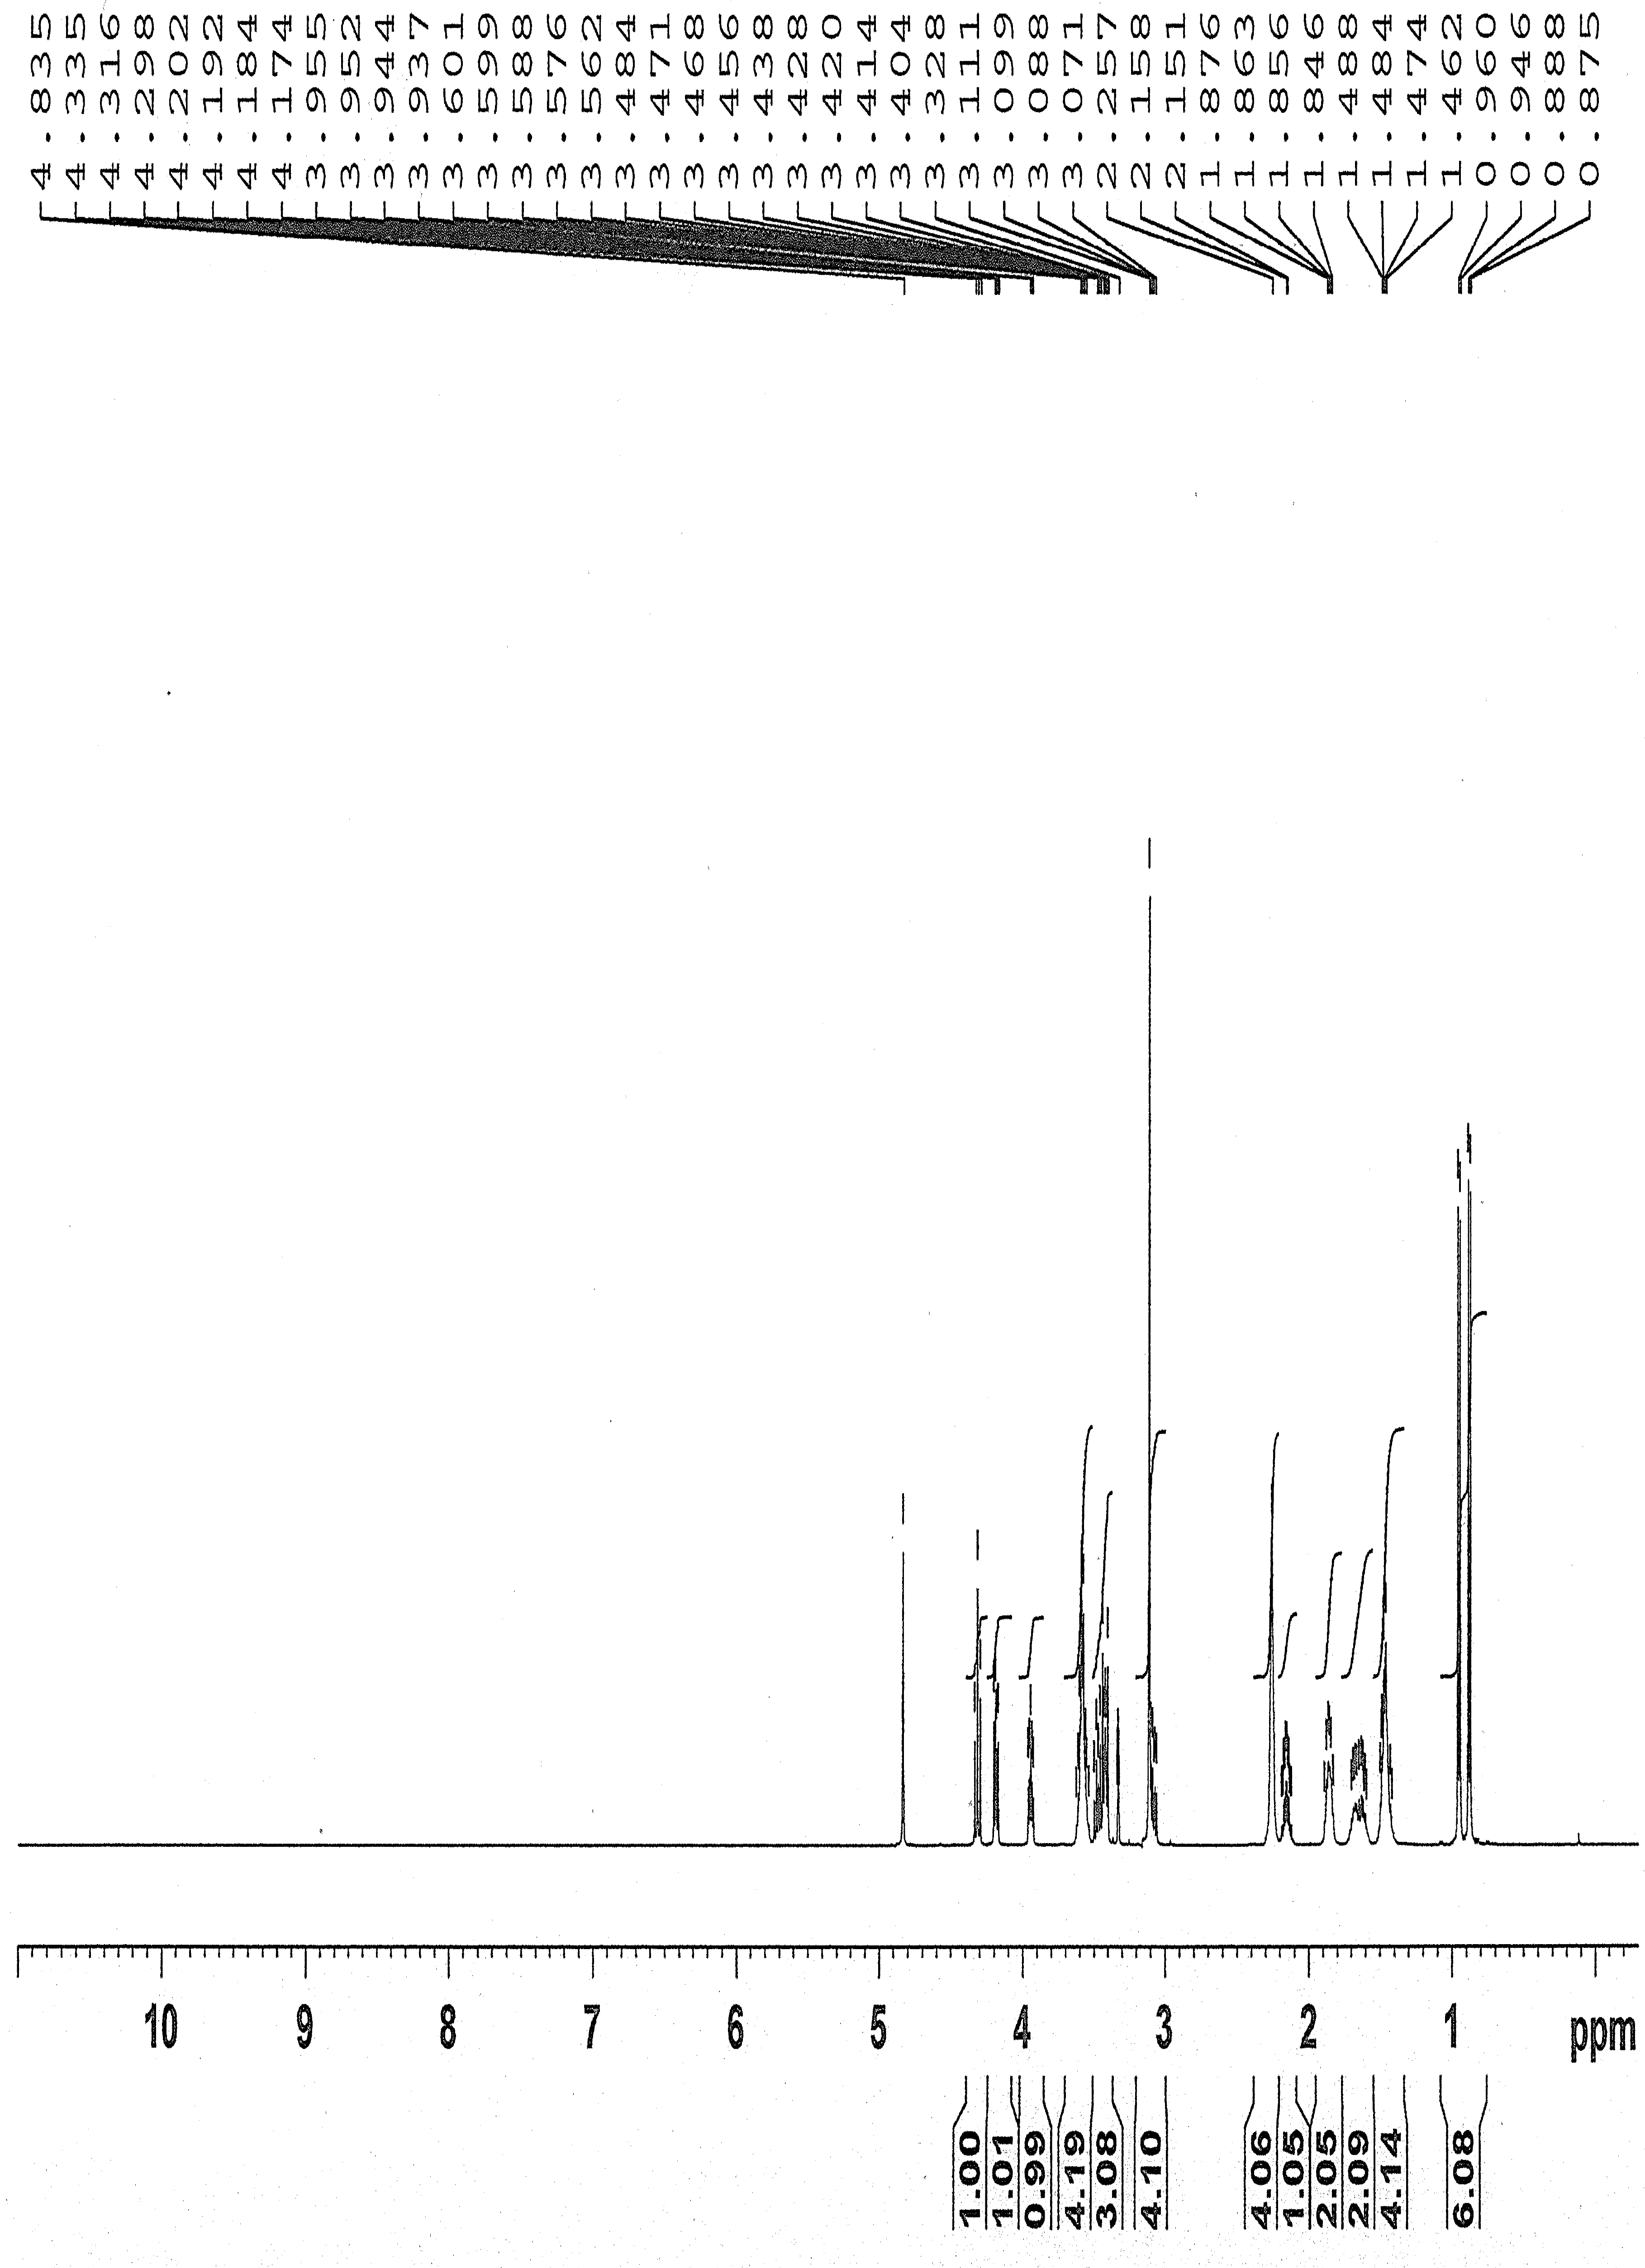


1H NMR of **2p**


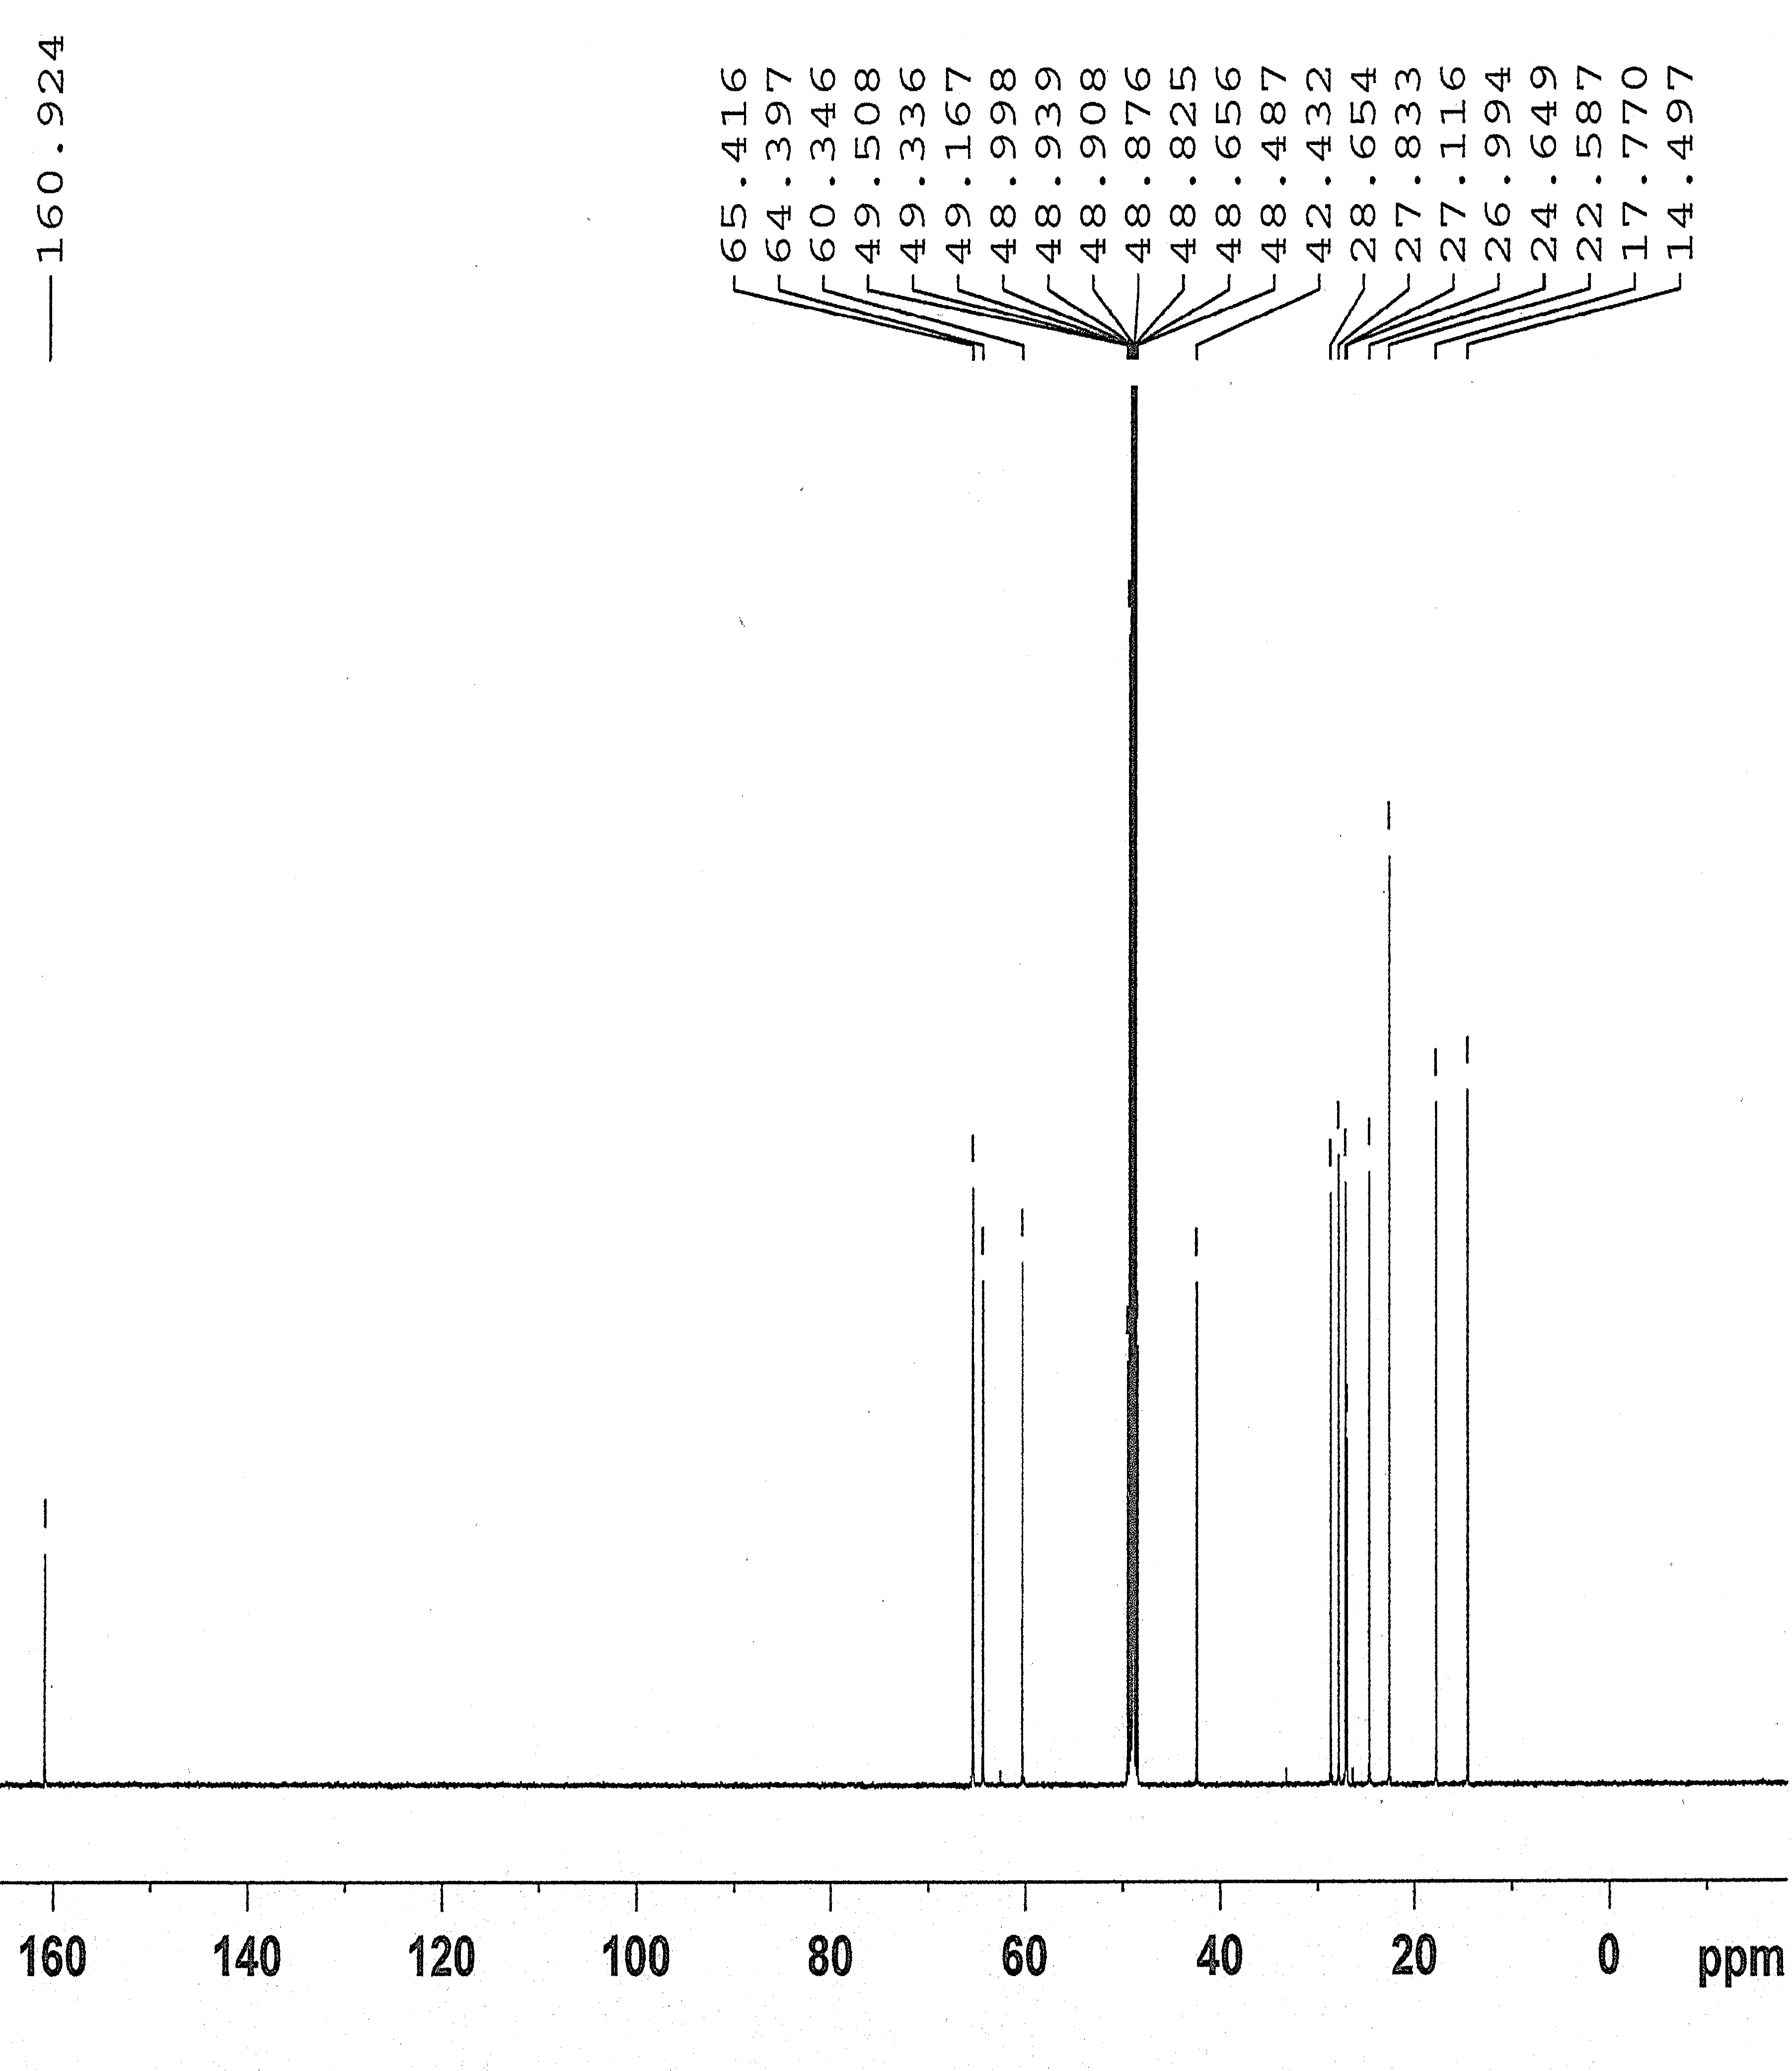


13C NMR of **2p**

**Spectral data of compound (2q):**


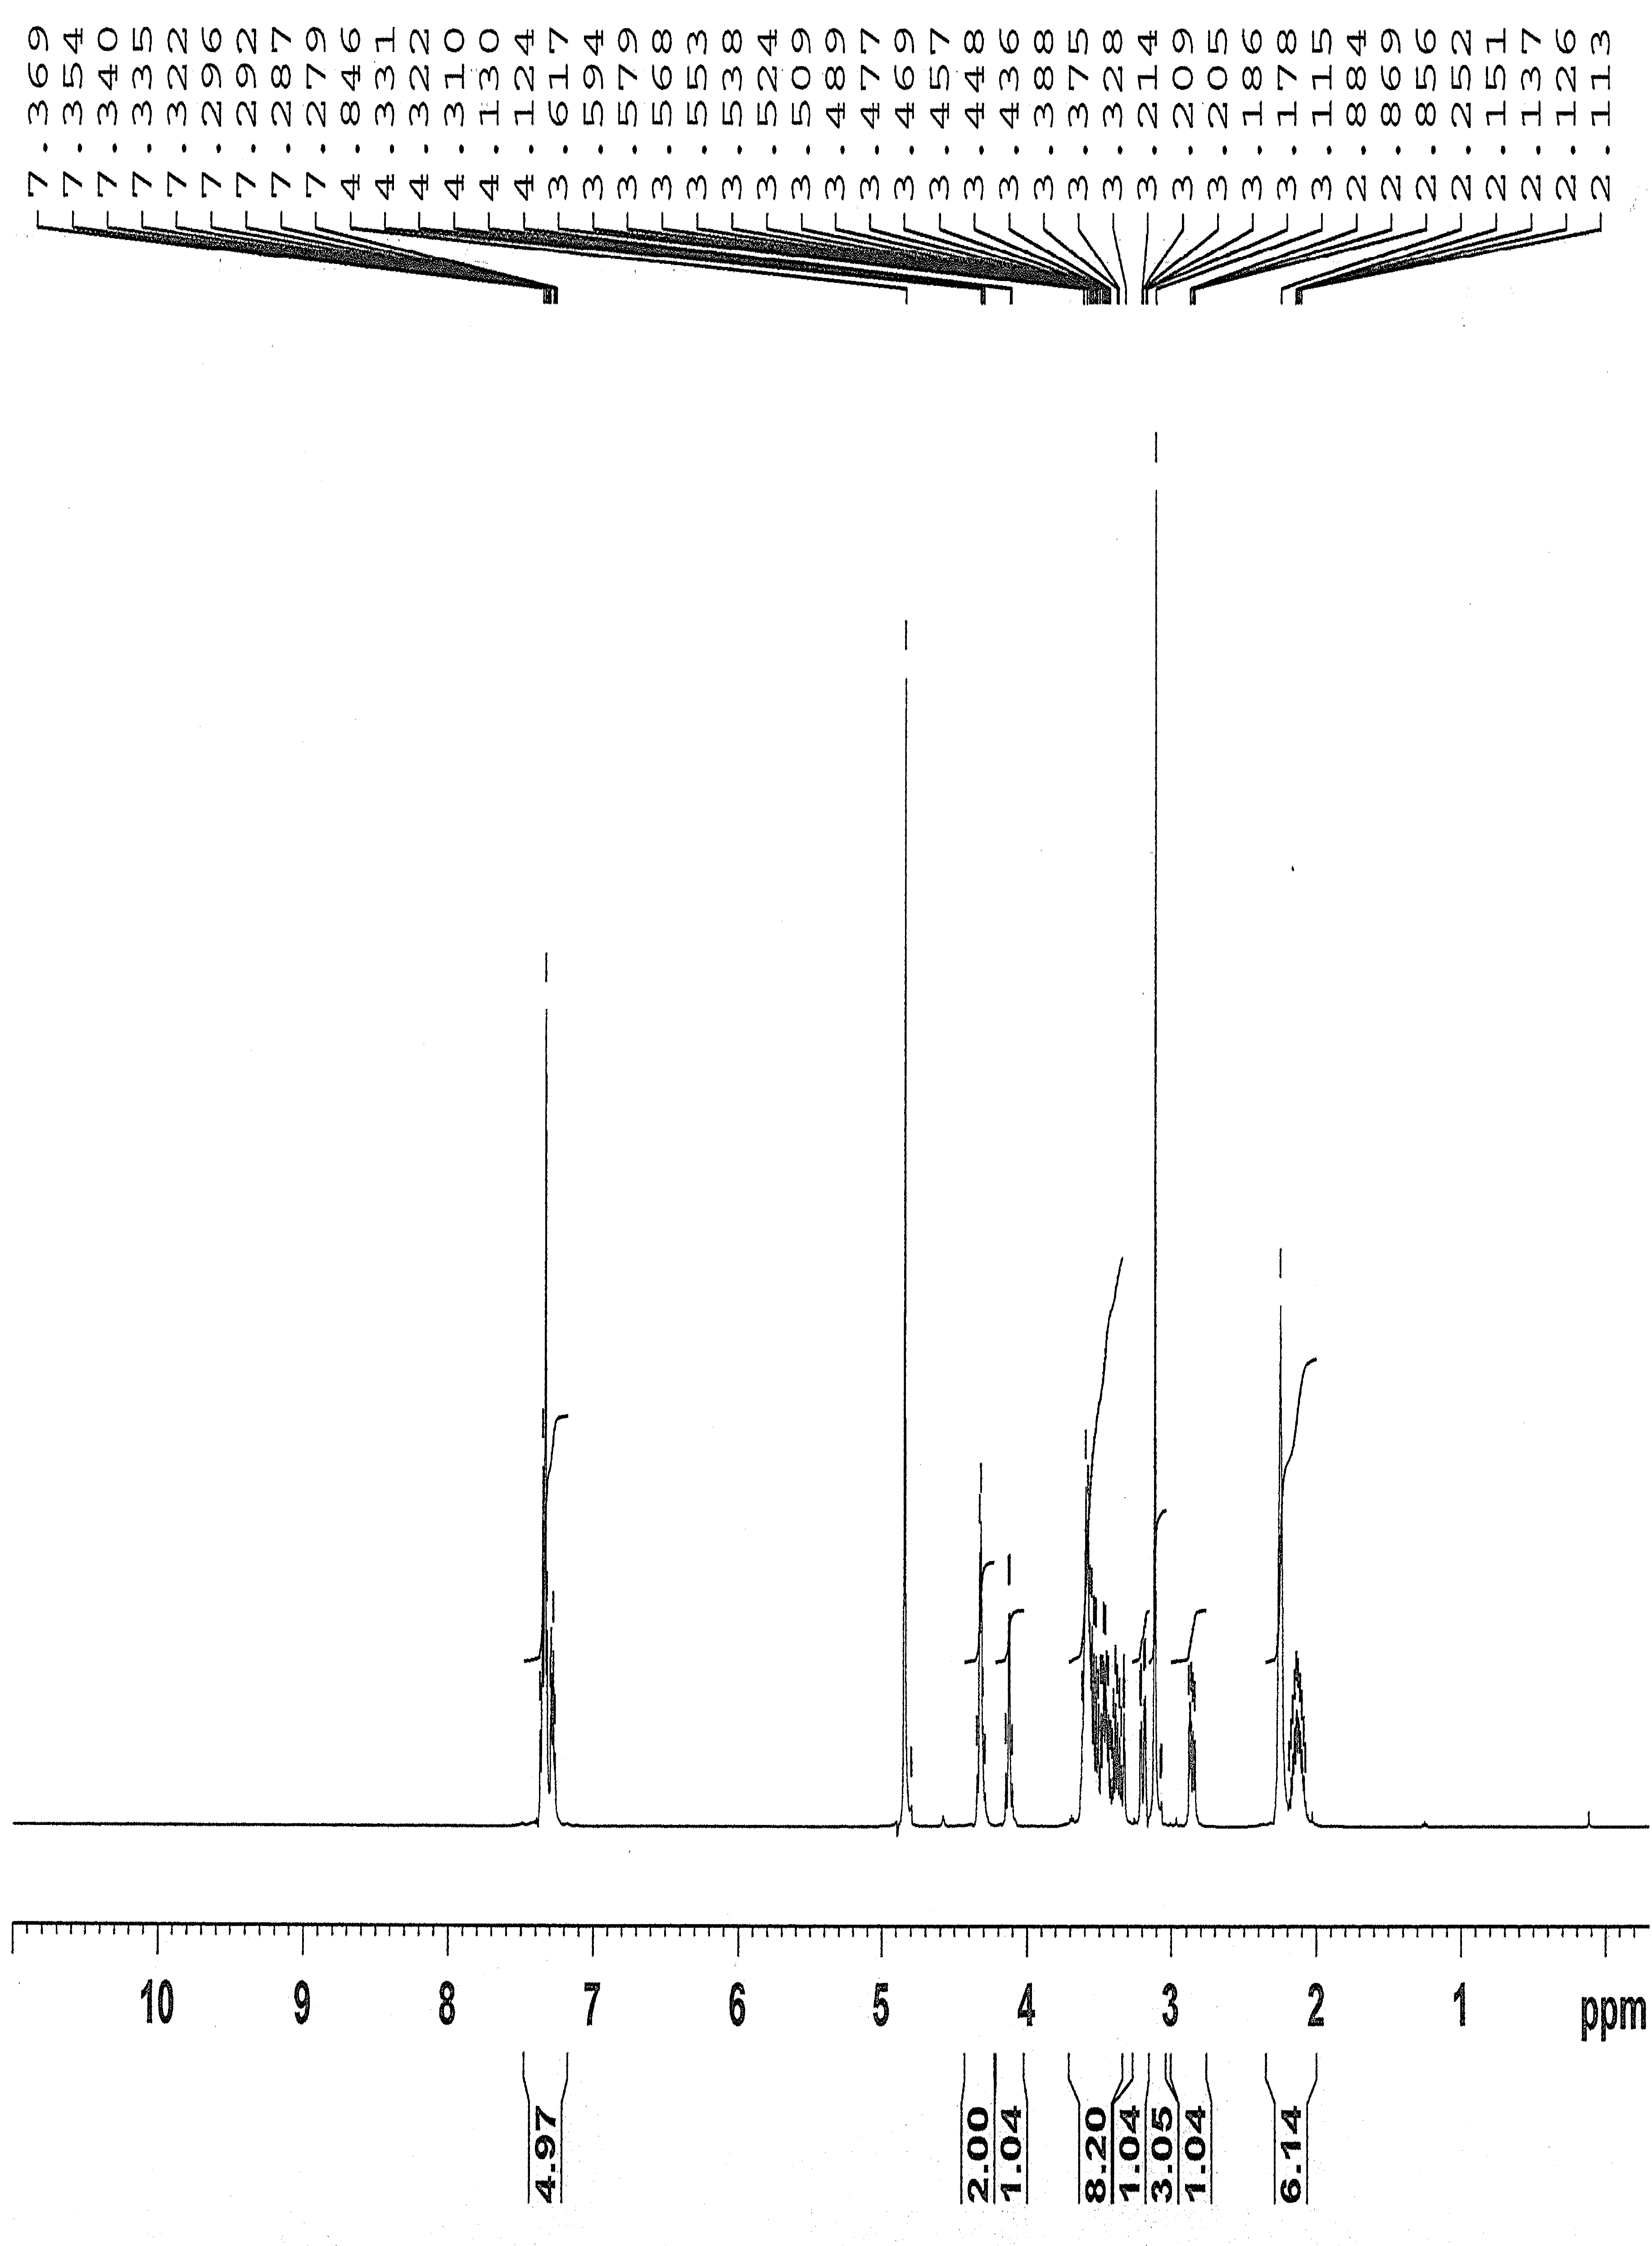


1H NMR of **2q**


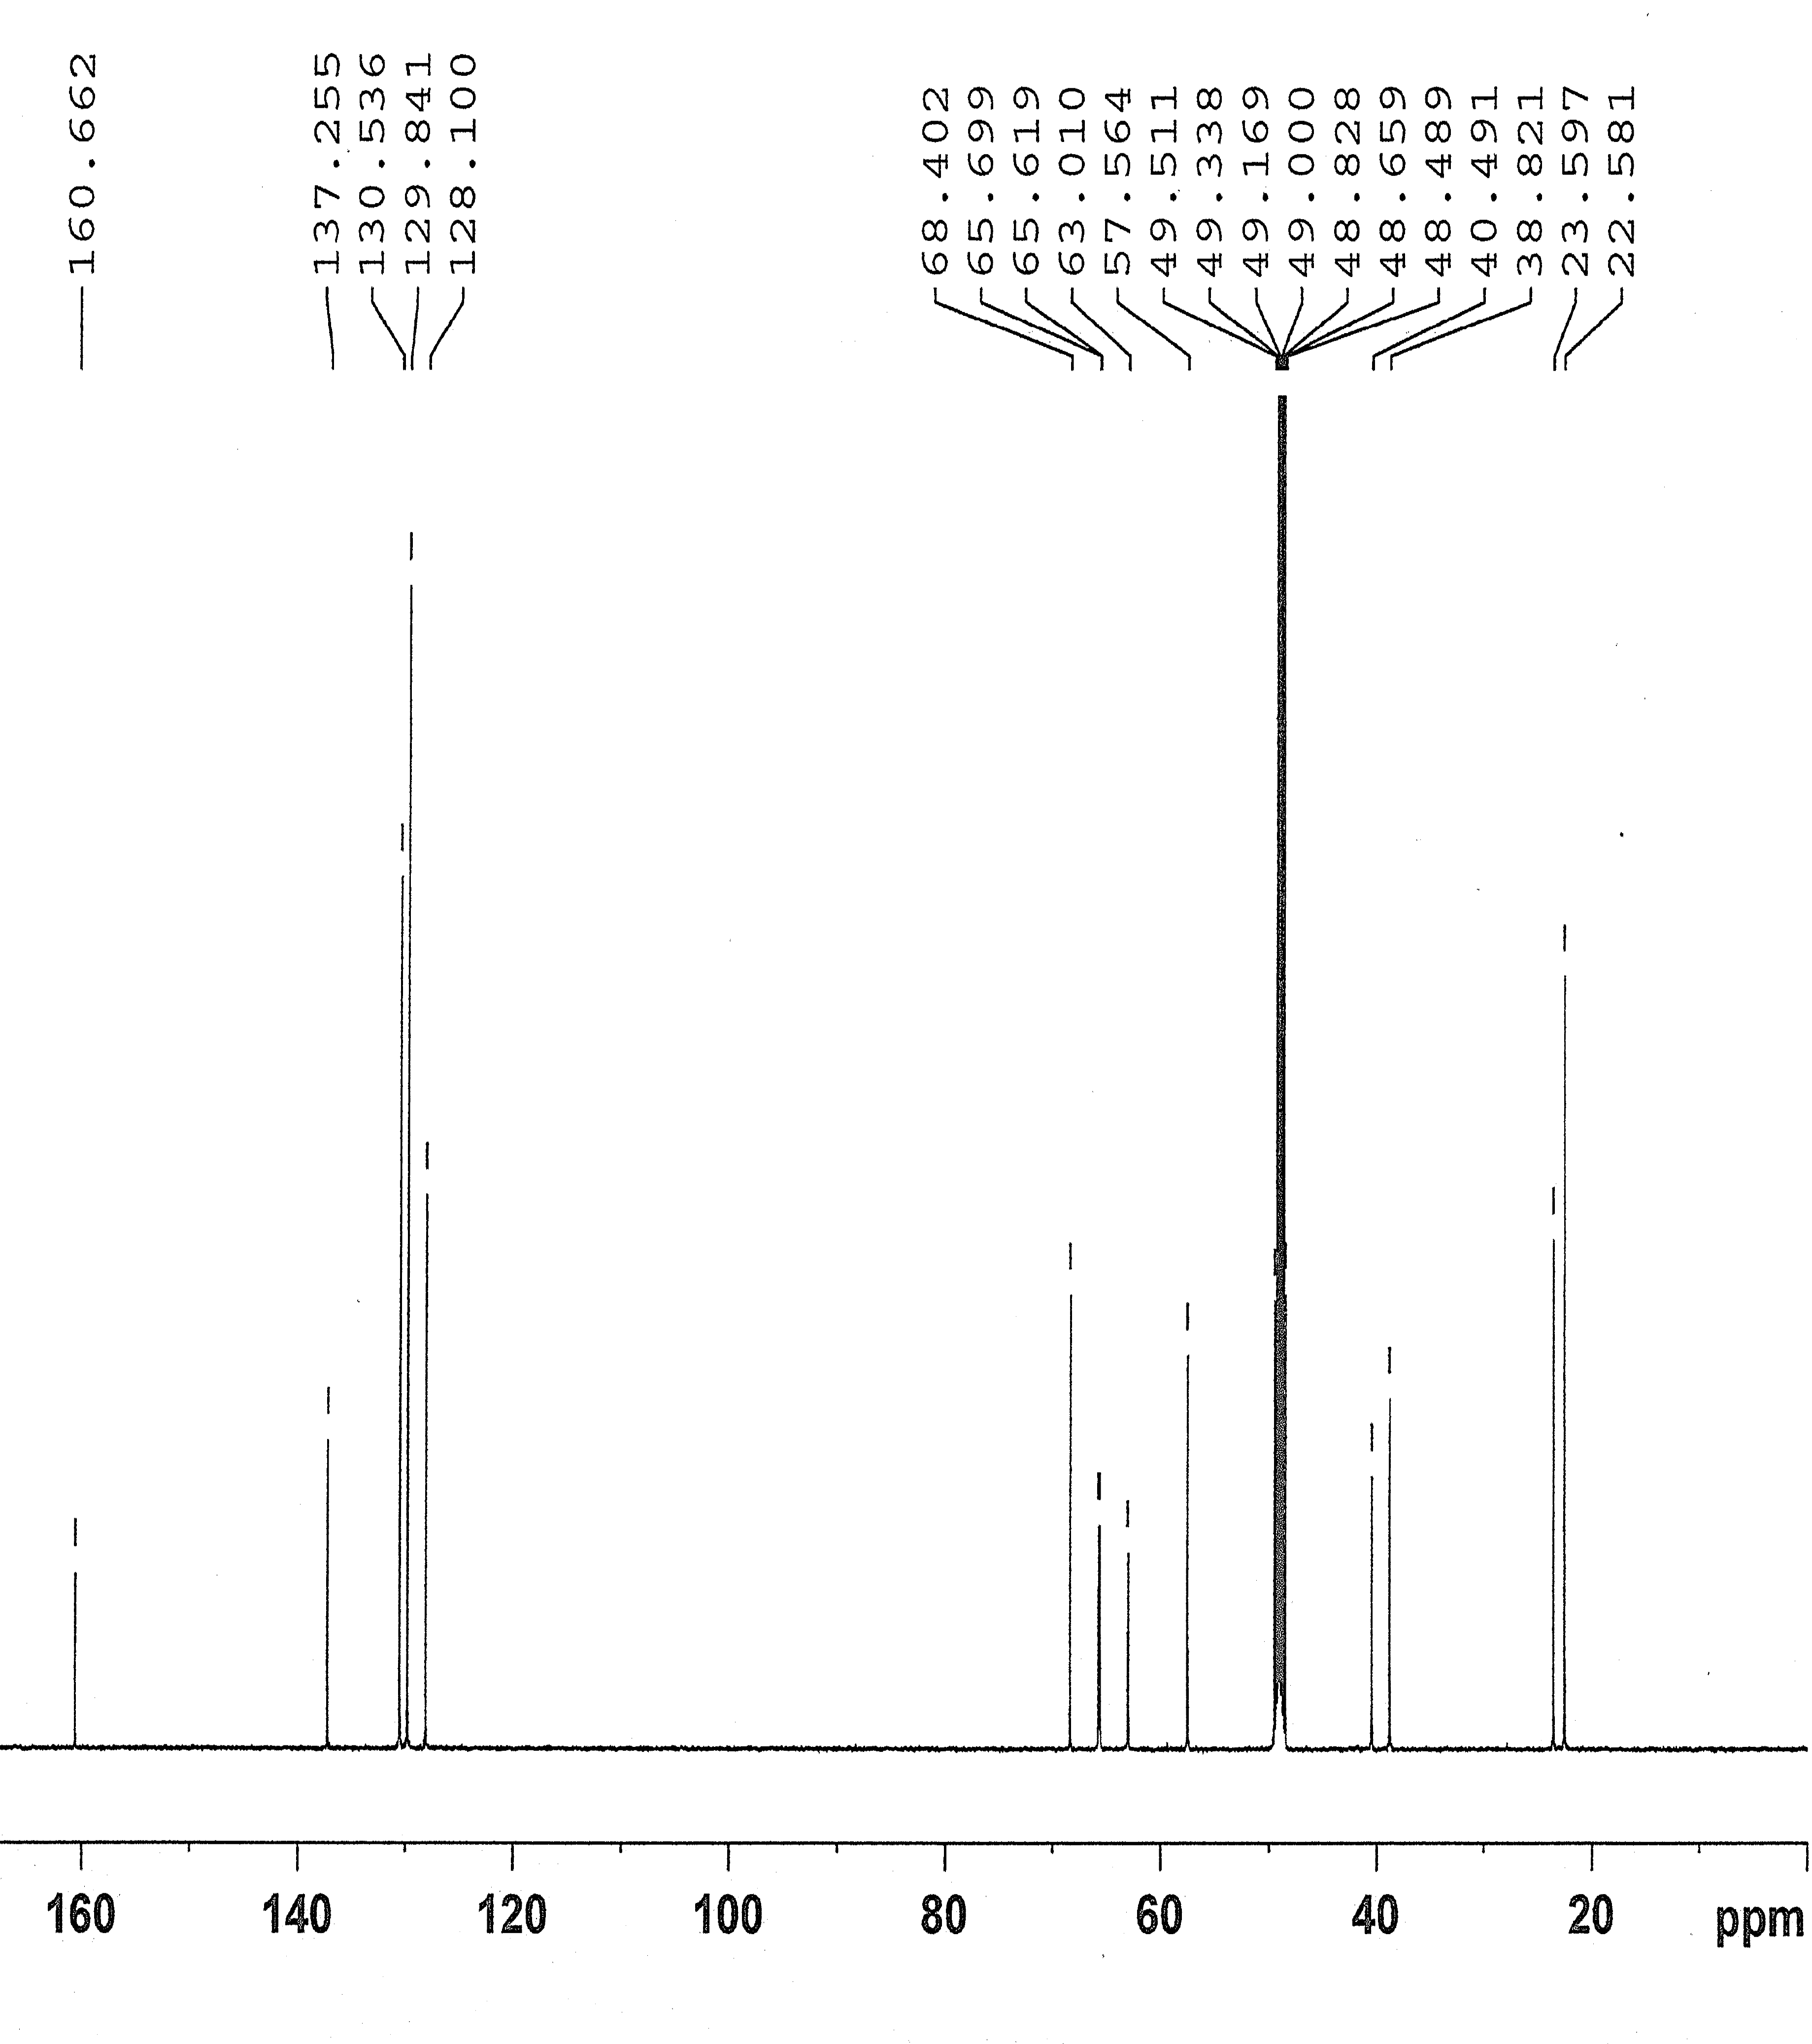


13CNMR of **2q**

**Spectral data of compound (2r):**


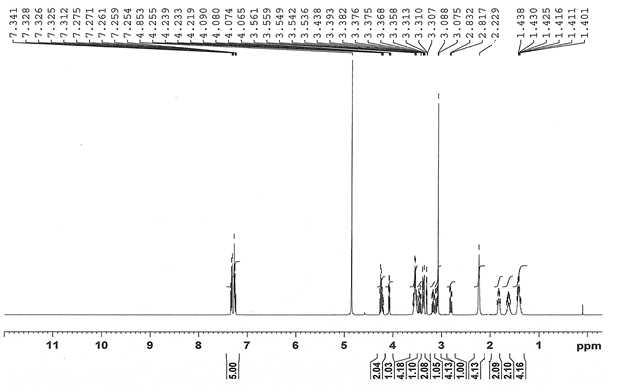


1H NMR of **2r**


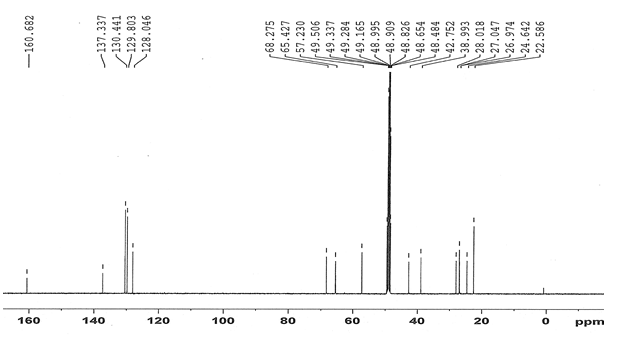


13C NMR of **2r**
